# Supplementary material for: Functional Characterization of AP2/ERF Transcription Factors during Flower Development and Anthocyanin Biosynthesis Related Candidate Genes in Lycoris
Source: MDPI journal article supplement (doi:10.3390/ijms241914464), 2023-09-23
Supplement: s1 [file s1]

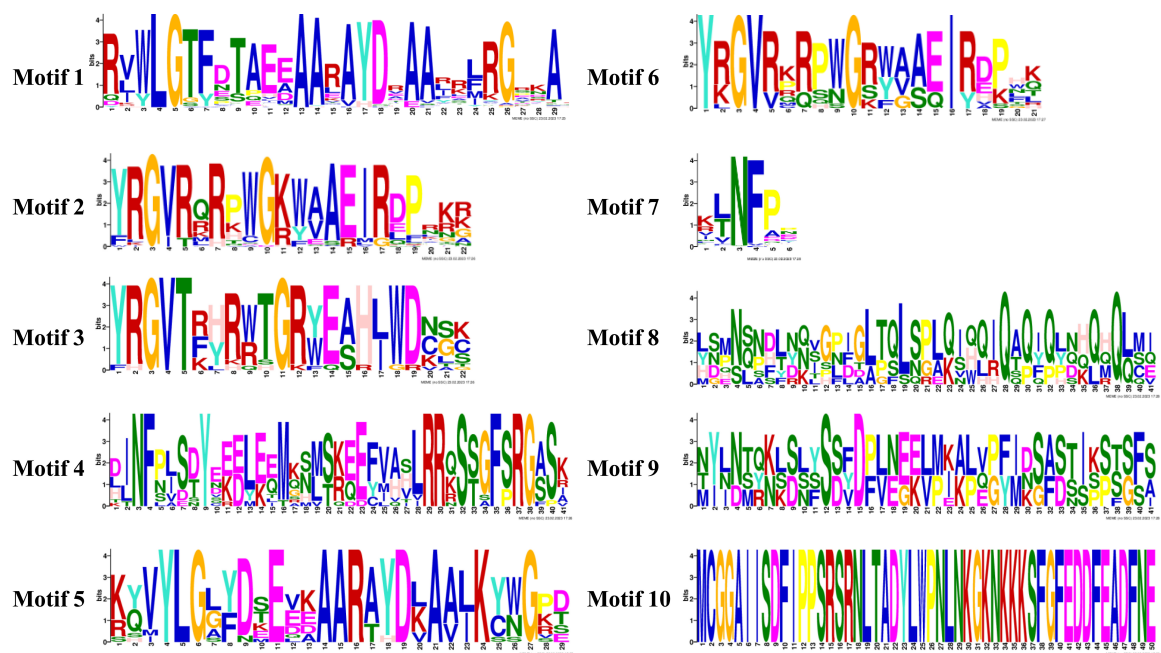

Figure S1. Conservation and diversity of the motifs in LrAP2/ERF proteins. The schematic representation of ten motifs in AP2/ERF family is elucidated by MEME.

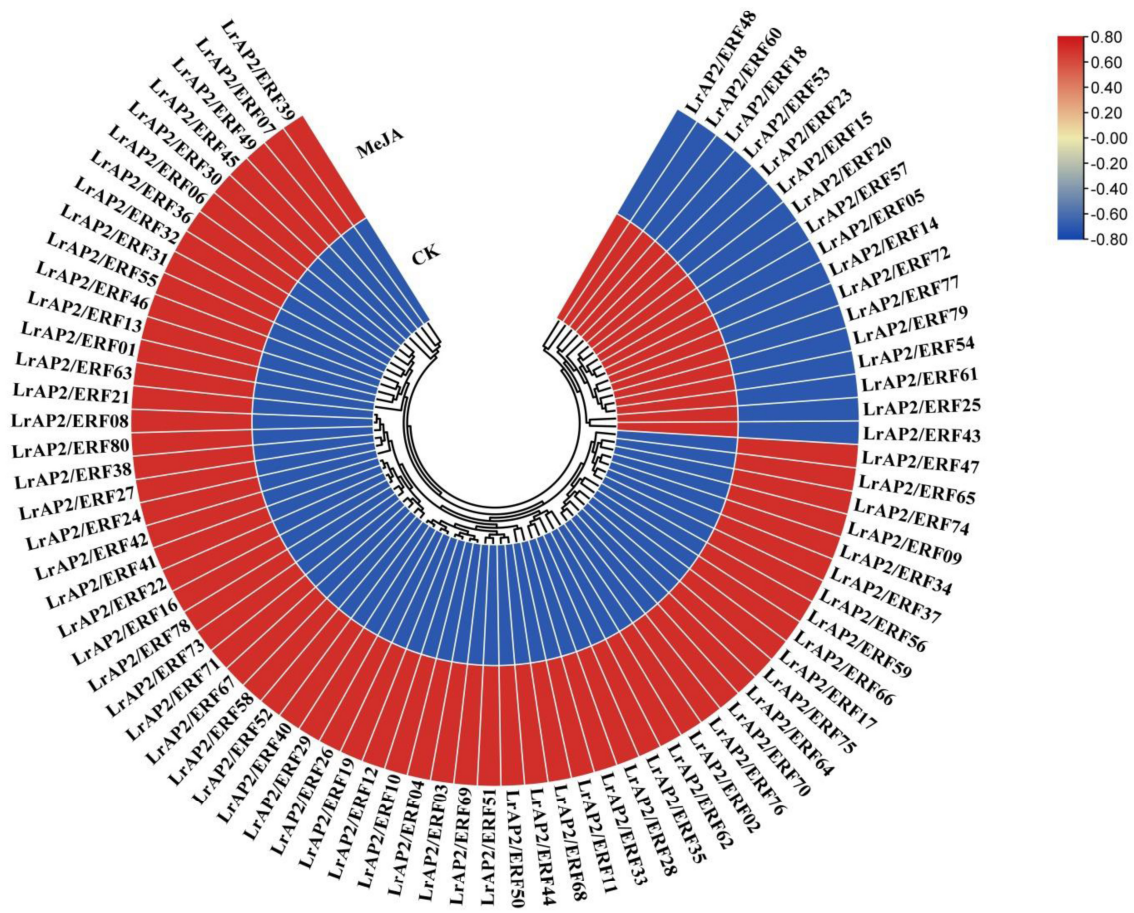

Figure S2. Heatmap of *LrAP2/ERF* genes expression profiles with MeJA treatment. Red and blue represent high and low relative transcript abundance, respectively.
