# Supplementary material for: Functional Characterization of AP2/ERF Transcription Factors during Flower Development and Anthocyanin Biosynthesis Related Candidate Genes in Lycoris
Source: Int J Mol Sci. 2023 Sep 23;24(19):14464. doi: 10.3390/ijms241914464 (PMC10572147; doi:10.3390/ijms241914464)
Supplement: Supplementary file 1 [file ijms-24-14464-s001.zip]

Archive with 8 entries (8 files):
- ijms-2610519-supplementary figures.pdf
- Table S1.xlsx
- Table S2.xlsx
- Table S3.xlsx
- Table S4.xlsx
- Table S5.xls
- Table S6.xlsx
- Table S7.xlsx
