# Supplementary material for: Functional Characterization of AP2/ERF Transcription Factors during Flower Development and Anthocyanin Biosynthesis Related Candidate Genes in Lycoris
Source: Int J Mol Sci. 2023 Sep 23;24(19):14464. doi: 10.3390/ijms241914464 (PMC10572147; doi:10.3390/ijms241914464)
Supplement: Supplementary file 1 [file ijms-24-14464-s001.zip › Table S1.xlsx]

## Sheet: Table S1a
Table S1a. Chacteristics of LrWRKY genes identified from Lycoris radiata transcriptome.
Gene name	Gene ID	Amino acid length	Gene length/bp	Isoelectric Point	Molecular weight（Da）	Subcellular Localization
LrAP2/ERF01	TRINITY_DN10364_c0_g1_i1_1	483	1452	9.03	54096.3	Nuclear
LrAP2/ERF02	TRINITY_DN12175_c0_g1_i1_1	171	516	8.93	18876.4	Chloroplast
LrAP2/ERF03	TRINITY_DN13423_c0_g1_i1_3	157	474	9	16890.3	Nuclear Chloroplast
LrAP2/ERF04	TRINITY_DN17794_c0_g1_i1_2	137	414	4.99	15594.6	Nuclear Mitochondrial
LrAP2/ERF05	TRINITY_DN20068_c0_g1_i1_2	231	696	5.98	25236.8	Nuclear
LrAP2/ERF06	TRINITY_DN21501_c0_g1_i1_3	251	756	5.30	27872.7	Nuclear
LrAP2/ERF07	TRINITY_DN24240_c0_g1_i2_3	332	999	4.89	37682.7	Nuclear
LrAP2/ERF08	TRINITY_DN24766_c0_g2_i1_2	153	462	9.33	17404.8	Nuclear Cytoplasmic
LrAP2/ERF09	TRINITY_DN24861_c0_g1_i1_2	253	762	7.89	29021.4	Nuclear Chloroplast.
LrAP2/ERF10	TRINITY_DN25858_c0_g1_i1_1	222	669	5.33	24510.6	Nuclear
LrAP2/ERF11	TRINITY_DN26318_c0_g1_i1_1	205	618	5.83	23029.5	Nuclear
LrAP2/ERF12	TRINITY_DN26866_c0_g1_i1_2	211	636	5.7	23053.5	Nuclear Mitochondrial
LrAP2/ERF13	TRINITY_DN26982_c0_g1_i2_2	516	1551	6.42	57941.2	Nuclear
LrAP2/ERF14	TRINITY_DN27056_c0_g1_i1_3	121	366	9	13517.5	Chloroplast
LrAP2/ERF15	TRINITY_DN27307_c0_g1_i1_2	175	528	9.3	19314.3	Nuclear Cytoplasmic
LrAP2/ERF16	TRINITY_DN27561_c0_g1_i1_2	249	750	8.6	27771.1	Chloroplast
LrAP2/ERF17	TRINITY_DN27849_c0_g2_i1_2	340	1023	9.08	38673.9	Nuclear Chloroplast
LrAP2/ERF18	TRINITY_DN28590_c0_g2_i1_2	267	804	8.42	29161.7	Nuclear Cytoplasmic
LrAP2/ERF19	TRINITY_DN28789_c0_g1_i1_2	261	786	6.66	28441.5	Cytoplasmic
LrAP2/ERF20	TRINITY_DN28926_c0_g1_i1_3	233	702	5.98	25478.1	Nuclear
LrAP2/ERF21	TRINITY_DN29071_c0_g1_i1_2	236	711	9.42	24905.7	Chloroplast
LrAP2/ERF22	TRINITY_DN29120_c0_g1_i1_3	125	378	10.05	14122.6	Nuclear
LrAP2/ERF23	TRINITY_DN29860_c0_g1_i3_2	199	600	7.7	22157.7	Nuclear Cytoplasmic
LrAP2/ERF24	TRINITY_DN30100_c0_g1_i1_1	341	1026	9.25	38574	Nuclear
LrAP2/ERF25	TRINITY_DN30245_c0_g1_i1_2	241	726	6.71	26881.9	Nuclear
LrAP2/ERF26	TRINITY_DN30703_c0_g1_i1_3	406	1221	9.19	44794.1	Nuclear
LrAP2/ERF27	TRINITY_DN30921_c0_g1_i1_1	216	651	5.34	23951.2	Nuclear
LrAP2/ERF28	TRINITY_DN31411_c0_g1_i1_2	179	540	9.37	19875.3	Nuclear Chloroplast
LrAP2/ERF29	TRINITY_DN31988_c0_g2_i4_2	229	690	10.18	25966	Nuclear
LrAP2/ERF30	TRINITY_DN32015_c0_g1_i1_2	264	795	6.93	29513.6	Nuclear
LrAP2/ERF31	TRINITY_DN32255_c0_g1_i2_1	248	747	9.22	27664.9	Chloroplast
LrAP2/ERF32	TRINITY_DN32334_c0_g1_i2_2	258	777	9.37	28736	Nuclear Chloroplast
LrAP2/ERF33	TRINITY_DN33263_c0_g1_i2_3	337	1014	9.11	38406.3	Nuclear
LrAP2/ERF34	TRINITY_DN33688_c1_g1_i3_2	344	1035	6.18	37837.1	Nuclear Cytoplasmic
LrAP2/ERF35	TRINITY_DN33713_c0_g1_i3_3	406	1221	7.77	44680.3	Nuclear
LrAP2/ERF36	TRINITY_DN34147_c0_g1_i1_3	134	405	10.35	14812.8	Nuclear Mitochondrial
LrAP2/ERF37	TRINITY_DN34236_c0_g1_i3_2	309	930	5.81	35195.4	Nuclear Cytoplasmic
LrAP2/ERF38	TRINITY_DN34597_c0_g1_i1_1	226	681	5.48	25461	Nuclear
LrAP2/ERF39	TRINITY_DN34769_c0_g1_i2_3	332	999	4.93	37696.8	Nuclear
LrAP2/ERF40	TRINITY_DN35028_c0_g1_i1_1	208	627	5.98	23199.6	Nuclear
LrAP2/ERF41	TRINITY_DN35472_c0_g1_i1_1	314	945	5.19	35908	Nuclear
LrAP2/ERF42	TRINITY_DN35726_c1_g1_i3_2	290	873	5.80	32490.9	Nuclear Cytoplasmic
LrAP2/ERF43	TRINITY_DN36192_c0_g1_i2_1	243	732	9.15	27110.5	Nuclear
LrAP2/ERF44	TRINITY_DN36257_c0_g2_i1_1	163	492	6.42	18554.1	Nuclear
LrAP2/ERF45	TRINITY_DN36679_c0_g2_i3_2	343	1032	4.97	38630	Nuclear Chloroplast
LrAP2/ERF46	TRINITY_DN36750_c0_g1_i1_2	243	732	6.30	27121.1	Nuclear
LrAP2/ERF47	TRINITY_DN36915_c0_g1_i1_1	214	645	5.13	23374.8	Nuclear
LrAP2/ERF48	TRINITY_DN37038_c0_g4_i1_2	178	537	8.93	18972.3	Nuclear Chloroplast
LrAP2/ERF49	TRINITY_DN37094_c0_g2_i4_2	331	996	4.97	37477.5	Nuclear
LrAP2/ERF50	TRINITY_DN37094_c0_g3_i1_2	307	924	5.87	33125.4	Nuclear
LrAP2/ERF51	TRINITY_DN37131_c0_g1_i2_1	155	468	5.26	17398.7	Nuclear Mitochondrial
LrAP2/ERF52	TRINITY_DN37653_c0_g1_i1_1	245	738	9.03	27623.6	Mitochondrial Chloroplast
LrAP2/ERF53	TRINITY_DN37936_c0_g1_i6_2	216	651	7.89	24588.3	Nuclear
LrAP2/ERF54	TRINITY_DN38104_c1_g1_i3_2	404	1215	6.16	45524.8	Nuclear Cytoplasmic
LrAP2/ERF55	TRINITY_DN38625_c1_g3_i1_1	476	1431	8.88	53249.3	Nuclear
LrAP2/ERF56	TRINITY_DN38994_c0_g2_i1_2	332	999	5.72	36530.8	Nuclear Cytoplasmic
LrAP2/ERF57	TRINITY_DN39064_c0_g1_i1_1	211	636	5.11	23537	Nuclear
LrAP2/ERF58	TRINITY_DN39132_c1_g1_i12_3	339	1020	5.3	38128.5	Nuclear
LrAP2/ERF59	TRINITY_DN40074_c0_g1_i6_3	215	648	5.54	23389.9	Chloroplast
LrAP2/ERF60	TRINITY_DN40115_c0_g2_i2_3	181	546	8.68	19300.7	Chloroplast
LrAP2/ERF61	TRINITY_DN40143_c0_g1_i2_1	195	588	8.94	22135.7	Nuclear Chloroplast
LrAP2/ERF62	TRINITY_DN40156_c0_g1_i1_1	204	615	9.87	22352	Nuclear Chloroplast
LrAP2/ERF63	TRINITY_DN40251_c0_g3_i4_2	355	1068	9.50	39615.1	Nuclear
LrAP2/ERF64	TRINITY_DN40335_c2_g1_i4_2	417	1254	9.21	46601.3	Nuclear
LrAP2/ERF65	TRINITY_DN41349_c0_g1_i2_3	309	930	7.75	34310.8	Nuclear Chloroplast
LrAP2/ERF66	TRINITY_DN41545_c0_g1_i4_3	274	825	9.37	29652.2	Nuclear
LrAP2/ERF67	TRINITY_DN42175_c0_g1_i1_3	270	813	7.75	30396.7	Nuclear
LrAP2/ERF68	TRINITY_DN42538_c0_g1_i1_1	232	699	9.42	25295.2	Nuclear Chloroplast
LrAP2/ERF69	TRINITY_DN4270_c0_g1_i1_2	274	825	6.24	29754	Nuclear Chloroplast
LrAP2/ERF70	TRINITY_DN42881_c0_g1_i1_3	416	1251	7.68	45966.5	Nuclear
LrAP2/ERF71	TRINITY_DN44049_c1_g2_i1_3	129	390	9.84	14394.6	Nuclear
LrAP2/ERF72	TRINITY_DN45083_c0_g1_i2_3	419	1260	6.38	47164.1	Mitochondrial Chloroplast
LrAP2/ERF73	TRINITY_DN46237_c0_g2_i1_1	363	1092	5.8	41098.5	Nuclear
LrAP2/ERF74	TRINITY_DN46339_c1_g1_i1_1	313	942	6.67	35761.1	Nuclear
LrAP2/ERF75	TRINITY_DN47273_c0_g3_i1_1	219	660	6.98	24575.4	Nuclear Cytoplasmic
LrAP2/ERF76	TRINITY_DN47287_c0_g4_i3_1	392	1179	6.63	44122.5	Nuclear
LrAP2/ERF77	TRINITY_DN49639_c0_g1_i1_1	389	1170	5.2	43646.1	Nuclear Chloroplast
LrAP2/ERF78	TRINITY_DN50832_c1_g1_i8_1	177	534	9.11	20137.8	Chloroplast
LrAP2/ERF79	TRINITY_DN51311_c0_g1_i5_1	348	1047	6.57	39676.9	Nuclear Cytoplasmic
LrAP2/ERF80	TRINITY_DN57296_c0_g1_i1_1	218	657	6.43	23552.7	Nuclear Chloroplast
						0.0875

## Sheet: Table S1b
Table S1b. Chacteristics of LrAP2/ERF genes identified from Lycoris longitubatranscriptome.
Gene name	L. longituba Gene ID	Root-1	Root-2	Root-3	Leaf-1	Leaf-2	Leaf-3	Bulb-1	Bulb-2	Bulb-3	NR
LrAP2/ERF01	c144591_g1	0	0.07	0.32	3.05	5.42	3.86	1.59	1.46	1.57	gi|672198778|ref|XP_008777425.1| PREDICTED: AP2-like ethylene-responsive transcription factor ANT [Phoenix dactylifera]
LrAP2/ERF02	c123998_g1	25.57	13.94	10.99	26.05	11.74	11.75	64.31	32.73	33.38	gi|592748063|gb|AHL44126.1| EREB1 [Dendrobium catenatum]
LrAP2/ERF03	c106092_g1	11.39	2.27	3.71	3.32	1.33	1.9	12.89	5.61	4.42	gi|672200951|ref|XP_008778008.1| PREDICTED: ethylene-responsive transcription factor 12-like [Phoenix dactylifera]
LrAP2/ERF04	c262311_g1	2.27	0.81	1.1	0.57	0	0	0	0	0	gi|743806843|ref|XP_010927841.1| PREDICTED: ethylene-responsive transcription factor ERF020-like [Elaeis guineensis]
LrAP2/ERF05	c134676_g2	89.67	47.82	48.8	45.96	26.82	29.85	115.24	51.2	50.04	gi|743778500|ref|XP_010919713.1| PREDICTED: ethylene-responsive transcription factor 2 [Elaeis guineensis]
LrAP2/ERF06	c115292_g1	1.26	1.61	1.55	0.15	0.06	0.48	1.18	0.51	0.31	gi|743770848|ref|XP_010915710.1| PREDICTED: ethylene-responsive transcription factor CRF2-like [Elaeis guineensis]
LrAP2/ERF07	c133414_g1	633.26	621.26	634.45	343.44	335.47	335.44	464.87	455.87	424.13	gi|341579606|gb|AEK81532.1| ethylene response factor [Ophiopogon japonicus]
LrAP2/ERF08	c132235_g2	111.09	39.68	35.9	108.9	35.44	33.08	136.73	44.48	49.39	gi|1021042279|gb|KZN00060.1| hypothetical protein DCAR_008814 [Daucus carota subsp. sativus]
LrAP2/ERF09	c129075_g3	15.48	10.6	10.81	0.42	0.71	1.24	0.42	0.32	0.23	gi|743862749|ref|XP_010943623.1| PREDICTED: ethylene-responsive transcription factor ERF062-like [Elaeis guineensis]
LrAP2/ERF10	c46322_g1	0.75	0.48	0.44	0	0	0	0	0	0	gi|695069469|ref|XP_009381713.1| PREDICTED: ethylene-responsive transcription factor LEP-like [Musa acuminata subsp. malaccensis]
LrAP2/ERF11	c136977_g1	13.62	6.2	6.43	6.79	2.99	2.42	14.14	3.28	3.63	gi|672178647|ref|XP_008809462.1| PREDICTED: ethylene-responsive transcription factor 2-like [Phoenix dactylifera]
LrAP2/ERF12	c116147_g1	2.11	1.03	1.74	1.45	1.77	1.77	7.88	8.29	5.94	gi|672149842|ref|XP_008797298.1| PREDICTED: ethylene-responsive transcription factor ERF014-like [Phoenix dactylifera]
LrAP2/ERF13	c138175_g1	0	0.73	0.17	0.1	0.77	0.67	0.87	7.95	4.11	gi|743836727|ref|XP_010936186.1| PREDICTED: AP2-like ethylene-responsive transcription factor ANT [Elaeis guineensis]
LrAP2/ERF14	c60158_g1	2.61	0.63	0.86	6.48	1.07	3.28	2.34	0.3	0.27	gi|672173555|ref|XP_008806913.1| PREDICTED: ethylene-responsive transcription factor ERF096-like [Phoenix dactylifera]
LrAP2/ERF15	c128358_g4	16.18	7.21	12.34	8.5	5.41	6.78	11.26	8.84	8.05	gi|695080644|ref|XP_009387797.1| PREDICTED: ethylene-responsive transcription factor RAP2-9-like [Musa acuminata subsp. malaccensis]
LrAP2/ERF16	c124797_g1	1.71	0.55	0.99	4.12	0.72	1.37	0.87	0.39	0.24	gi|743755857|ref|XP_010913767.1| PREDICTED: ethylene-responsive transcription factor ERF061-like [Elaeis guineensis]
LrAP2/ERF17	c148744_g1	108.99	54.96	58.66	62.98	32.3	31.67	183.85	102.41	86.34	gi|743757749|ref|XP_010923453.1| PREDICTED: AP2/ERF and B3 domain-containing transcription factor RAV1-like [Elaeis guineensis]
LrAP2/ERF18	c138447_g2	15.57	7.86	8.06	1	0.71	0.57	3.04	3.32	3.2	gi|695035389|ref|XP_009405112.1| PREDICTED: ethylene-responsive transcription factor ERF114-like [Musa acuminata subsp. malaccensis]
LrAP2/ERF19	c131874_g1	15.38	8.79	9.77	98.11	74.48	72.99	38.94	24.09	24.84	gi|743778496|ref|XP_010919711.1| PREDICTED: ethylene-responsive transcription factor ERF105-like [Elaeis guineensis]
LrAP2/ERF20	c134676_g2	89.67	47.82	48.8	45.96	26.82	29.85	115.24	51.2	50.04	gi|743778500|ref|XP_010919713.1| PREDICTED: ethylene-responsive transcription factor 2 [Elaeis guineensis]
LrAP2/ERF21	c129009_g3	76.48	28.85	31.65	53.56	20.14	23.39	118.72	47.2	50.64	gi|672132333|ref|XP_008789749.1| PREDICTED: ethylene-responsive transcription factor 9-like [Phoenix dactylifera]
LrAP2/ERF22	c75126_g1	34.87	12.66	12.91	6.05	4.56	3.43	11.81	4.98	5.89	gi|147782487|emb|CAN68434.1| hypothetical protein VITISV_002078 [Vitis vinifera]
LrAP2/ERF23	c141436_g1	0.51	0.87	0.85	20.62	16.95	17.06	93.52	60.82	65.03	gi|672169138|ref|XP_008804592.1| PREDICTED: ethylene-responsive transcription factor WIN1-like [Phoenix dactylifera]
LrAP2/ERF24	c131164_g1	4.93	3.64	2.76	24.5	18.31	16.57	24.29	15.83	14.71	gi|695007386|ref|XP_009390239.1| PREDICTED: AP2/ERF and B3 domain-containing transcription repressor RAV2-like [Musa acuminata subsp. malaccensis]
LrAP2/ERF25	c135051_g1	36.29	40.61	45.36	26.52	38.64	38.35	28.75	32.8	29.09	gi|719979388|ref|XP_010249458.1| PREDICTED: ethylene-responsive transcription factor ERF113 [Nelumbo nucifera]
LrAP2/ERF26	c123500_g1	1.66	3.38	2.47	2.03	1.75	2.33	6.12	10.3	8.71	gi|743845261|ref|XP_010938537.1| PREDICTED: AP2-like ethylene-responsive transcription factor At2g41710 isoform X1 [Elaeis guineensis]
LrAP2/ERF27	c114954_g1	0.58	0.68	0.69	16.37	7.87	8.02	24.09	12.49	10.38	gi|98975377|gb|ABF59741.1| CBF-like transcription factor 2 [Elaeis guineensis] gi|98975381|gb|ABF59743.1| CBF-like transcription factor [Attalea bassleriana] gi|98975389|gb|ABF59747.1| CBF-like transcription factor 2 [Rhapidophyllum hystrix] gi|98975393|gb|ABF59749.1| CBF-like transcription factor 2 [Rhapidophyllum hystrix]
LrAP2/ERF28	c121272_g1	19.23	11.3	9.11	10.71	7	4.46	15.15	7.03	7.21	gi|695073457|ref|XP_009383898.1| PREDICTED: ethylene-responsive transcription factor ERF071-like isoform X2 [Musa acuminata subsp. malaccensis]
LrAP2/ERF29	c147472_g4	27.5	22.9	26.21	74.13	53.13	53.82	31.64	21.26	21.08	gi|695049703|ref|XP_009412796.1| PREDICTED: ethylene-responsive transcription factor-like protein At4g13040 isoform X2 [Musa acuminata subsp. malaccensis]
LrAP2/ERF30	c119969_g1	33.82	23.38	22.82	6.44	6.69	4.22	40.33	23.96	27.74	gi|672187048|ref|XP_008813239.1| PREDICTED: pathogenesis-related genes transcriptional activator PTI6-like [Phoenix dactylifera]
LrAP2/ERF31	c115292_g1	1.26	1.61	1.55	0.15	0.06	0.48	1.18	0.51	0.31	gi|743770848|ref|XP_010915710.1| PREDICTED: ethylene-responsive transcription factor CRF2-like [Elaeis guineensis]
LrAP2/ERF32	c119969_g1	33.82	23.38	22.82	6.44	6.69	4.22	40.33	23.96	27.74	gi|672187048|ref|XP_008813239.1| PREDICTED: pathogenesis-related genes transcriptional activator PTI6-like [Phoenix dactylifera]
LrAP2/ERF33	c148744_g1	108.99	54.96	58.66	62.98	32.3	31.67	183.85	102.41	86.34	gi|743757749|ref|XP_010923453.1| PREDICTED: AP2/ERF and B3 domain-containing transcription factor RAV1-like [Elaeis guineensis]
LrAP2/ERF34	c138062_g3	72.87	119.38	127.62	28.48	64.28	61.73	51.21	88.06	90.46	gi|82749740|gb|ABB89754.1| dehydration-responsive element binding protein 3 [Asparagus officinalis]
LrAP2/ERF35	c129075_g1	20.79	13.34	12.32	2.2	1.85	1.79	1.63	0.67	1.47	gi|672206922|ref|XP_008779564.1| PREDICTED: ethylene-responsive transcription factor ERF054-like [Phoenix dactylifera]
LrAP2/ERF36	c144594_g4	6.73	4.81	5.72	6.86	5.03	4.83	15.52	11.15	9.88	gi|695072334|ref|XP_009383284.1| PREDICTED: ethylene-responsive transcription factor ERF069-like [Musa acuminata subsp. malaccensis]
LrAP2/ERF37	c138062_g3	72.87	119.38	127.62	28.48	64.28	61.73	51.21	88.06	90.46	gi|82749740|gb|ABB89754.1| dehydration-responsive element binding protein 3 [Asparagus officinalis]
LrAP2/ERF38	c142262_g1	7.19	4.43	3.8	18.22	7.61	7.4	29.77	10.39	11.45	gi|98975377|gb|ABF59741.1| CBF-like transcription factor 2 [Elaeis guineensis] gi|98975381|gb|ABF59743.1| CBF-like transcription factor [Attalea bassleriana] gi|98975389|gb|ABF59747.1| CBF-like transcription factor 2 [Rhapidophyllum hystrix] gi|98975393|gb|ABF59749.1| CBF-like transcription factor 2 [Rhapidophyllum hystrix]
LrAP2/ERF39	c133414_g1	633.26	621.26	634.45	343.44	335.47	335.44	464.87	455.87	424.13	gi|341579606|gb|AEK81532.1| ethylene response factor [Ophiopogon japonicus]
LrAP2/ERF40	c139627_g6	11.73	5.55	6.34	2.61	1.65	2.82	11.47	7	7.01	gi|743778370|ref|XP_010919644.1| PREDICTED: LOW QUALITY PROTEIN: ethylene-responsive transcription factor ERF038 [Elaeis guineensis]
LrAP2/ERF41	c281155_g1	1.57	5.41	3.12	0.16	1.6	1.47	0.78	1.63	2.77	gi|672168295|ref|XP_008804145.1| PREDICTED: dehydration-responsive element-binding protein 2B-like isoform X2 [Phoenix dactylifera]
LrAP2/ERF42	c142474_g3	59.89	43.28	43.63	36.78	27.21	32.79	70.74	49.15	50.86	gi|743757318|ref|XP_010921469.1| PREDICTED: ethylene-responsive transcription factor ERF073-like [Elaeis guineensis] gi|743757320|ref|XP_010921476.1| PREDICTED: ethylene-responsive transcription factor ERF073-like [Elaeis guineensis] gi|743757322|ref|XP_010921482.1| PREDICTED: ethylene-responsive transcription factor ERF073-like [Elaeis guineensis]
LrAP2/ERF43	c117383_g1	53.37	33.15	33.43	53.52	38.11	34.42	39.35	25.22	24.18	gi|672175980|ref|XP_008808053.1| PREDICTED: AP2-like ethylene-responsive transcription factor AIL1 [Phoenix dactylifera]
LrAP2/ERF44	c119528_g1	0.25	1.54	2.87	0.52	5.85	5.48	0.9	4.08	4.59	gi|743811247|ref|XP_010929116.1| PREDICTED: ethylene-responsive transcription factor ERF003-like [Elaeis guineensis]
LrAP2/ERF45	c147095_g1	56.88	136.43	144.53	17.16	47.81	51.12	39.21	100.4	99.63	gi|672161318|ref|XP_008800471.1| PREDICTED: ethylene-responsive transcription factor 1-like isoform X1 [Phoenix dactylifera]
LrAP2/ERF46	c138175_g1	0	0.73	0.17	0.1	0.77	0.67	0.87	7.95	4.11	gi|743836727|ref|XP_010936186.1| PREDICTED: AP2-like ethylene-responsive transcription factor ANT [Elaeis guineensis]
LrAP2/ERF47	c128117_g1	6.38	3.62	4.14	5.78	3.98	3.17	10.91	5.99	9.48	gi|743770263|ref|XP_010915419.1| PREDICTED: dehydration-responsive element-binding protein 3-like [Elaeis guineensis]
LrAP2/ERF48	c123998_g1	25.57	13.94	10.99	26.05	11.74	11.75	64.31	32.73	33.38	gi|592748063|gb|AHL44126.1| EREB1 [Dendrobium catenatum]
LrAP2/ERF49	c133414_g1	633.26	621.26	634.45	343.44	335.47	335.44	464.87	455.87	424.13	gi|341579606|gb|AEK81532.1| ethylene response factor [Ophiopogon japonicus]
LrAP2/ERF50	c138853_g4	1.17	1.94	1.52	0.26	1.25	1.37	3.68	4.78	6.89	gi|695041392|ref|XP_009408302.1| PREDICTED: ethylene-responsive transcription factor ERF113-like [Musa acuminata subsp. malaccensis]
LrAP2/ERF51	c133112_g5	3.21	1.16	1.35	15.74	9.44	7.67	8.59	3.52	3.83	gi|672205936|ref|XP_008779295.1| PREDICTED: ethylene-responsive transcription factor ERF003-like [Phoenix dactylifera]
LrAP2/ERF52	c138911_g5	0	0	0.08	2.42	1.38	1.33	8.84	4.87	5.03	gi|743860578|ref|XP_010943050.1| PREDICTED: ethylene-responsive transcription factor ERF109-like [Elaeis guineensis]
LrAP2/ERF53	c145332_g2	61.4	32.16	33.55	46.55	23.04	25.65	116.84	65.29	71.13	gi|694994610|ref|XP_009389354.1| PREDICTED: ethylene-responsive transcription factor ERF105-like [Musa acuminata subsp. malaccensis]
LrAP2/ERF54	c135460_g1	8.48	21.55	22.06	3.99	15.12	14.29	11.02	43.14	40.79	gi|743872466|ref|XP_010906558.1| PREDICTED: LOW QUALITY PROTEIN: floral homeotic protein APETALA 2-like [Elaeis guineensis]
LrAP2/ERF55	c144591_g1	0	0.07	0.32	3.05	5.42	3.86	1.59	1.46	1.57	gi|672198778|ref|XP_008777425.1| PREDICTED: AP2-like ethylene-responsive transcription factor ANT [Phoenix dactylifera]
LrAP2/ERF56	c138062_g5	75.96	159.22	155.21	23.04	69.11	70.62	36.05	84.86	83.81	gi|82749740|gb|ABB89754.1| dehydration-responsive element binding protein 3 [Asparagus officinalis]
LrAP2/ERF57	c126682_g1	0.16	0	0	2.27	1	1.73	4.7	3.64	4.29	gi|1026054547|ref|XP_016571789.1| PREDICTED: ethylene-responsive transcription factor 1B-like [Capsicum annuum]
LrAP2/ERF58	c141634_g1	21.58	27.75	32.7	7.85	12.02	16.27	15	19.02	18.71	gi|743781999|ref|XP_010921034.1| PREDICTED: dehydration-responsive element-binding protein 2B-like isoform X1 [Elaeis guineensis]
LrAP2/ERF59	c140595_g1	3.99	2.15	3.02	5.33	4.28	3.98	21.22	16.9	16.69	gi|209892789|gb|ACI95260.1| dehydration-responsive element binding protein [Aloe vera]
LrAP2/ERF60	c123998_g1	25.57	13.94	10.99	26.05	11.74	11.75	64.31	32.73	33.38	gi|592748063|gb|AHL44126.1| EREB1 [Dendrobium catenatum]
LrAP2/ERF61	c140974_g2	34.82	29.21	32.37	15.71	16.74	17.26	4.31	3.43	2.04	gi|743844543|ref|XP_010938373.1| PREDICTED: ethylene-responsive transcription factor ERF071-like [Elaeis guineensis]
LrAP2/ERF62	c123998_g1	25.57	13.94	10.99	26.05	11.74	11.75	64.31	32.73	33.38	gi|592748063|gb|AHL44126.1| EREB1 [Dendrobium catenatum]
LrAP2/ERF63	c138853_g4	1.17	1.94	1.52	0.26	1.25	1.37	3.68	4.78	6.89	gi|695041392|ref|XP_009408302.1| PREDICTED: ethylene-responsive transcription factor ERF113-like [Musa acuminata subsp. malaccensis]
LrAP2/ERF64	c137927_g1	22.72	25.11	22.48	9.5	9.21	13.27	15.7	25.14	20.94	gi|1012306317|gb|AMS25572.1| APETALA2-like protein, partial [Hypoxis decumbens]
LrAP2/ERF65	c138062_g6	1.96	6.54	6.53	0.13	2.9	1.71	1.21	5.45	3.97	gi|82749740|gb|ABB89754.1| dehydration-responsive element binding protein 3 [Asparagus officinalis]
LrAP2/ERF66	c138853_g4	1.17	1.94	1.52	0.26	1.25	1.37	3.68	4.78	6.89	gi|695041392|ref|XP_009408302.1| PREDICTED: ethylene-responsive transcription factor ERF113-like [Musa acuminata subsp. malaccensis]
LrAP2/ERF67	c138853_g1	5.63	5.15	4.49	3.86	3.56	4	5.74	5.35	7.93	gi|743772122|ref|XP_010916360.1| PREDICTED: ethylene-responsive transcription factor ERF073-like [Elaeis guineensis]
LrAP2/ERF68	c129009_g4	37.09	17.38	21.14	31.89	13.51	15.06	72.33	40.03	36.19	gi|743758811|ref|XP_010928933.1| PREDICTED: ethylene-responsive transcription factor 9 [Elaeis guineensis]
LrAP2/ERF69	c46322_g1	0.75	0.48	0.44	0	0	0	0	0	0	gi|695069469|ref|XP_009381713.1| PREDICTED: ethylene-responsive transcription factor LEP-like [Musa acuminata subsp. malaccensis]
LrAP2/ERF70	c132078_g2	11.41	19.31	20.57	2.01	3.31	3.72	6.36	14.86	12.76	gi|672164886|ref|XP_008802331.1| PREDICTED: floral homeotic protein APETALA 2-like [Phoenix dactylifera]
LrAP2/ERF71	c139522_g2	7.89	6.23	4.68	10.7	5.14	3.87	20.21	8.28	10.83	gi|743824827|ref|XP_010932878.1| PREDICTED: LOW QUALITY PROTEIN: ethylene-responsive transcription factor 3-like [Elaeis guineensis]
LrAP2/ERF72	c139645_g1	6.18	7.26	6.15	1.24	1.98	1.99	8.27	9.74	11.01	gi|476001799|gb|AGI62041.1| AP2-5 [Erycina pusilla]
LrAP2/ERF73	c141634_g1	21.58	27.75	32.7	7.85	12.02	16.27	15	19.02	18.71	gi|743781999|ref|XP_010921034.1| PREDICTED: dehydration-responsive element-binding protein 2B-like isoform X1 [Elaeis guineensis]
LrAP2/ERF74	c138062_g3	72.87	119.38	127.62	28.48	64.28	61.73	51.21	88.06	90.46	gi|82749740|gb|ABB89754.1| dehydration-responsive element binding protein 3 [Asparagus officinalis]
LrAP2/ERF75	c145332_g2	61.4	32.16	33.55	46.55	23.04	25.65	116.84	65.29	71.13	gi|694994610|ref|XP_009389354.1| PREDICTED: ethylene-responsive transcription factor ERF105-like [Musa acuminata subsp. malaccensis]
LrAP2/ERF76	c132078_g2	11.41	19.31	20.57	2.01	3.31	3.72	6.36	14.86	12.76	gi|672164886|ref|XP_008802331.1| PREDICTED: floral homeotic protein APETALA 2-like [Phoenix dactylifera]
LrAP2/ERF77	c139645_g1	6.18	7.26	6.15	1.24	1.98	1.99	8.27	9.74	11.01	gi|476001799|gb|AGI62041.1| AP2-5 [Erycina pusilla]
LrAP2/ERF78	c90811_g1	1.25	1.02	0.84	0	0	0	0.08	0.18	0	gi|672168385|ref|XP_008804192.1| PREDICTED: AP2-like ethylene-responsive transcription factor BBM [Phoenix dactylifera]
LrAP2/ERF79	c148167_g1	118	109.01	112.78	71.92	69.55	64.51	68.99	70.05	64.85	gi|922367760|ref|XP_013456046.1| AP2-like ethylene-responsive transcription factor [Medicago truncatula] gi|657388078|gb|KEH30077.1| AP2-like ethylene-responsive transcription factor [Medicago truncatula]
LrAP2/ERF80	c135849_g4	1.2	0.16	0.74	1.66	0.85	0.96	0.67	0.23	0.36	gi|743777560|ref|XP_010919217.1| PREDICTED: ethylene-responsive transcription factor ERF027-like [Elaeis guineensis]

## Sheet: Table S1c
Table S1c. Chacteristics of LrAP2/ERF genes identified from Lycoris aurea transcriptome.
Gene name	Lycoris aurea gene ID	CK_rawfragments(8253933)	CK_FPKM	TREAT_rawfragments(8017301)	TREAT_FPKM	Nr-annotation
LrAP2/ERF01	CL3359.Contig1_All	23	2.6488	25	2.9641	PREDICTED: AP2-like ethylene-responsive transcription factor ANT-like [Vitis vinifera]
LrAP2/ERF02	CL6771.Contig1_All	123	18.063	168	25.3996	ethylene response factor 7, partial [Diospyros kaki]
LrAP2/ERF03	Unigene25595_All	5	2.3944	14	6.9021	PREDICTED: ethylene-responsive transcription factor 12-like [Solanum lycopersicum]
LrAP2/ERF04	Unigene28457_All	1	0.133	120	16.4299	AP2/ERF domain-containing transcription factor [Populus trichocarpa] >gi|222866219|gb|EEF03350.1| AP2/ERF domain-containing transcription factor [Populus trichocarpa]
LrAP2/ERF05	CL10972.Contig2_All	152	19.6746	145	19.3225	putative AP2/EREBP transcription factor superfamily protein [Zea mays]
LrAP2/ERF06	CL5097.Contig2_All	72	13.9347	77	15.3422	PREDICTED: ethylene-responsive transcription factor CRF4-like [Glycine max]
LrAP2/ERF07	CL3736.Contig2_All	919	68.4753	902	69.1923	ethylene response factor [Ophiopogon japonicus]
LrAP2/ERF08	Unigene27337_All	6	2.7124	15	6.9812	ethylene response factor 2, partial [Diospyros kaki]
LrAP2/ERF09	Unigene792_All	14	5.1399	18	6.8035	--
LrAP2/ERF10	Unigene25595_All	5	2.3944	14	6.9021	PREDICTED: ethylene-responsive transcription factor 12-like [Solanum lycopersicum]
LrAP2/ERF11	CL8482.Contig1_All	15	3.0698	66	13.9057	hypothetical protein VITISV_028134 [Vitis vinifera]
LrAP2/ERF12	CL10671.Contig1_All	82	10.8457	260	35.4038	dehydration-responsive element binding protein 6 [Glycine max] >gi|146552062|gb|ABQ42205.1| dehydration-responsive element binding protein 6 [Glycine max]
LrAP2/ERF13	CL3359.Contig1_All	23	2.6488	25	2.9641	PREDICTED: AP2-like ethylene-responsive transcription factor ANT-like [Vitis vinifera]
LrAP2/ERF14	CL1358.Contig1_All	13	4.7727	0	0	PREDICTED: ethylene-responsive transcription factor ERF098-like [Cucumis sativus]
LrAP2/ERF15	Unigene6629_All	41	10.9413	34	9.341	ethylene response factor 2, partial [Diospyros kaki]
LrAP2/ERF16	Unigene24976_All	4	0.7717	40	7.9446	PREDICTED: ethylene-responsive transcription factor ERF061-like [Solanum lycopersicum]
LrAP2/ERF17	Unigene3045_All	75	7.1717	140	13.7823	RAV transcription factor [Camellia sinensis]
LrAP2/ERF18	Unigene1570_All	12	4.2635	7	2.5604	PREDICTED: ethylene-responsive transcription factor ERF114-like [Vitis vinifera]
LrAP2/ERF19	CL10216.Contig2_All	407	34.652	486	42.5994	ethylene response factor 11 [Actinidia deliciosa]
LrAP2/ERF20	CL10972.Contig2_All	152	19.6746	145	19.3225	putative AP2/EREBP transcription factor superfamily protein [Zea mays]
LrAP2/ERF21	CL238.Contig2_All	132	15.6788	702	85.8438	ethylene-responsive element binding factor 4 [Glycine max] >gi|190361125|gb|ACE76905.1| ethylene-responsive element binding factor 4 [Glycine max]
LrAP2/ERF22	Unigene4463_All	7	2.7897	10	4.103	unnamed protein product [Vitis vinifera]
LrAP2/ERF23	Unigene6008_All	21	6.713	15	4.9366	PREDICTED: ethylene-responsive transcription factor WIN1-like [Glycine max]
LrAP2/ERF24	Unigene9000_All	75	9.4357	228	29.5312	RAV [Nicotiana tabacum]
LrAP2/ERF25	CL1460.Contig1_All	26	6.8928	23	6.2775	AP2 domain transcription factor RAP2.3, putative [Ricinus communis] >gi|223548630|gb|EEF50121.1| AP2 domain transcription factor RAP2.3, putative [Ricinus communis]
LrAP2/ERF26	Unigene2452_All	26	5.3939	31	6.621	PREDICTED: AP2-like ethylene-responsive transcription factor At2g41710-like [Fragaria vesca subsp. vesca]
LrAP2/ERF27	CL3370.Contig1_All	9	1.3528	133	20.582	CBF-like transcription factor [Sabal palmetto]
LrAP2/ERF28	Unigene8550_All	206	50.0156	275	68.7391	uncharacterized protein LOC100527371 [Glycine max]
LrAP2/ERF29	CL465.Contig10_All	120	11.4386	139	13.6408	hypothetical protein VITISV_009902 [Vitis vinifera]
LrAP2/ERF30	CL5097.Contig2_All	72	13.9347	77	15.3422	PREDICTED: ethylene-responsive transcription factor CRF4-like [Glycine max]
LrAP2/ERF31	CL5097.Contig2_All	72	13.9347	77	15.3422	PREDICTED: ethylene-responsive transcription factor CRF4-like [Glycine max]
LrAP2/ERF32	CL5097.Contig2_All	72	13.9347	77	15.3422	PREDICTED: ethylene-responsive transcription factor CRF4-like [Glycine max]
LrAP2/ERF33	CL485.Contig6_All	106	7.9865	138	10.7045	RAV transcription factor [Capsicum annuum]
LrAP2/ERF34	CL330.Contig3_All	828	70.6449	1129	99.1693	dehydration-responsive element binding protein 3 [Asparagus officinalis]
LrAP2/ERF35	Unigene1856_All	34	3.6779	62	6.9047	hypothetical protein SORBIDRAFT_04g027180 [Sorghum bicolor] >gi|241934065|gb|EES07210.1| hypothetical protein SORBIDRAFT_04g027180 [Sorghum bicolor]
LrAP2/ERF36	CL5097.Contig2_All	72	13.9347	77	15.3422	PREDICTED: ethylene-responsive transcription factor CRF4-like [Glycine max]
LrAP2/ERF37	CL330.Contig3_All	828	70.6449	1129	99.1693	dehydration-responsive element binding protein 3 [Asparagus officinalis]
LrAP2/ERF38	CL3370.Contig1_All	9	1.3528	133	20.582	CBF-like transcription factor [Sabal palmetto]
LrAP2/ERF39	CL3736.Contig2_All	919	68.4753	902	69.1923	ethylene response factor [Ophiopogon japonicus]
LrAP2/ERF40	CL10671.Contig1_All	82	10.8457	260	35.4038	dehydration-responsive element binding protein 6 [Glycine max] >gi|146552062|gb|ABQ42205.1| dehydration-responsive element binding protein 6 [Glycine max]
LrAP2/ERF41	CL10153.Contig2_All	6	0.6288	82	8.8476	ERF transcription factor ERF1 [Camellia sinensis]
LrAP2/ERF42	CL5056.Contig2_All	192	14.8637	200	15.94	PREDICTED: ethylene-responsive transcription factor ERF118-like [Cucumis sativus]
LrAP2/ERF43	CL6055.Contig2_All	29	3.3751	27	3.2351	aintegumenta-like protein [Triticum aestivum]
LrAP2/ERF44	Unigene13369_All	21	4.2977	117	24.6511	AP2/ERF domain-containing transcription factor [Populus trichocarpa] >gi|222865751|gb|EEF02882.1| AP2/ERF domain-containing transcription factor [Populus trichocarpa]
LrAP2/ERF45	CL3830.Contig3_All	889	74.4342	869	74.9071	AP2 domain class transcription factor [Malus x domestica]
LrAP2/ERF46	CL3359.Contig1_All	23	2.6488	25	2.9641	PREDICTED: AP2-like ethylene-responsive transcription factor ANT-like [Vitis vinifera]
LrAP2/ERF47	Unigene2529_All	10	4.3115	13	5.7704	Transcriptional factor TINY, putative [Ricinus communis] >gi|223546702|gb|EEF48200.1| Transcriptional factor TINY, putative [Ricinus communis]
LrAP2/ERF48	Unigene3709_All	98	12.2783	94	12.1248	PREDICTED: ethylene-responsive transcription factor 7-like [Cucumis sativus]
LrAP2/ERF49	CL3736.Contig2_All	919	68.4753	902	69.1923	ethylene response factor [Ophiopogon japonicus]
LrAP2/ERF50	Unigene1945_All	136	13.708	940	97.5428	PREDICTED: uncharacterized protein LOC100262406 [Vitis vinifera] >gi|147834261|emb|CAN66025.1| hypothetical protein VITISV_028773 [Vitis vinifera]
LrAP2/ERF51	Unigene13369_All	21	4.2977	117	24.6511	AP2/ERF domain-containing transcription factor [Populus trichocarpa] >gi|222865751|gb|EEF02882.1| AP2/ERF domain-containing transcription factor [Populus trichocarpa]
LrAP2/ERF52	Unigene28642_All	15	1.917	316	41.5768	predicted protein [Hordeum vulgare subsp. vulgare]
LrAP2/ERF53	CL7857.Contig4_All	113	6.347	76	4.3948	ethylene-responsive transcription factor ERF105 [Arabidopsis thaliana] >gi|75248477|sp|Q8VY90.1|EF105_ARATH RecName: Full=Ethylene-responsive transcription factor ERF105 >gi|332008667|gb|AED96050.1| ethylene-responsive transcription factor ERF105 [Arabidopsis thaliana]
LrAP2/ERF54	CL1123.Contig4_All	61	6.8366	58	6.6923	H0721B11.5 [Oryza sativa Indica Group]
LrAP2/ERF55	CL3359.Contig1_All	23	2.6488	25	2.9641	PREDICTED: AP2-like ethylene-responsive transcription factor ANT-like [Vitis vinifera]
LrAP2/ERF56	CL330.Contig3_All	828	70.6449	1129	99.1693	dehydration-responsive element binding protein 3 [Asparagus officinalis]
LrAP2/ERF57	Unigene11154_All	14	4.7645	8	2.8029	PREDICTED: ethylene-responsive transcription factor 1B-like [Glycine max]
LrAP2/ERF58	CL10153.Contig2_All	6	0.6288	82	8.8476	ERF transcription factor ERF1 [Camellia sinensis]
LrAP2/ERF59	CL5787.Contig1_All	48	11.7246	74	18.6089	dehydration-responsive element binding protein 6 [Glycine max] >gi|146552062|gb|ABQ42205.1| dehydration-responsive element binding protein 6 [Glycine max]
LrAP2/ERF60	Unigene3709_All	98	12.2783	94	12.1248	PREDICTED: ethylene-responsive transcription factor 7-like [Cucumis sativus]
LrAP2/ERF61	CL10494.Contig1_All	146	22.5332	90	14.3003	PREDICTED: ethylene-responsive transcription factor RAP2-3-like isoform 2 [Glycine max]
LrAP2/ERF62	CL6771.Contig1_All	123	18.063	168	25.3996	ethylene response factor 7, partial [Diospyros kaki]
LrAP2/ERF63	Unigene29013_All	23	4.4161	24	4.7441	unnamed protein product [Vitis vinifera]
LrAP2/ERF64	CL10155.Contig1_All	38	3.4306	63	5.8554	transcription factor APETALA2 [Vitis vinifera]
LrAP2/ERF65	CL330.Contig3_All	828	70.6449	1129	99.1693	dehydration-responsive element binding protein 3 [Asparagus officinalis]
LrAP2/ERF66	Unigene26636_All	11	2.063	34	6.5648	PREDICTED: uncharacterized protein LOC100262406 [Vitis vinifera] >gi|147834261|emb|CAN66025.1| hypothetical protein VITISV_028773 [Vitis vinifera]
LrAP2/ERF67	CL5056.Contig2_All	192	14.8637	200	15.94	PREDICTED: ethylene-responsive transcription factor ERF118-like [Cucumis sativus]
LrAP2/ERF68	Unigene13508_All	25	3.6015	175	25.9546	AP2/ERF domain protein [Oryza sativa Japonica Group]
LrAP2/ERF69	Unigene25595_All	5	2.3944	14	6.9021	PREDICTED: ethylene-responsive transcription factor 12-like [Solanum lycopersicum]
LrAP2/ERF70	CL5239.Contig3_All	37	2.6956	59	4.4252	APETALA2 protein homolog HAP2 [Hyacinthus orientalis]
LrAP2/ERF71	Unigene4463_All	7	2.7897	10	4.103	unnamed protein product [Vitis vinifera]
LrAP2/ERF72	CL6411.Contig1_All	255	20.2985	236	19.3406	AP2/EREBP transcriptional factor WRI1 [Jatropha curcas]
LrAP2/ERF73	CL10153.Contig2_All	6	0.6288	82	8.8476	ERF transcription factor ERF1 [Camellia sinensis]
LrAP2/ERF74	CL330.Contig3_All	828	70.6449	1129	99.1693	dehydration-responsive element binding protein 3 [Asparagus officinalis]
LrAP2/ERF75	CL7857.Contig3_All	8	0.8263	17	1.8077	ethylene-responsive transcription factor ERF105 [Arabidopsis thaliana] >gi|75248477|sp|Q8VY90.1|EF105_ARATH RecName: Full=Ethylene-responsive transcription factor ERF105 >gi|332008667|gb|AED96050.1| ethylene-responsive transcription factor ERF105 [Arabidopsis thaliana]
LrAP2/ERF76	CL5239.Contig3_All	37	2.6956	59	4.4252	APETALA2 protein homolog HAP2 [Hyacinthus orientalis]
LrAP2/ERF77	CL6411.Contig1_All	255	20.2985	236	19.3406	AP2/EREBP transcriptional factor WRI1 [Jatropha curcas]
LrAP2/ERF78	CL4683.Contig6_All	14	0.9238	36	2.4457	PREDICTED: peptide chain release factor 1-like [Glycine max]
LrAP2/ERF79	CL1123.Contig4_All	61	6.8366	58	6.6923	H0721B11.5 [Oryza sativa Indica Group]
LrAP2/ERF80	Unigene28629_All	8	1.2703	148	24.1941	LhCBF1 [Lycopersicon hirsutum]
