# Supplementary material for: Functional Characterization of AP2/ERF Transcription Factors during Flower Development and Anthocyanin Biosynthesis Related Candidate Genes in Lycoris
Source: Int J Mol Sci. 2023 Sep 23;24(19):14464. doi: 10.3390/ijms241914464 (PMC10572147; doi:10.3390/ijms241914464)
Supplement: Supplementary file 1 [file ijms-24-14464-s001.zip › Table S2.xlsx]

## Sheet: Table S2
Table S2. The Pearson’s correlation coefficients of LrAP2/ERFs with anthocyanin biosynthesis pathway in L. radiata.
Gene ID	LrAP2/ERF01	LrAP2/ERF02	LrAP2/ERF03	LrAP2/ERF04	LrAP2/ERF05	LrAP2/ERF06	LrAP2/ERF07	LrAP2/ERF09	LrAP2/ERF10	LrAP2/ERF11	LrAP2/ERF12	LrAP2/ERF13	LrAP2/ERF14	LrAP2/ERF15	LrAP2/ERF16	LrAP2/ERF17	LrAP2/ERF18	LrAP2/ERF19	LrAP2/ERF20	LrAP2/ERF21	LrAP2/ERF22	LrAP2/ERF23	LrAP2/ERF24	LrAP2/ERF25	LrAP2/ERF26	LrAP2/ERF27	LrAP2/ERF28	LrAP2/ERF29	LrAP2/ERF30	LrAP2/ERF31	LrAP2/ERF32	LrAP2/ERF33	LrAP2/ERF36	LrAP2/ERF37	LrAP2/ERF38	LrAP2/ERF39	LrAP2/ERF40	LrAP2/ERF41	LrAP2/ERF42	LrAP2/ERF44	LrAP2/ERF46	LrAP2/ERF48	LrAP2/ERF49	LrAP2/ERF51	LrAP2/ERF52	LrAP2/ERF53	LrAP2/ERF54	LrAP2/ERF55	LrAP2/ERF56
Cyanidin-3-O-(6"-O-acetyl-2"-O-xylosyl)glucoside	-0.22062	0.691096	-0.499263	0.72244	0.315034	-0.49383	-0.139839	0.310341	-0.0425975	-0.615085	0.863483	-0.22062	0.689785	0.38595	0.783537	0.133296	-0.0426241	-0.530905	0.315034	0.55877	0.558519	-0.199867	0.540282	0.595996	0.193984	0.793598	0.757021	0.780819	-0.0953494	-0.49383	0.753329	-0.337641	0.766484	0.118718	0.754484	-0.139839	-0.289577	0.144744	0.367386	-0.221721	-0.22062	0.538479	-0.139839	-0.221721	0.657179	0.54726	-0.706852	-0.22062	0.152247
Cyanidin-3-O-(2''-O-glucosyl)glucoside	0.0113991	-0.213517	-0.0734569	-0.102129	0.349068	-0.0319885	-0.3646	-0.0534213	0.151518	0.476832	-0.309965	0.0113991	-0.668495	-0.347659	-0.20706	-0.023634	-0.463331	0.0721459	0.349068	-0.26829	-0.566087	-0.266043	-0.377774	-0.352058	-0.70595	-0.612218	-0.551773	-0.300754	0.578001	-0.0319885	-0.472441	0.457221	-0.160175	-0.752962	-0.477589	-0.3646	-0.0600044	0.31574	0.425816	-0.446793	0.0113991	-0.798368	-0.3646	-0.446793	-0.318739	0.108089	0.166753	0.0113991	0.287515
Cyanidin-3-O-(6''-O-caffeoyl-2''-O-xylosyl)glucoside	-0.00880246	-0.145427	-0.025805	-0.245798	0.16428	-0.0972161	-0.421788	-0.072201	0.154588	0.315167	-0.365781	-0.00880246	-0.838631	-0.353212	-0.213364	-0.230382	-0.44055	0.0342202	0.16428	-0.230101	-0.395588	-0.321289	-0.465974	-0.579687	-0.761322	-0.615691	-0.754542	-0.513837	0.370272	-0.0972161	-0.410382	0.493834	-0.233436	-0.713022	-0.476316	-0.421788	-0.0489722	0.418695	0.334857	-0.238471	-0.00880246	-0.631316	-0.421788	-0.238471	-0.40655	-0.0064374	0.145351	-0.00880246	0.381837
Cyanidin-3-O-(6''-O-caffeoyl)glucoside	-0.447376	0.548533	-0.564931	0.397822	0.565165	-0.680444	-0.632691	0.356643	-0.0372671	-0.236047	0.310683	-0.447376	-0.473116	-0.0103145	0.465117	-0.392743	-0.492398	-0.593825	0.565165	0.184579	0.0347472	-0.530142	-0.00124404	-0.208974	-0.939288	-0.191376	-0.464666	-0.0615725	0.189908	-0.680444	0.114292	0.17348	0.335931	-0.831718	-0.00050374	-0.632691	-0.552291	0.841574	0.721081	-0.555063	-0.447376	-0.211419	-0.632691	-0.555063	0.00370127	0.441991	-0.412878	-0.447376	0.741727
Cyanidin-3-O-(6''-O-feruloyl)glucoside-5-O-glucoside	-0.439717	0.844246	-0.381104	0.441097	0.0492589	-0.708657	-0.26411	0.343497	-0.17417	-0.889569	0.683571	-0.439717	0.216138	0.462567	0.720683	-0.407064	0.113338	-0.641406	0.0492589	0.588167	0.857233	-0.2219	0.383716	0.110989	-0.137359	0.595982	0.0803367	0.17737	-0.594173	-0.708657	0.742404	-0.296086	0.511489	0.115335	0.618898	-0.26411	-0.477088	0.503934	0.195966	0.105579	-0.439717	0.862807	-0.26411	0.105579	0.393937	0.303438	-0.631688	-0.439717	0.521957
Cyanidin-3-O-(6''-O-p-coumaroyl-2''-O-xylosyl)glucoside	-0.201376	-0.00834285	-0.492318	0.56145	0.772864	0.00789013	0.0241538	0.319689	-0.133003	0.382153	0.255964	-0.201376	0.311095	0.00473211	0.135057	0.27407	-0.290079	-0.213768	0.772864	-0.199107	-0.58314	-0.111002	0.307936	0.525884	-0.203093	-0.178848	0.418637	0.611091	0.66629	0.00789013	-0.203232	-0.149976	0.280382	-0.483876	-0.119087	0.0241538	-0.20169	-0.00471175	0.475542	-0.819411	-0.201376	-0.62305	0.0241538	-0.819411	0.10645	0.407276	-0.057508	-0.201376	-0.164492
Cyanidin-3-O-(6''-O-p-coumaroyl-2'''-O-sinapoyl)sambubioside-5-O-(6''''-O-malonyl)glucoside	-0.297801	0.137297	-0.437347	0.30593	0.669133	-0.32214	-0.41255	0.257613	-0.0233702	0.265697	0.0666567	-0.297801	-0.4003	-0.116441	0.133179	-0.121821	-0.497966	-0.306884	0.669133	-0.126048	-0.447832	-0.362241	-0.0644445	-0.0623538	-0.818021	-0.466213	-0.349078	0.000439252	0.545982	-0.32214	-0.243261	0.212355	0.142784	-0.865558	-0.299253	-0.41255	-0.355477	0.537757	0.657253	-0.73691	-0.297801	-0.661685	-0.41255	-0.73691	-0.152282	0.339209	-0.0977587	-0.297801	0.398087
Cyanidin-3-O-(6''-O-p-Coumaroyl)glucoside	-0.117521	0.0831358	-0.390497	0.285644	0.625274	-0.26497	-0.490353	0.129739	0.14386	0.307898	0.0475038	-0.117521	-0.393961	-0.248932	0.150493	0.0552965	-0.628724	-0.223018	0.625274	-0.0736622	-0.474273	-0.430008	-0.166993	-0.0704906	-0.73309	-0.380615	-0.241753	0.0785127	0.69232	-0.26497	-0.202711	0.339308	0.215574	-0.884587	-0.232951	-0.490353	-0.246312	0.474356	0.713075	-0.726114	-0.117521	-0.750704	-0.490353	-0.726114	-0.0652383	0.400927	-0.153116	-0.117521	0.376175
Cyanidin-3-O-(6''-O-p-hydroxybenzoyl)sophoroside-5-O-glucoside	-0.249863	0.761416	-0.50295	0.722774	0.296615	-0.564828	-0.196063	0.312925	-0.039545	-0.699268	0.882056	-0.249863	0.623203	0.406589	0.821924	0.0638447	-0.039244	-0.568942	0.296615	0.60487	0.638104	-0.231856	0.527577	0.533097	0.130899	0.806383	0.678359	0.732185	-0.156997	-0.564828	0.803184	-0.317353	0.784307	0.106085	0.775348	-0.196063	-0.331415	0.220331	0.381243	-0.176312	-0.249863	0.599634	-0.196063	-0.176312	0.65281	0.56389	-0.741028	-0.249863	0.238581
Cyanidin-3-O-[6''-O-(E)-p-coumaroyl-2''-O-xylosyl]glucoside-5-O-glucoside	-0.252837	-0.342808	-0.0662948	-0.245901	0.0727378	0.103114	-0.0311338	0.145758	-0.256124	0.403509	-0.436433	-0.252837	-0.495603	-0.204696	-0.405609	-0.375681	-0.117628	-0.0765352	0.0727378	-0.555387	-0.570123	0.0456748	-0.349494	-0.405656	-0.586078	-0.766343	-0.668498	-0.573982	0.0507589	0.103114	-0.586253	0.0454417	-0.481544	-0.466587	-0.69306	-0.0311338	-0.206468	0.155376	0.0158127	-0.340518	-0.252837	-0.529907	-0.0311338	-0.340518	-0.632408	-0.289271	0.33165	-0.252837	0.121657
Cyanidin-3-O-glucoside (Kuromanin)	0.0634351	-0.297328	0.00870728	-0.156977	0.309358	0.0413007	-0.299714	-0.0960858	0.160996	0.553531	-0.398111	0.0634351	-0.65792	-0.402644	-0.293864	0.0232882	-0.415452	0.165089	0.309358	-0.310682	-0.614288	-0.191084	-0.396545	-0.347124	-0.648397	-0.658456	-0.559387	-0.336839	0.576901	0.0413007	-0.531974	0.461585	-0.230391	-0.693207	-0.524422	-0.299714	0.00969582	0.252695	0.351284	-0.413565	0.0634351	-0.832907	-0.299714	-0.413565	-0.342179	0.0402598	0.249096	0.0634351	0.210006
Cyanidin-3-O-sambubioside [Cyanidin-3-O-(2''-O-xylosyl)glucoside]	-0.285209	0.751452	-0.555769	0.753539	0.356248	-0.567362	-0.189258	0.359537	-0.0718305	-0.659256	0.895234	-0.285209	0.643458	0.400243	0.830219	0.0681655	-0.0635985	-0.599319	0.356248	0.572457	0.578029	-0.233933	0.551355	0.568392	0.103962	0.775523	0.696861	0.759921	-0.119231	-0.567362	0.759088	-0.341167	0.782101	0.0538221	0.75345	-0.189258	-0.36511	0.227814	0.416501	-0.257272	-0.285209	0.54942	-0.189258	-0.257272	0.647099	0.577862	-0.738033	-0.285209	0.233521
Cyanidin-3-O-sophoroside-5-O-glucoside	0.563694	-0.669913	0.44904	-0.535518	-0.157005	0.466866	-0.142748	-0.522164	0.448482	0.70506	-0.720672	0.563694	-0.621025	-0.648147	-0.586489	0.330704	-0.329441	0.630122	-0.157005	-0.346238	-0.629805	-0.00396255	-0.631224	-0.458394	-0.160934	-0.551554	-0.414346	-0.431257	0.602027	0.466866	-0.586659	0.652526	-0.416702	-0.298818	-0.514098	-0.142748	0.511582	-0.188416	0.000591724	0.0158856	0.563694	-0.835374	-0.142748	0.0158856	-0.35662	-0.188287	0.426658	0.563694	-0.11605
Delphinidin-3-O-glucoside (Mirtillin)	0.493717	-0.8973	0.602258	-0.68673	-0.290859	0.762774	0.286399	-0.460422	0.195435	0.836479	-0.830552	0.493717	-0.368886	-0.452826	-0.839824	0.287098	0.0294828	0.766182	-0.290859	-0.56067	-0.733451	0.352223	-0.472722	-0.288121	0.163417	-0.63233	-0.29576	-0.456541	0.392848	0.762774	-0.774389	0.361451	-0.6858	0.0546993	-0.656697	0.286399	0.554579	-0.504299	-0.384879	0.143397	0.493717	-0.711213	0.286399	0.143397	-0.504598	-0.47323	0.73043	0.493717	-0.463694
Delphinidin-3,5,3'-Tri-O-glucoside	0.704516	-0.712165	0.437506	-0.30407	-0.233135	0.706016	0.294259	-0.479906	0.379582	0.610156	-0.430246	0.704516	0.164204	-0.431731	-0.490569	0.718034	-0.0520143	0.708216	-0.233135	-0.288724	-0.506663	0.252155	-0.248208	0.106143	0.590797	-0.0467668	0.441422	0.188699	0.526956	0.706016	-0.329421	0.270591	-0.213253	0.262909	-0.157503	0.294259	0.691419	-0.737738	-0.245285	0.139376	0.704516	-0.537146	0.294259	0.139376	-0.00548321	-0.157103	0.367483	0.704516	-0.660137
Malvidin-3-O-(6''-O-malonyl)glucoside	0.286939	-0.144777	0.461526	-0.330716	-0.686501	0.312513	0.417519	-0.266221	0.015634	-0.256709	-0.0846377	0.286939	0.3779	0.138408	-0.156231	0.0988083	0.523878	0.320096	-0.686501	0.117456	0.455909	0.381658	0.0514371	0.0449014	0.798456	0.441813	0.30663	-0.048491	-0.569354	0.312513	0.235987	-0.204939	-0.170316	0.875333	0.274183	0.417519	0.363245	-0.52958	-0.670735	0.752781	0.286939	0.670459	0.417519	0.752781	0.117239	-0.366904	0.116435	0.286939	-0.389001
Pelargonidin-3-O-glucoside-5-O-arabinoside	-0.410845	0.897909	-0.725855	0.833104	0.607509	-0.827463	-0.532286	0.422681	-0.0111668	-0.630939	0.901312	-0.410845	0.273184	0.279079	0.940786	-0.0716282	-0.348488	-0.759799	0.607509	0.60998	0.489639	-0.497461	0.422479	0.374133	-0.404115	0.567436	0.350636	0.618004	0.0744773	-0.827463	0.692713	-0.126697	0.852921	-0.415218	0.649976	-0.532286	-0.546429	0.618604	0.764598	-0.520955	-0.410845	0.303014	-0.532286	-0.520955	0.58181	0.75322	-0.846709	-0.410845	0.598425
Peonidin-3-O-(6''-O-caffeoyl)glucoside	-0.338289	0.764227	-0.633108	0.66175	0.668417	-0.812508	-0.745982	0.315193	0.126587	-0.408716	0.641012	-0.338289	-0.185917	0.0405646	0.768778	-0.12012	-0.566022	-0.648039	0.668417	0.505654	0.258085	-0.609175	0.143151	0.0696608	-0.777458	0.225385	-0.061925	0.313593	0.307766	-0.812508	0.456239	0.180258	0.707826	-0.74228	0.393173	-0.745982	-0.523533	0.816866	0.909972	-0.634338	-0.338289	-0.0673834	-0.745982	-0.634338	0.399152	0.731732	-0.726753	-0.338289	0.788708
Peonidin-3-O-(6''-O-p-Coumaroyl)glucoside	-0.373151	0.391558	-0.556592	0.464611	0.72134	-0.531774	-0.558146	0.324505	-0.007219	0.0137139	0.288296	-0.373151	-0.360843	-0.0427549	0.379843	-0.170697	-0.540536	-0.485223	0.72134	0.0892554	-0.206632	-0.487601	0.0191027	-0.0312061	-0.880468	-0.252319	-0.294997	0.0998315	0.462497	-0.531774	-0.00956025	0.18561	0.351189	-0.885865	-0.0687698	-0.558146	-0.485137	0.69281	0.785781	-0.750648	-0.373151	-0.459582	-0.558146	-0.750648	0.0405912	0.503994	-0.333228	-0.373151	0.591442
Petunidin-3-O-glucoside	-0.0494143	0.443358	0.173262	-0.131611	-0.410274	-0.362006	-0.286636	-0.0578023	0.078614	-0.688327	0.0948875	-0.0494143	-0.297355	0.0614183	0.255924	-0.3819	0.13991	-0.17314	-0.410274	0.468401	0.774592	-0.102492	-0.0898383	-0.416405	-0.13191	0.327454	-0.405023	-0.404455	-0.640885	-0.362006	0.473379	0.0625321	0.0945335	0.251412	0.381998	-0.286636	-0.165686	0.405565	-0.12488	0.502817	-0.0494143	0.723511	-0.286636	0.502817	0.214525	-0.0441541	-0.298046	-0.0494143	0.53155
[truncated: 18 more columns]
