# Supplementary material for: Functional Characterization of AP2/ERF Transcription Factors during Flower Development and Anthocyanin Biosynthesis Related Candidate Genes in Lycoris
Source: Int J Mol Sci. 2023 Sep 23;24(19):14464. doi: 10.3390/ijms241914464 (PMC10572147; doi:10.3390/ijms241914464)
Supplement: Supplementary file 1 [file ijms-24-14464-s001.zip › Table S3.xlsx]

## Sheet: Table S3
Table S3. The Pearson’s correlation coefficients of LrAP2/ERFs with anthocyanin biosynthesis pathway in L. radiata.
Gene ID	LrAP2/ERF01	LrAP2/ERF02	LrAP2/ERF03	LrAP2/ERF04	LrAP2/ERF05	LrAP2/ERF06	LrAP2/ERF07	LrAP2/ERF09	LrAP2/ERF10	LrAP2/ERF11	LrAP2/ERF12	LrAP2/ERF13	LrAP2/ERF14	LrAP2/ERF15	LrAP2/ERF16	LrAP2/ERF17	LrAP2/ERF18	LrAP2/ERF19	LrAP2/ERF20	LrAP2/ERF21	LrAP2/ERF22	LrAP2/ERF23	LrAP2/ERF24	LrAP2/ERF25	LrAP2/ERF26	LrAP2/ERF27	LrAP2/ERF28	LrAP2/ERF29	LrAP2/ERF30	LrAP2/ERF31	LrAP2/ERF32	LrAP2/ERF33	LrAP2/ERF36	LrAP2/ERF37	LrAP2/ERF38	LrAP2/ERF39	LrAP2/ERF40	LrAP2/ERF41	LrAP2/ERF42	LrAP2/ERF44	LrAP2/ERF46	LrAP2/ERF48	LrAP2/ERF49	LrAP2/ERF51	LrAP2/ERF52	LrAP2/ERF53	LrAP2/ERF54	LrAP2/ERF55	LrAP2/ERF56
PAL-1	0.383283	0.762564	-0.308584	0.30701	0.104327	-0.467888	-0.876829	-0.141581	0.758733	-0.516325	0.499908	0.383283	-0.395258	-0.222031	0.943354	0.0736222	-0.530147	-0.377175	0.104327	0.790344	0.649058	-0.342491	-0.189674	-0.212714	-0.43248	0.623739	-0.281581	0.107192	0.139735	-0.467888	0.912376	0.752777	0.933334	-0.364873	0.661967	-0.876829	-0.38365	0.800684	0.880394	-0.158733	0.383283	0.0242827	-0.876829	-0.158733	0.504492	0.79973	-0.682783	0.383283	0.85897
PAL-2	-0.118623	-0.264695	0.312265	-0.460707	-0.237996	0.700686	-0.439933	-0.41342	0.343511	0.478706	-0.386365	-0.118623	-0.456579	-0.56531	0.0560318	-0.047692	-0.411116	0.376638	-0.237996	-0.0724826	-0.248987	-0.331352	-0.640055	-0.582532	-0.511754	-0.158225	-0.511541	-0.587646	0.211051	0.700686	-0.111519	0.617316	-0.0365779	-0.474645	-0.091252	-0.439933	-0.367238	0.174905	0.125858	-0.243778	-0.118623	-0.659544	-0.439933	-0.243778	-0.073474	-0.0209751	0.490302	-0.118623	0.241989
PAL-3	0.238876	-0.244081	0.466304	-0.419136	-0.639038	-0.133299	0.519137	-0.309025	-0.0505031	-0.282022	-0.244955	0.238876	0.173603	0.113222	-0.296589	0.0543316	0.586415	0.300614	-0.639038	0.0402124	0.371002	0.8282	-0.0119841	-0.0481876	0.882217	0.313421	0.182346	-0.102738	-0.456003	-0.133299	0.0748937	-0.272998	-0.263186	0.921097	0.0683381	0.519137	0.839696	-0.507803	-0.494264	0.794163	0.238876	0.723495	0.519137	0.794163	-0.06931	-0.349938	-0.00150922	0.238876	-0.359791
PAL-4	0.438968	0.292509	-0.369963	0.322242	0.368135	-0.183425	-0.79809	-0.284169	0.723081	0.127707	0.226757	0.438968	0.166088	-0.416501	0.626469	0.612993	-0.799439	-0.151954	0.368135	0.483121	0.0462544	-0.635984	-0.265439	0.182735	-0.425351	0.203937	0.291448	0.424064	0.797601	-0.183425	0.447638	0.657113	0.760963	-0.624165	0.334299	-0.79809	-0.500312	0.40488	0.825827	-0.543907	0.438968	-0.586147	-0.79809	-0.543907	0.426086	0.759191	-0.496146	0.438968	0.511681
PAL-5	-0.27692	-0.387883	0.463517	-0.590424	-0.35924	0.803206	-0.168861	-0.327541	0.0924851	0.471552	-0.472261	-0.27692	-0.51701	-0.42978	-0.177203	-0.25493	-0.13898	0.458084	-0.35924	-0.256964	-0.285032	-0.128747	-0.567263	-0.659228	-0.387314	-0.238508	-0.619616	-0.746357	-0.0438908	0.803206	-0.283654	0.404067	-0.313334	-0.276798	-0.210954	-0.168861	-0.210038	0.023921	-0.161332	-0.0748458	-0.27692	-0.490327	-0.168861	-0.0748458	-0.218873	-0.286626	0.691522	-0.27692	0.0646349
PAL-6	0.077799	0.300901	-0.127664	0.0119074	0.0603518	0.197952	-0.868	-0.192483	0.583508	0.0691424	0.0881368	0.077799	-0.559732	-0.444447	0.603324	-0.0391226	-0.711409	-0.127262	0.0603518	0.318425	0.0609952	-0.658397	-0.484629	-0.483188	-0.788007	0.10606	-0.504121	-0.31973	0.287984	0.197952	0.381462	0.803179	0.52018	-0.748214	0.235123	-0.868	-0.700293	0.669096	0.670426	-0.503978	0.077799	-0.564674	-0.868	-0.503978	0.187116	0.457777	-0.107718	0.077799	0.696744
PAL-7	-0.246954	0.802624	-0.584348	0.740241	0.434653	-0.670579	-0.148199	0.799966	-0.283546	-0.718716	0.693438	-0.246954	-0.418237	0.573619	0.487747	-0.563483	0.076805	-0.834672	0.434653	0.243841	0.338807	-0.261973	0.552906	0.0969402	-0.398493	0.112727	-0.35367	0.0948665	-0.498846	-0.670579	0.359176	-0.23631	0.323718	-0.210909	0.188565	-0.148199	-0.410315	0.659782	0.312566	-0.246569	-0.246954	0.469948	-0.148199	-0.246569	0.0242883	0.254087	-0.529338	-0.246954	0.462643
PAL-8	-0.0964556	0.00668419	0.220243	-0.329654	-0.221037	0.526532	-0.600088	-0.314236	0.412766	0.223349	-0.197872	-0.0964556	-0.669012	-0.484519	0.29613	-0.196021	-0.432416	0.176652	-0.221037	0.105703	-0.0326341	-0.388943	-0.586324	-0.679092	-0.635869	-0.00499041	-0.687798	-0.642481	0.0615859	0.526532	0.124527	0.703279	0.152522	-0.515801	0.0654747	-0.600088	-0.469055	0.418786	0.295875	-0.261558	-0.0964556	-0.50315	-0.600088	-0.261558	-0.0099087	0.119908	0.284616	-0.0964556	0.481522
CHS-1	-0.465084	-0.353598	0.138953	-0.450335	-0.258834	0.577664	0.114309	0.0764098	-0.268929	0.298182	-0.388633	-0.465084	-0.397993	-0.12167	-0.344587	-0.508974	-0.124974	0.121778	-0.258834	-0.450009	-0.441621	-0.0884664	-0.270936	-0.457677	-0.276025	-0.434901	-0.506718	-0.614902	-0.217637	0.577664	-0.469232	-0.0145571	-0.482698	-0.230063	-0.399594	0.114309	-0.178548	0.0748383	-0.365682	-0.0836277	-0.465084	-0.355136	0.114309	-0.0836277	-0.383026	-0.499221	0.670548	-0.465084	-0.169628
CHS-2	0.216133	0.52763	-0.0436807	0.0889674	0.00999135	-0.0392049	-0.910973	-0.280492	0.753524	-0.200489	0.259126	0.216133	-0.556154	-0.4076	0.822595	0.0502788	-0.562842	-0.133144	0.00999135	0.660423	0.437737	-0.448708	-0.409591	-0.407591	-0.618084	0.450104	-0.498425	-0.231548	0.167082	-0.0392049	0.687556	0.871691	0.73878	-0.492632	0.52558	-0.910973	-0.511799	0.741815	0.772898	-0.28527	0.216133	-0.245075	-0.910973	-0.28527	0.413325	0.662419	-0.350607	0.216133	0.865892
CHS-3	0.291658	0.287732	0.132514	-0.239862	-0.289579	0.178268	-0.800867	-0.48889	0.779332	-0.115746	0.0110836	0.291658	-0.575624	-0.563101	0.622696	0.00832862	-0.50929	0.0840555	-0.289579	0.508227	0.395978	-0.245952	-0.584171	-0.632958	-0.450396	0.436251	-0.528474	-0.392886	0.12014	0.178268	0.590668	0.918872	0.560027	-0.343296	0.452891	-0.800867	-0.28283	0.562013	0.58507	-0.0529277	0.291658	-0.271513	-0.800867	-0.0529277	0.311983	0.455133	-0.130409	0.291658	0.679182
CHS-4	0.586869	-0.18255	0.111855	-0.157492	-0.306097	-0.18387	-0.17869	-0.604647	0.572405	0.0371439	-0.18202	0.586869	0.452917	-0.466513	0.152581	0.726659	-0.255187	0.213237	-0.306097	0.316229	0.167395	0.109212	-0.441857	0.133136	0.464465	0.320544	0.52668	0.279536	0.377719	-0.18387	0.310037	0.286857	0.311291	0.241186	0.211169	-0.17869	0.364495	-0.25297	0.192515	0.11914	0.586869	-0.040395	-0.17869	0.11914	0.246993	0.244188	-0.33629	0.586869	-0.024841
CHS-5	0.334929	0.654052	-0.564321	0.554567	0.443527	-0.519907	-0.77801	0.0348572	0.585028	-0.277204	0.523564	0.334929	-0.0600036	-0.186962	0.783712	0.233251	-0.633766	-0.463513	0.443527	0.510039	0.319505	-0.584133	-0.0705089	0.0817092	-0.494479	0.324587	0.0556171	0.456305	0.449217	-0.519907	0.692038	0.551947	0.856984	-0.602039	0.416611	-0.77801	-0.525844	0.637888	0.90215	-0.434467	0.334929	-0.231545	-0.77801	-0.434467	0.389533	0.757707	-0.6919	0.334929	0.593734
CHS-6	0.304441	-0.0366978	-0.257022	0.335109	0.516358	-0.245902	-0.0747094	-0.193889	0.236327	0.308256	0.177563	0.304441	0.816704	-0.142807	0.0552517	0.789049	-0.24342	0.105342	0.516358	0.176958	-0.143215	-0.182093	0.144214	0.749716	0.148063	0.0564704	0.830714	0.86665	0.818768	-0.245902	0.0129351	0.00800682	0.314174	-0.105767	0.122527	-0.0747094	0.0773379	-0.2551	0.284116	-0.241109	0.304441	-0.349024	-0.0747094	-0.241109	0.320803	0.47202	-0.309308	0.304441	-0.150397
CHS-7	0.0545805	0.92191	-0.591556	0.725945	0.454733	-0.658364	-0.691245	0.369784	0.33191	-0.609052	0.682238	0.0545805	-0.404538	0.141996	0.905474	-0.148098	-0.376844	-0.727537	0.454733	0.641683	0.475092	-0.498575	0.213043	0.0659521	-0.579458	0.340321	-0.295892	0.205609	-0.0394293	-0.658364	0.707918	0.338285	0.810464	-0.480674	0.444834	-0.691245	-0.580472	0.874526	0.789323	-0.392039	0.0545805	0.135963	-0.691245	-0.392039	0.302892	0.717082	-0.749605	0.0545805	0.811768
CHS-8	-0.340656	0.204423	-0.570306	0.588377	0.644954	-0.368843	0.302877	0.7978	-0.653125	-0.122647	0.359008	-0.340656	0.285021	0.618658	-0.15836	-0.225776	0.0740486	-0.587309	0.644954	-0.270679	-0.325759	-0.250197	0.684787	0.560093	-0.144068	-0.385403	0.259744	0.418962	-0.0442544	-0.368843	-0.308197	-0.69751	-0.136531	-0.184673	-0.251942	0.302877	-0.28493	0.0845183	-0.102314	-0.378841	-0.340656	0.0943523	0.302877	-0.378841	-0.0870917	-0.0768916	-0.20652	-0.340656	-0.175353
CHS-9	0.128001	0.869682	-0.633971	0.773309	0.600461	-0.721808	-0.678388	0.302552	0.377558	-0.485905	0.723212	0.128001	-0.119964	0.117064	0.874733	0.0998098	-0.443166	-0.661569	0.600461	0.68416	0.415313	-0.529709	0.259022	0.3127	-0.499346	0.357579	-0.0257889	0.455551	0.208333	-0.721808	0.676922	0.312729	0.863518	-0.480407	0.482172	-0.678388	-0.550849	0.762527	0.83174	-0.455987	0.128001	0.0398343	-0.678388	-0.455987	0.430409	0.828688	-0.817287	0.128001	0.73992
CHS-10	-0.630813	-0.358455	0.272916	-0.306977	-0.0989384	0.70919	0.1711	0.185328	-0.435279	0.418195	-0.368166	-0.630813	-0.503217	-0.026497	-0.394977	-0.544938	0.122073	0.210079	-0.0989384	-0.551901	-0.504218	-0.149498	-0.19777	-0.449275	-0.435144	-0.557531	-0.64127	-0.680857	-0.291673	0.70919	-0.580778	-0.0886284	-0.590401	-0.291067	-0.493056	0.1711	-0.291633	-0.0082294	-0.409498	-0.182087	-0.630813	-0.348255	0.1711	-0.182087	-0.4676	-0.528533	0.794594	-0.630813	-0.125095
CHS-11	0.439682	0.571257	-0.190817	0.169749	0.0653035	-0.356979	-0.883058	-0.362637	0.819656	-0.309259	0.364035	0.439682	-0.214646	-0.502338	0.862842	0.331152	-0.514198	-0.13338	0.0653035	0.829125	0.568496	-0.309998	-0.26539	-0.148875	-0.353238	0.642805	-0.173745	0.08438	0.257666	-0.356979	0.772831	0.802846	0.845831	-0.305986	0.709879	-0.883058	-0.297033	0.570293	0.813465	-0.175414	0.439682	-0.087597	-0.883058	-0.175414	0.675117	0.834308	-0.616794	0.439682	0.827643
CHS-12	0.210081	-0.205201	0.495607	-0.40927	-0.607488	-0.120569	0.555043	-0.281284	-0.0679207	-0.301283	-0.223632	0.210081	0.155659	0.188479	-0.299246	0.0197347	0.648444	0.321457	-0.607488	0.063866	0.415062	0.901538	0.073721	-0.0192113	0.894818	0.333437	0.159837	-0.088071	-0.47662	-0.120569	0.0798036	-0.284607	-0.263013	0.957785	0.0874375	0.555043	0.848444	-0.481396	-0.509603	0.873109	0.210081	0.772067	0.555043	0.873109	-0.0471905	-0.348483	0.0330108	0.210081	-0.360062
C4H-1	0.378599	0.87813	-0.49172	0.541541	0.341273	-0.68667	-0.771515	0.0980642	0.595163	-0.608015	0.727036	0.378599	-0.224538	0.0361473	0.931007	0.0960179	-0.472771	-0.54513	0.341273	0.805635	0.652576	-0.378727	0.100248	0.0575168	-0.399976	0.635723	-0.0845999	0.348637	0.161541	-0.68667	0.889113	0.541416	0.953306	-0.341162	0.712945	-0.771515	-0.426088	0.803207	0.897986	-0.24735	0.378599	0.127254	-0.771515	-0.24735	0.589246	0.872261	-0.833099	0.378599	0.836137
C4H-2	0.360773	0.856837	-0.630082	0.63748	0.424482	-0.668625	-0.802862	0.165328	0.555723	-0.541444	0.678993	0.360773	-0.192073	-0.0162724	0.921379	0.100821	-0.577054	-0.645994	0.424482	0.695082	0.504199	-0.525801	0.125084	0.0821724	-0.492514	0.4745	-0.0328704	0.379521	0.245854	-0.668625	0.804151	0.503742	0.938379	-0.49685	0.583986	-0.802862	-0.534399	0.80363	0.934188	-0.386423	0.360773	-0.00397777	-0.802862	-0.386423	0.492116	0.840155	-0.862336	0.360773	0.774811
4CL-1	0.14811	-0.279195	0.445083	-0.423438	-0.644733	-0.0620151	0.52004	-0.276378	-0.129658	-0.253338	-0.286174	0.14811	0.115747	0.00221491	-0.334284	-0.0343257	0.607144	0.283811	-0.644733	-0.0515522	0.285211	0.765304	-0.0625856	-0.13836	0.784563	0.229877	0.0706241	-0.192253	-0.526647	-0.0620151	-0.00641788	-0.306796	-0.342957	0.859816	0.00357597	0.52004	0.837816	-0.523063	-0.545612	0.722491	0.14811	0.664108	0.52004	0.722491	-0.124658	-0.40614	0.0556647	0.14811	-0.376158
4CL-2	-0.175837	0.659668	-0.215226	0.399946	0.330729	-0.136803	-0.596669	0.207363	0.293744	-0.266552	0.477708	-0.175837	-0.616702	0.0256793	0.687134	-0.261258	-0.249298	-0.28054	0.330729	0.502897	0.340968	-0.398968	0.0497051	-0.150679	-0.702309	0.254397	-0.582763	-0.119379	-0.0575363	-0.136803	0.440844	0.495612	0.526426	-0.493281	0.372321	-0.596669	-0.570101	0.78541	0.578066	-0.300549	-0.175837	-0.106746	-0.596669	-0.300549	0.214102	0.55278	-0.161134	-0.175837	0.756848
4CL-3	-0.0965247	-0.0326501	0.19088	-0.116932	-0.36889	-0.261628	0.657402	0.199682	-0.47477	-0.473998	-0.0496369	-0.0965247	0.0153365	0.460222	-0.327798	-0.354326	0.749564	-0.0628769	-0.36889	-0.116205	0.262724	0.734075	0.345682	0.032279	0.661768	0.0953193	-0.0176991	-0.095561	-0.735913	-0.261628	-0.0669818	-0.62327	-0.371635	0.807278	-0.0846523	0.657402	0.685948	-0.326024	-0.59624	0.660408	-0.0965247	0.860499	0.657402	0.660408	-0.237809	-0.438878	-0.015019	-0.0965247	-0.339919
4CL-4	-0.175412	-0.796007	0.57977	-0.780116	-0.486991	0.887786	0.277068	-0.439589	-0.0942667	0.670246	-0.725683	-0.175412	-0.0479486	-0.421527	-0.626169	-0.0223314	0.067163	0.705083	-0.486991	-0.52772	-0.488175	0.197956	-0.489221	-0.425139	0.102705	-0.366936	-0.169329	-0.551618	0.0496506	0.887786	-0.606202	0.0820189	-0.650424	0.0738669	-0.402686	0.277068	0.207155	-0.483829	-0.539996	0.175009	-0.175412	-0.448857	0.277068	0.175009	-0.303047	-0.581665	0.876038	-0.175412	-0.451163
4CL-5	-0.00806527	-0.213419	-0.398851	0.395132	0.639372	-0.0792349	0.0371277	0.171754	-0.156435	0.494932	0.0450224	-0.00806527	0.730283	-0.0191565	-0.184005	0.549642	-0.334728	-0.0997051	0.639372	-0.252373	-0.594198	-0.491526	0.151488	0.681953	-0.108987	-0.425992	0.70795	0.652473	0.714242	-0.0792349	-0.36744	-0.269682	-0.00549368	-0.411245	-0.277927	0.0371277	-0.29453	-0.245682	0.114284	-0.61484	-0.00806527	-0.548791	0.0371277	-0.61484	0.0619107	0.132859	-0.109853	-0.00806527	-0.27835
4CL-6	-0.461555	0.440593	-0.523388	0.707232	0.547433	-0.406609	0.2565	0.975658	-0.680008	-0.385752	0.503939	-0.461555	-0.181286	0.738611	0.0232894	-0.563399	0.243698	-0.69638	0.547433	-0.194783	-0.0844611	-0.226304	0.679747	0.283521	-0.308002	-0.276836	-0.15877	0.146925	-0.439852	-0.406609	-0.134855	-0.606245	-0.107707	-0.188234	-0.174633	0.2565	-0.370868	0.341309	-0.0480317	-0.311204	-0.461555	0.307142	0.2565	-0.311204	-0.207465	-0.096561	-0.148575	-0.461555	0.0495722
4CL-7	-0.205993	0.232652	0.195239	-0.0525365	-0.16872	0.14575	0.0660962	0.151427	-0.102237	-0.284573	-0.00082052	-0.205993	-0.589175	0.287014	0.108601	-0.454384	0.376583	0.0276249	-0.16872	0.178762	0.29514	0.361642	0.296869	-0.246877	-0.06361	0.106456	-0.548065	-0.437778	-0.525654	0.14575	0.0257991	0.0461789	-0.0772861	0.19674	0.0965445	0.0660962	0.00441953	0.267715	-0.141376	0.402731	-0.205993	0.363559	0.0660962	0.402731	-0.0794125	-0.0724818	0.246239	-0.205993	0.267124
4CL-8	0.642958	0.346391	0.124638	-0.187173	-0.502327	-0.330704	-0.4376	-0.547948	0.741646	-0.54893	0.072716	0.642958	-0.190901	-0.336272	0.552303	0.19846	-0.092815	0.0263267	-0.502327	0.661461	0.770418	0.345499	-0.313034	-0.34591	0.293387	0.747134	-0.0803944	-0.0185037	-0.099229	-0.330704	0.80881	0.578751	0.605213	0.343188	0.596877	-0.4376	0.376626	0.230973	0.396327	0.513004	0.642958	0.405157	-0.4376	0.513004	0.376248	0.422669	-0.514345	0.642958	0.428259
4CL-9	-0.309918	-0.623767	0.593642	-0.728756	-0.488956	0.880455	0.113901	-0.369144	-0.0745762	0.56141	-0.655645	-0.309918	-0.362868	-0.390637	-0.44689	-0.222871	0.0629977	0.601284	-0.488956	-0.438581	-0.396087	0.087592	-0.545907	-0.597496	-0.122596	-0.349366	-0.490309	-0.7545	-0.11758	0.880455	-0.487692	0.188097	-0.562445	-0.0476595	-0.374918	0.113901	0.0332355	-0.265573	-0.443588	0.0948268	-0.309918	-0.39804	0.113901	0.0948268	-0.359504	-0.52282	0.844276	-0.309918	-0.210076
4CL-11	0.241148	-0.0944709	-0.44815	0.419659	0.574948	-0.23738	-0.0757659	0.0463641	0.0747242	0.341582	0.131944	0.241148	0.780363	-0.0665754	-0.0207163	0.680733	-0.413694	-0.123994	0.574948	-0.0547752	-0.381352	-0.418261	0.125714	0.692183	0.00370633	-0.197493	0.827775	0.794789	0.793387	-0.23738	-0.123548	-0.116174	0.214692	-0.333016	-0.0842881	-0.0757659	-0.191578	-0.178715	0.280216	-0.494228	0.241148	-0.471469	-0.0757659	-0.494228	0.195437	0.307235	-0.300396	0.241148	-0.194752
4CL-12	0.0456223	-0.0787562	-0.405363	0.372356	0.646089	-0.0369177	-0.330585	-0.0102968	0.158864	0.519787	0.089291	0.0456223	0.532588	-0.243083	0.0975549	0.605715	-0.579661	-0.058424	0.646089	-0.0355252	-0.496022	-0.675543	-0.0875008	0.525423	-0.364375	-0.300328	0.51822	0.595033	0.867004	-0.0369177	-0.149277	0.118193	0.265902	-0.6498	-0.127244	-0.330585	-0.472985	-0.00487363	0.398748	-0.727715	0.0456223	-0.751232	-0.330585	-0.727715	0.160955	0.399541	-0.147738	0.0456223	0.0274326
4CL-13	0.224783	-0.327015	0.484594	-0.442008	-0.59303	-0.082136	0.4559	-0.436452	0.0274178	-0.135453	-0.308223	0.224783	0.299867	-0.0673212	-0.299366	0.207356	0.491662	0.381008	-0.59303	0.0357619	0.268128	0.738677	-0.170596	0.0105814	0.849515	0.267529	0.248355	-0.0180289	-0.284351	-0.082136	0.0529057	-0.21948	-0.224923	0.844646	0.0279547	0.4559	0.861646	-0.568041	-0.46331	0.693023	0.224783	0.554808	0.4559	0.693023	-0.0520651	-0.288015	0.00904058	0.224783	-0.388076
F3H	-0.372885	-0.185036	0.423428	-0.286498	-0.15648	0.674344	-0.226784	-0.158884	0.0362472	0.329192	-0.373848	-0.372885	-0.543265	-0.191756	0.00733657	-0.19997	-0.0601611	0.227846	-0.15648	-0.0740652	-0.262915	-0.203048	-0.440472	-0.430952	-0.475081	-0.286283	-0.643542	-0.650215	-0.0990434	0.674344	-0.190398	0.259462	-0.129322	-0.284521	-0.231457	-0.226784	-0.298968	0.194018	-0.0881743	-0.211001	-0.372885	-0.353364	-0.226784	-0.211001	-0.222245	-0.114324	0.472285	-0.372885	0.300066
CHI-1	0.38045	0.697361	-0.464032	0.501385	0.423264	-0.500866	-0.875265	-0.0972583	0.722155	-0.275012	0.575268	0.38045	-0.0721572	-0.228268	0.896567	0.348135	-0.662493	-0.369846	0.423264	0.747271	0.428106	-0.562512	-0.0717148	0.136976	-0.494112	0.491732	0.0462501	0.413617	0.49576	-0.500866	0.755942	0.676365	0.953766	-0.536639	0.605635	-0.875265	-0.508735	0.685979	0.960384	-0.434876	0.38045	-0.233021	-0.875265	-0.434876	0.561995	0.929579	-0.72905	0.38045	0.76619
CHI-2	0.42511	0.247341	-0.4026	0.419302	0.511299	-0.322932	-0.575298	-0.212597	0.572619	0.158232	0.316816	0.42511	0.466406	-0.274157	0.487898	0.741776	-0.64463	-0.118673	0.511299	0.451263	0.0182291	-0.527324	-0.0571937	0.491694	-0.22393	0.206509	0.567393	0.684441	0.860171	-0.322932	0.346516	0.421557	0.679022	-0.459347	0.329264	-0.575298	-0.342996	0.202821	0.710849	-0.49996	0.42511	-0.485627	-0.575298	-0.49996	0.471662	0.750564	-0.537747	0.42511	0.322686
CHI-3	-0.431895	-0.39469	0.632596	-0.596012	-0.431065	0.76089	0.187052	-0.207399	-0.180797	0.3271	-0.484994	-0.431895	-0.529925	-0.16293	-0.350465	-0.416824	0.331731	0.525182	-0.431065	-0.300013	-0.171817	0.255588	-0.317053	-0.568332	-0.122144	-0.224733	-0.67779	-0.783314	-0.385349	0.76089	-0.381815	0.0970201	-0.526722	0.102819	-0.264947	0.187052	0.0907168	-0.144513	-0.475272	0.25809	-0.431895	-0.0973601	0.187052	0.25809	-0.327052	-0.474606	0.799187	-0.431895	-0.0841522
F3'5'H-1	-0.208819	-0.255225	-0.0487195	-0.496735	-0.318802	0.358495	-0.155353	-0.0551608	-0.0334776	0.191363	-0.304271	-0.208819	-0.424768	-0.308751	-0.162796	-0.407564	-0.317295	0.101257	-0.318802	-0.309261	-0.29376	-0.147497	-0.398631	-0.585206	-0.296054	-0.244389	-0.483279	-0.524708	-0.12218	0.358495	-0.247844	0.253116	-0.267152	-0.340052	-0.208857	-0.155353	-0.245752	0.141145	-0.129929	-0.0701493	-0.208819	-0.376328	-0.155353	-0.0701493	-0.211828	-0.293279	0.496533	-0.208819	0.019547
F3'5'H-2	-0.401017	-0.553512	0.503403	-0.606744	-0.331827	0.874944	0.0590999	-0.250782	-0.129823	0.590987	-0.576933	-0.401017	-0.400079	-0.336839	-0.404006	-0.268868	0.0148369	0.517474	-0.331827	-0.458586	-0.461625	-0.0566631	-0.484706	-0.552477	-0.285675	-0.424469	-0.533888	-0.724275	-0.0766778	0.874944	-0.515641	0.17472	-0.534128	-0.199224	-0.404709	0.0590999	-0.125813	-0.177093	-0.377732	-0.0551279	-0.401017	-0.479323	0.0590999	-0.0551279	-0.370133	-0.471866	0.835111	-0.401017	-0.148651
F3'5'H-3	-0.40198	-0.406299	0.27067	-0.56697	-0.300664	0.575277	0.0389587	-0.149538	-0.172064	0.402324	-0.43502	-0.40198	-0.410674	-0.227282	-0.325205	-0.354639	0.00874308	0.388261	-0.300664	-0.348344	-0.357091	0.0142098	-0.310975	-0.464729	-0.2161	-0.338617	-0.521284	-0.619224	-0.159654	0.575277	-0.456761	0.1362	-0.466763	-0.165989	-0.318989	0.0389587	-0.118126	-0.110958	-0.355454	0.0309018	-0.40198	-0.320184	0.0389587	0.0309018	-0.334348	-0.381605	0.714262	-0.40198	-0.0717595
F3'H-1	0.655654	0.364559	-0.138952	0.0568125	0.0249005	-0.183062	-0.853167	-0.492402	0.932678	-0.0990863	0.294599	0.655654	-0.0241547	-0.507891	0.713969	0.503817	-0.721931	-0.0223073	0.0249005	0.666529	0.432816	-0.403871	-0.406359	-0.154211	-0.290373	0.607295	0.118923	0.203539	0.580669	-0.183062	0.729454	0.884607	0.822887	-0.366139	0.66435	-0.853167	-0.298057	0.456736	0.859211	-0.250204	0.655654	-0.347819	-0.853167	-0.250204	0.630483	0.773216	-0.538199	0.655654	0.622945
F3'H-2	0.583	-0.283081	0.213764	-0.532507	-0.491666	0.299727	-0.523777	-0.797459	0.755933	0.259986	-0.383586	0.583	-0.0216585	-0.823065	0.173167	0.474211	-0.51134	0.430371	-0.491666	0.183801	0.0761689	-0.0752536	-0.739795	-0.486245	0.0226711	0.261496	0.044923	-0.203518	0.422107	0.299727	0.249831	0.775373	0.250607	-0.145507	0.227919	-0.523777	0.0303404	-0.0735436	0.314148	0.0613245	0.583	-0.441366	-0.523777	0.0613245	0.259233	0.191568	0.0274981	0.583	0.175598
F3'H-3	-0.0845609	0.0427644	-0.556261	0.6716	0.76955	-0.301597	0.142869	0.473635	-0.320519	0.214705	0.275173	-0.0845609	0.637229	0.27722	-0.0912766	0.353278	-0.158075	-0.344381	0.76955	-0.180598	-0.442428	-0.42144	0.478175	0.798326	-0.108259	-0.373246	0.660787	0.730776	0.487825	-0.301597	-0.296125	-0.453087	0.0352168	-0.329133	-0.221397	0.142869	-0.289318	-0.0978366	0.119006	-0.554273	-0.0845609	-0.285091	0.142869	-0.554273	0.0288232	0.165282	-0.240019	-0.0845609	-0.224317
F3'H-4	0.185829	0.928331	-0.515195	0.582842	0.341706	-0.609019	-0.785339	0.242288	0.472367	-0.633409	0.714317	0.185829	-0.467728	0.0615189	0.946715	-0.151245	-0.443533	-0.643179	0.341706	0.712489	0.594363	-0.476624	0.110866	-0.0921871	-0.588364	0.50724	-0.341906	0.135312	-0.0170162	-0.609019	0.820388	0.511866	0.867259	-0.46	0.604805	-0.785339	-0.562721	0.913303	0.861911	-0.334452	0.185829	0.117294	-0.785339	-0.334452	0.429527	0.770883	-0.747623	0.185829	0.884824
F3'H-5	-0.146582	-0.760153	0.301796	-0.462818	-0.0708328	0.836046	0.113078	-0.313629	-0.0763174	0.881391	-0.60287	-0.146582	0.190919	-0.421278	-0.552434	0.231001	-0.216459	0.559122	-0.0708328	-0.575009	-0.741694	-0.211822	-0.419803	-0.135593	-0.148508	-0.552414	0.105966	-0.223523	0.471422	0.836046	-0.674163	0.0849674	-0.497268	-0.307438	-0.478177	0.113078	-0.122813	-0.430717	-0.292536	-0.261498	-0.146582	-0.804435	0.113078	-0.261498	-0.245542	-0.373237	0.736114	-0.146582	-0.415936
F3'H-6	0.133659	0.964048	-0.517608	0.660439	0.386269	-0.688352	-0.672779	0.338066	0.365395	-0.698965	0.777022	0.133659	-0.432979	0.19587	0.918474	-0.173711	-0.309792	-0.676191	0.386269	0.729986	0.6274	-0.398795	0.24257	0.0180979	-0.51463	0.51787	-0.309933	0.182076	-0.107938	-0.688352	0.792889	0.378525	0.826399	-0.354961	0.608753	-0.672779	-0.501179	0.88136	0.790378	-0.291376	0.133659	0.247552	-0.672779	-0.291376	0.421594	0.756053	-0.765874	0.133659	0.862219
F3'H-7	-0.207401	-0.639648	0.326724	-0.630392	-0.354946	0.794525	-0.0159896	-0.343162	0.000563305	0.656929	-0.656771	-0.207401	-0.213573	-0.498814	-0.407987	-0.0819193	-0.223049	0.490301	-0.354946	-0.498659	-0.551734	-0.12909	-0.557447	-0.505081	-0.203002	-0.46197	-0.29423	-0.575491	0.141428	0.794525	-0.51724	0.248936	-0.474051	-0.294814	-0.439609	-0.0159896	-0.149911	-0.235699	-0.28578	-0.0970978	-0.207401	-0.630501	-0.0159896	-0.0970978	-0.342493	-0.451997	0.75122	-0.207401	-0.246932
F3'H-8	0.196547	0.663026	-0.257107	0.231718	0.0838961	-0.215853	-0.935043	-0.106331	0.685128	-0.345374	0.369528	0.196547	-0.606181	-0.291597	0.894621	-0.0688814	-0.611821	-0.349502	0.0838961	0.653951	0.451118	-0.520438	-0.289447	-0.378293	-0.669299	0.418299	-0.505101	-0.171579	0.105409	-0.215853	0.730318	0.802789	0.794645	-0.567189	0.505399	-0.935043	-0.595332	0.855198	0.831796	-0.340395	0.196547	-0.181925	-0.935043	-0.340395	0.348274	0.683629	-0.474808	0.196547	0.900051
F3'H-9	-0.159938	0.825608	-0.553194	0.746959	0.411605	-0.788473	-0.132046	0.691271	-0.188519	-0.772362	0.678155	-0.159938	-0.277536	0.574181	0.537162	-0.406809	0.110488	-0.808472	0.411605	0.377695	0.43362	-0.132983	0.570413	0.240713	-0.218272	0.203395	-0.213188	0.230908	-0.444816	-0.788473	0.453206	-0.249436	0.422775	-0.0657412	0.238729	-0.132046	-0.262124	0.605032	0.321338	-0.121582	-0.159938	0.581323	-0.132046	-0.121582	0.0829449	0.331318	-0.654357	-0.159938	0.447895
F3'H-10	-0.128724	-0.807406	0.713174	-0.849698	-0.678719	0.719316	0.401234	-0.566535	-0.106323	0.505324	-0.75924	-0.128724	0.0120468	-0.453839	-0.643714	0.0122442	0.326464	0.763728	-0.678719	-0.451952	-0.310287	0.452153	-0.550853	-0.423996	0.386451	-0.224479	-0.154838	-0.540838	-0.156601	0.719316	-0.496825	-0.02833	-0.667491	0.401353	-0.360655	0.401234	0.556632	-0.672891	-0.67708	0.410544	-0.128724	-0.128815	0.401234	0.410544	-0.336187	-0.617488	0.750799	-0.128724	-0.506276
F3'H-11	-0.0735789	-0.733195	0.789599	-0.874532	-0.787722	0.621046	0.469938	-0.564495	-0.0727337	0.358598	-0.756041	-0.0735789	-0.0606503	-0.254136	-0.60322	-0.0270703	0.434612	0.757624	-0.787722	-0.34914	-0.129909	0.65542	-0.439803	-0.407017	0.56502	-0.12517	-0.1521	-0.573681	-0.28027	0.621046	-0.392277	-0.0393505	-0.635433	0.581207	-0.319435	0.469938	0.618074	-0.644687	-0.704119	0.637901	-0.0735789	0.113524	0.469938	0.637901	-0.368644	-0.654543	0.707451	-0.0735789	-0.49125
ANS	0.00328202	0.916915	-0.673154	0.855673	0.674017	-0.748882	-0.528817	0.510722	0.168524	-0.558066	0.813421	0.00328202	-0.161467	0.27837	0.788589	-0.0829961	-0.287471	-0.736377	0.674017	0.579784	0.412424	-0.484577	0.432027	0.325211	-0.518618	0.312501	-0.0915877	0.443026	0.044762	-0.748882	0.598543	0.141672	0.741491	-0.4407	0.447294	-0.528817	-0.551242	0.766996	0.731304	-0.431995	0.00328202	0.151622	-0.528817	-0.431995	0.391477	0.724412	-0.761487	0.00328202	0.670807
DFR-1	-0.173179	0.42606	-0.15805	0.451875	0.4311	-0.280457	-0.466895	0.00804423	0.264517	-0.0247375	0.310048	-0.173179	-0.10313	0.0568799	0.582013	0.250665	-0.232947	-0.198337	0.4311	0.571664	0.104455	-0.410887	0.0553683	0.40556	-0.376292	0.0869781	-0.0756794	0.17948	0.250899	-0.280457	0.262906	0.226017	0.520969	-0.317337	0.177777	-0.466895	-0.378873	0.387074	0.440816	-0.442302	-0.173179	-0.11929	-0.466895	-0.442302	0.102104	0.625175	-0.37082	-0.173179	0.590671
DFR-2	0.0390811	0.397576	-0.149013	0.333026	0.294847	-0.297081	-0.60166	-0.207247	0.50166	-0.0309804	0.244768	0.0390811	-0.0464002	-0.167776	0.665488	0.412162	-0.381004	-0.123593	0.294847	0.687917	0.192425	-0.378634	-0.094025	0.329133	-0.295117	0.22652	0.000224099	0.191405	0.359736	-0.297081	0.386679	0.421488	0.637313	-0.298529	0.299706	-0.60166	-0.318082	0.382325	0.546519	-0.370389	0.0390811	-0.171006	-0.60166	-0.370389	0.24442	0.711652	-0.448134	0.0390811	0.631358
DFR-3	-0.0324974	-0.555362	0.690101	-0.765831	-0.816421	0.406889	0.566115	-0.407939	-0.15813	0.0483876	-0.592325	-0.0324974	-0.0775324	-0.120994	-0.548548	-0.17528	0.574374	0.567182	-0.816421	-0.266824	0.0655487	0.801936	-0.259156	-0.39455	0.675709	0.02771	-0.168434	-0.525145	-0.517836	0.406889	-0.266738	-0.184965	-0.598091	0.767145	-0.190417	0.566115	0.773807	-0.564571	-0.733598	0.779518	-0.0324974	0.401154	0.566115	0.779518	-0.293376	-0.649326	0.534955	-0.0324974	-0.478933
DFR-4	0.285024	0.858292	-0.34027	0.508983	0.144296	-0.806461	-0.389619	0.1417	0.36521	-0.834981	0.626074	0.285024	-0.194195	0.19367	0.771745	-0.0447046	0.0157491	-0.514227	0.144296	0.772708	0.810566	0.0959342	0.31016	0.125484	0.00361591	0.663533	-0.103589	0.308227	-0.241462	-0.806461	0.837031	0.203333	0.748983	0.141437	0.626041	-0.389619	0.0260219	0.571941	0.547519	0.194114	0.285024	0.616549	-0.389619	0.194114	0.4267	0.634094	-0.823704	0.285024	0.606794
DFR-5	0.125379	0.0749427	0.135093	-0.0861777	-0.363534	-0.335192	0.487834	0.0723962	-0.221864	-0.538079	-0.0276822	0.125379	0.0918622	0.356359	-0.131304	-0.133361	0.593031	-0.072598	-0.363534	0.169638	0.409009	0.769623	0.440081	0.134926	0.716148	0.275046	0.113346	-0.0285943	-0.596014	-0.335192	0.0682668	-0.447469	-0.162227	0.824467	0.130132	0.487834	0.645829	-0.217089	-0.416031	0.716204	0.125379	0.85666	0.487834	0.716204	0.0410211	-0.225223	-0.19268	0.125379	-0.181995
DFR-6	0.162422	0.977008	-0.507195	0.622805	0.328577	-0.721288	-0.62699	0.319658	0.355422	-0.769646	0.760792	0.162422	-0.424878	0.20734	0.899058	-0.214857	-0.245434	-0.680686	0.328577	0.728739	0.686022	-0.293339	0.277276	-0.00564976	-0.431136	0.55451	-0.308879	0.189438	-0.166257	-0.721288	0.82309	0.344408	0.81861	-0.262455	0.619315	-0.62699	-0.39738	0.851601	0.747972	-0.171508	0.162422	0.344706	-0.62699	-0.171508	0.415054	0.722704	-0.795984	0.162422	0.815886
DFR-7	0.329489	0.882821	-0.35488	0.453938	0.154005	-0.685757	-0.698307	0.0184155	0.597432	-0.715002	0.608909	0.329489	-0.342744	0.0181879	0.938153	0.00537421	-0.295221	-0.497669	0.154005	0.846494	0.767652	-0.167198	0.0724977	-0.0336024	-0.261185	0.666114	-0.222712	0.20725	-0.0482011	-0.685757	0.93274	0.514888	0.911654	-0.151834	0.672636	-0.698307	-0.242553	0.761448	0.778761	-0.0173678	0.329489	0.332679	-0.698307	-0.0173678	0.473145	0.77726	-0.812173	0.329489	0.813425
DFR-8	0.270488	-0.0414073	0.124989	-0.00651692	-0.219565	-0.433662	0.581408	-0.00870171	-0.169609	-0.368561	0.048842	0.270488	0.466543	0.381118	-0.239388	0.170675	0.555707	0.0449489	-0.219565	0.0809844	0.347378	0.725472	0.376253	0.3831	0.874713	0.29149	0.515593	0.363815	-0.268493	-0.433662	0.0887631	-0.483846	-0.121706	0.837894	0.109697	0.581408	0.740764	-0.438732	-0.35746	0.655024	0.270488	0.743876	0.581408	0.655024	0.0531014	-0.169777	-0.237545	0.270488	-0.403657
UDP-1	-0.0761879	-0.23911	-0.146078	0.197799	0.593724	-0.0817183	0.129572	-0.049428	-0.0608447	0.543131	0.051244	-0.0761879	0.870421	-0.154423	-0.223644	0.645106	-0.15821	0.214341	0.593724	-0.0931245	-0.398479	-0.190818	0.113567	0.759888	0.0893971	-0.197	0.683215	0.71773	0.707362	-0.0817183	-0.296853	-0.202335	-0.0188999	-0.1643	-0.104567	0.129572	-0.0416194	-0.35924	0.0196985	-0.318038	-0.0761879	-0.420955	0.129572	-0.318038	0.312733	0.172352	0.000996042	-0.0761879	-0.34709
UDP-2	-0.126739	-0.243713	-0.169716	0.240763	0.63268	-0.0688348	0.176927	-0.00615754	-0.128356	0.566518	0.0746361	-0.126739	0.854704	-0.095224	-0.262896	0.58492	-0.117932	0.202497	0.63268	-0.17051	-0.443188	-0.222231	0.147812	0.773145	0.0607724	-0.256758	0.68821	0.746552	0.716786	-0.0688348	-0.340719	-0.250578	-0.056926	-0.187043	-0.169462	0.176927	-0.0246987	-0.394145	-0.005598	-0.345578	-0.126739	-0.444673	0.176927	-0.345578	0.181767	0.146365	0.032081	-0.126739	-0.408213
UDP-3	-0.180865	-0.807672	0.696084	-0.644507	-0.465493	0.592721	0.66081	-0.380056	-0.360664	0.517339	-0.678049	-0.180865	0.224899	-0.143126	-0.788982	0.0865713	0.616667	0.751763	-0.465493	-0.534504	-0.34488	0.57325	-0.198609	-0.100871	0.549095	-0.313268	0.0758726	-0.316026	-0.169912	0.592721	-0.634968	-0.342552	-0.781796	0.553813	-0.447559	0.66081	0.619097	-0.884668	-0.807283	0.465249	-0.180865	0.0661052	0.66081	0.465249	-0.37786	-0.669106	0.703959	-0.180865	-0.663611
UFGT-1	0.281903	0.300277	0.203196	-0.0554693	-0.41227	-0.43276	0.20078	-0.136953	0.118037	-0.684212	0.123172	0.281903	-0.0758436	0.187012	0.177813	-0.0858482	0.545437	-0.0213313	-0.41227	0.429191	0.727573	0.748515	0.207034	-0.0429027	0.613502	0.578356	-0.0438121	0.0235147	-0.551291	-0.43276	0.475241	-0.0932801	0.171155	0.784866	0.382969	0.20078	0.687262	-0.0412086	-0.124172	0.787037	0.281903	0.890175	0.20078	0.787037	0.156833	0.0600339	-0.351043	0.281903	0.076679
UFGT-2	0.297236	0.65642	-0.599977	0.641945	0.392215	-0.78719	-0.557713	0.144317	0.428736	-0.462789	0.5391	0.297236	0.106601	-0.0263087	0.734075	0.289865	-0.446104	-0.582551	0.392215	0.576644	0.366635	-0.391003	0.0467473	0.317376	-0.192789	0.343406	0.201169	0.555072	0.240619	-0.78719	0.672787	0.249367	0.798034	-0.313797	0.382104	-0.557713	-0.302488	0.530739	0.720618	-0.326293	0.297236	0.0817156	-0.557713	-0.326293	0.367869	0.690622	-0.82994	0.297236	0.519179
UFGT-3	0.0907664	-0.732683	0.535426	-0.745104	-0.700976	0.4146	0.466833	-0.356552	-0.170682	0.298765	-0.571639	0.0907664	0.0611204	0.0554828	-0.640207	-0.00245432	0.209224	0.473395	-0.700976	-0.461053	-0.250795	0.384	-0.386336	-0.300918	0.557723	-0.180683	0.141285	-0.412144	-0.149051	0.4146	-0.387029	-0.177596	-0.594868	0.466433	-0.347304	0.466833	0.437015	-0.625751	-0.606904	0.33341	0.0907664	0.0652956	0.466833	0.33341	-0.458445	-0.642898	0.485538	0.0907664	-0.505072
UFGT-4	-0.17823	-0.376327	0.0907502	-0.107493	0.372915	0.478728	-0.271223	-0.330548	0.192553	0.845766	-0.218158	-0.17823	0.312639	-0.482858	-0.111525	0.48334	-0.450091	0.429251	0.372915	-0.158471	-0.56995	-0.521295	-0.399937	0.198291	-0.410646	-0.347075	0.168017	0.168044	0.799669	0.478728	-0.335154	0.308992	-0.00856543	-0.581616	-0.212105	-0.271223	-0.37191	-0.156351	0.157492	-0.557263	-0.17823	-0.910255	-0.271223	-0.557263	0.0612149	0.177767	0.357555	-0.17823	-0.0568642
UFGT-5	-0.0663039	-0.283119	-0.0711362	0.0954783	0.530721	-0.0254126	0.0971474	-0.171265	0.00250573	0.59568	0.00830476	-0.0663039	0.856116	-0.233951	-0.230905	0.659319	-0.169509	0.309256	0.530721	-0.0856789	-0.386994	-0.17535	0.0188585	0.700693	0.0963433	-0.167209	0.656205	0.685243	0.749644	-0.0254126	-0.279943	-0.125704	-0.01473	-0.15142	-0.0927545	0.0971474	0.012795	-0.402988	0.0158694	-0.285233	-0.0663039	-0.461235	0.0971474	-0.285233	0.29088	0.183175	0.0356817	-0.0663039	-0.355151
UFGT-6	-0.108896	-0.133102	0.120422	-0.303725	-0.335269	0.32489	0.183174	0.016359	-0.0599257	-0.0900434	-0.348564	-0.108896	-0.230355	0.0106226	-0.193843	-0.358934	0.0338526	0.00597857	-0.335269	-0.221488	-0.0703221	0.329503	-0.125884	-0.332231	0.10075	-0.160419	-0.276956	-0.263723	-0.250618	0.32489	-0.0874892	-0.0410162	-0.180925	0.11681	-0.233669	0.183174	0.19519	0.152324	-0.271987	0.397138	-0.108896	0.0278109	0.183174	0.397138	-0.228942	-0.377273	0.371966	-0.108896	-0.203679
UFGT-7	0.19088	-0.472732	0.0769573	-0.103352	-0.0600354	-0.0564022	0.664572	-0.040963	-0.29179	0.207451	-0.217994	0.19088	0.742738	0.287752	-0.590074	0.354922	0.267399	0.197604	-0.0600354	-0.36141	-0.246212	0.403938	0.259988	0.507081	0.745096	-0.179605	0.814834	0.446527	0.209114	-0.0564022	-0.374454	-0.551944	-0.383566	0.500909	-0.284069	0.664572	0.523773	-0.689561	-0.455784	0.295951	0.19088	0.149161	0.664572	0.295951	-0.193277	-0.373068	0.0791138	0.19088	-0.755346
UFGT-8	-0.477279	-0.418035	-0.0104865	0.255431	0.521148	0.216195	0.645474	0.406638	-0.722561	0.533995	-0.115652	-0.477279	0.541311	0.304079	-0.648865	0.115429	0.399871	0.160508	0.521148	-0.614651	-0.66044	-0.015832	0.381965	0.599841	0.0723846	-0.635835	0.38321	0.358418	0.15878	0.216195	-0.764147	-0.715436	-0.589629	-0.017052	-0.559963	0.645474	0.0222614	-0.533093	-0.497375	-0.219623	-0.477279	-0.202589	0.645474	-0.219623	-0.269639	-0.378672	0.454285	-0.477279	-0.611725
UFGT-9	0.198711	-0.398943	-0.172531	0.0759082	0.421788	0.115117	0.00402385	-0.200717	0.090451	0.645235	-0.119688	0.198711	0.808933	-0.243885	-0.259586	0.726665	-0.377029	0.237717	0.421788	-0.21978	-0.52916	-0.315401	-0.0728075	0.55131	0.0494639	-0.276387	0.788267	0.645627	0.896663	0.115117	-0.319193	-0.0261987	0.00409152	-0.293258	-0.179211	0.00402385	-0.0893305	-0.396312	0.10316	-0.390432	0.198711	-0.661579	0.00402385	-0.390432	0.152006	0.146719	0.0404783	0.198711	-0.358647
FLS-1	0.195189	0.343144	0.0472086	-0.168355	-0.207677	0.122875	-0.839312	-0.392865	0.734202	-0.11642	0.0703312	0.195189	-0.624701	-0.513651	0.665977	-0.0501486	-0.566141	0.00080234	-0.207677	0.50864	0.35514	-0.353006	-0.55352	-0.598885	-0.547684	0.381574	-0.577459	-0.401287	0.111924	0.122875	0.572565	0.903234	0.571874	-0.44703	0.42105	-0.839312	-0.409861	0.639652	0.620367	-0.165061	0.195189	-0.303655	-0.839312	-0.165061	0.274495	0.474517	-0.144131	0.195189	0.729491
FLS-2	0.533558	0.0915644	-0.407459	0.336349	0.255247	-0.175128	-0.477125	-0.210995	0.515809	0.126406	0.0766436	0.533558	0.355115	-0.28089	0.369617	0.654605	-0.637581	-0.180555	0.255247	0.269658	-0.0968755	-0.467553	-0.0862367	0.309941	-0.124173	0.0482455	0.57728	0.479532	0.732982	-0.175128	0.214528	0.350585	0.523439	-0.397402	0.143627	-0.477125	-0.259485	0.122321	0.573571	-0.424872	0.533558	-0.479997	-0.477125	-0.424872	0.199435	0.518483	-0.462055	0.533558	0.192169
LAR-1	0.209275	0.740225	-0.256804	0.371306	0.284257	-0.456809	-0.837892	-0.133012	0.66138	-0.373991	0.526741	0.209275	-0.30221	-0.124537	0.919551	0.176565	-0.443554	-0.298967	0.284257	0.85575	0.547706	-0.380278	-0.0796272	0.0401422	-0.465024	0.544981	-0.234727	0.180806	0.228744	-0.456809	0.777365	0.652347	0.905225	-0.36324	0.620483	-0.837892	-0.412151	0.719024	0.817547	-0.266994	0.209275	-0.0129215	-0.837892	-0.266994	0.493301	0.892939	-0.649277	0.209275	0.9028
LAR-2	0.302034	0.361242	-0.665962	0.614516	0.47113	-0.489378	-0.4072	0.203393	0.21865	-0.178676	0.294043	0.302034	0.287705	0.0736122	0.442967	0.383054	-0.514093	-0.579147	0.47113	0.284568	-0.0755296	-0.491156	0.18557	0.462728	-0.203852	-0.0340992	0.455925	0.581343	0.465809	-0.489378	0.254207	0.0290941	0.571418	-0.40557	0.0843229	-0.4072	-0.345815	0.330067	0.534383	-0.492003	0.302034	-0.203034	-0.4072	-0.492003	0.154941	0.531327	-0.664316	0.302034	0.304166
LAR-3	0.202972	0.521961	0.148549	0.177919	0.125566	-0.0809537	-0.70063	-0.33248	0.69154	-0.153694	0.37106	0.202972	-0.342973	-0.216425	0.767345	0.26039	-0.259658	0.0616779	0.125566	0.831054	0.549407	-0.239938	-0.151923	-0.0503203	-0.395612	0.588767	-0.280711	-0.0566118	0.206727	-0.0809537	0.629137	0.723703	0.701583	-0.190922	0.652341	-0.70063	-0.284935	0.5291	0.659966	-0.162547	0.202972	-0.0719921	-0.70063	-0.162547	0.507813	0.774226	-0.356758	0.202972	0.816738
LAR-4	-0.268505	0.7007	-0.676677	0.861831	0.710315	-0.628365	-0.319909	0.645531	-0.119295	-0.375353	0.574336	-0.268505	-0.101831	0.410467	0.556923	-0.132514	-0.22451	-0.78093	0.710315	0.31511	0.0514196	-0.523829	0.458741	0.467641	-0.488889	-0.0947073	-0.0599723	0.379796	0.010088	-0.628365	0.257869	-0.16304	0.489124	-0.473705	0.0427974	-0.319909	-0.580621	0.619145	0.464227	-0.54378	-0.268505	0.0794962	-0.319909	-0.54378	0.0417958	0.466836	-0.588511	-0.268505	0.468865
LAR-5	0.146041	0.625705	-0.17873	0.355919	0.157894	-0.405053	-0.776146	-0.171001	0.637033	-0.325838	0.319621	0.146041	-0.32538	-0.18705	0.890474	0.235441	-0.407684	-0.29205	0.157894	0.828317	0.455212	-0.349694	-0.146542	0.056355	-0.371214	0.4031	-0.24695	0.0271519	0.13214	-0.405053	0.671066	0.577716	0.807206	-0.304971	0.451749	-0.776146	-0.388921	0.637248	0.703608	-0.267046	0.146041	0.0214074	-0.776146	-0.267046	0.335151	0.758915	-0.613273	0.146041	0.85273
LAR-6	-0.0149972	0.913097	-0.645351	0.773668	0.550593	-0.660251	-0.600323	0.536127	0.169639	-0.599596	0.769406	-0.0149972	-0.380077	0.313373	0.815112	-0.22685	-0.352631	-0.792599	0.550593	0.557013	0.397035	-0.550631	0.334576	0.129364	-0.621428	0.283147	-0.264712	0.224444	-0.0659046	-0.660251	0.604377	0.205756	0.720331	-0.502136	0.423326	-0.600323	-0.654182	0.878696	0.731314	-0.484251	-0.0149972	0.132316	-0.600323	-0.484251	0.301921	0.66802	-0.708544	-0.0149972	0.781682
[truncated: 18 more columns]
