# Supplementary material for: Functional Characterization of AP2/ERF Transcription Factors during Flower Development and Anthocyanin Biosynthesis Related Candidate Genes in Lycoris
Source: Int J Mol Sci. 2023 Sep 23;24(19):14464. doi: 10.3390/ijms241914464 (PMC10572147; doi:10.3390/ijms241914464)
Supplement: Supplementary file 1 [file ijms-24-14464-s001.zip › Table S4.xlsx]

## Sheet: Table S4
Table S4 . The full-length amino acids sequence of LrAP2/ERFs
>LrAP2/ERF01
MKKWLGFSAKQRNWRYGSTNEETRGPKLEDFLGAYSENTNGENQIQSPKALSPIQKFYYQNATGINVNVPPCFSPSEADPQDYIFNSCQPQFQVPNTNHNPNSNHTYNIGLDGATSLSGLKSWLRQTPYPPDKQMQLCEPNASNVIQSHLYPPDNQLQLCEPNESNVVQSLSLSTSHGVQSETGQIVVATPVMGAPENRKRPASKVTNRDFAPRKSIETFGQRTSQYRGVTRHRWTGRYEAHLWDNSCRKEGQTRKGRQVYLGGYDKEEKAARAYDLAALKYWGPTTHINFPISTYEKELEEMKHMTRQEFVAHLRRKSSGFSRGASAYRGVTRHHQHGRWQARIGRVAGNKDLYLGTFSTQEDAAEAYDIAAIRFRGVNAVTNFDISRYDVKQICSST…
>LrAP2/ERF02
MRQPRVPMPPPAGFVPVPEIRYRGVRKRPWGRYAAEIRDPSKKARVWLGTFDFAEDAARAYDSAARLLRGLKAKTNFPPNQPSPPPSPPPIHQPATSSLSSTVESFSGPRVVIRSVSLRPPRVVDREVNCRSDCGSSSSVVEDGCDVASALPFDLNEMPMIDEDEDLVLRL
>LrAP2/ERF03
MASKVGDQNQAHYRGVRKRPWGRYAAEIRDPWKKMRVWLGTFDTPEEAALAYDQAARSLRGAKAKTNFPPPPPPPHVTLVDLNLRPCHISCLFGPPLASSPAAAAAPSTALVLGRGLYGGGGAHVKVGEEEEEGVARGLPFDLNEPPPPPTMTSLMF
>LrAP2/ERF04
MQTQTVDPAEKKYRGVRRRSWGKWVSEIRVPGTQERLWLGSYSNPEAAAVAHDTAVFFLRGPGHTDQFNFPDRVGGLMWTGLSPRSVQKVAGDNGEAVDAELVLRRSAMEEETERKEESCGWDCREDITLEDMDFFI
>LrAP2/ERF05
MEQFDLDSICQHLLLEDSNPNEAAVTSSPLPPAKYARTTSFNSIVADNWIDLPFLPNDSDDMVIFGILHDAFSHGWIPSPSHCGPVTPGPETPPSTVAAPPKEKHYRGVRRRPWGKYAAEIRDPAKNGARVWLGTFDTAEEAAEAYDRAAYRMRGSRALLNFPLRIGDDVAGSLPSKRESPENSSSSSATISSPKRRRKSAAAAVQSEPVLGCENRPEVFSGVRVEQLLVI
>LrAP2/ERF06
MPRTVRIFCDDPDATDSSGDEPDIHCRRVKRYVQEIRFKPKSSTVNKKKKSPKERPKAATATTATKGGETEMKFRGVRRRPWGKYAAEIRDPRRRVRVWLGTYDTAEEAAKVYDTAAIQLRGTDATTNFAQSASASDSGNEATNINPASSPTSVLHGFASTSEAVLPKKGGAEPELMKGPPLLPQDLCDFLPFEEVPLYNDFLNFGVSEPRIFEDCSAGVLGDDLGDLMLSNWQADDLFRDIDDWFPPEPL
>LrAP2/ERF07
MCGGAIISDFIPPSRSRNLTADYLWPNLNKGKNKKKSFGFEDDFEADFNEFEDESEEGESEAVDVKPFKFGAKAGFSREGSTDLKPIELDGPAERSSKRKRKNQYRGIRQRPWGKWAAEIRDPRKGVRVWLGTFNTAEEAARAYDDEARRIRGKKAKVNFPNESSKKSTKPKSIEKKKLNINPNPSFNYLNTQNLDLYSDFDFVEEKVPIKPVGYMDSFDTIKPTGFSFDCDQGSNSFEANESEFLEVGGPAKKLKSNYEEEVGTENNNTAIELSEELSAFESYMKFFEIPYFEGSTSSSDESIESLLNNEVSQPQMGLWCFDDLLIEGSVY
>LrAP2/ERF08
MELALTSSKGGRRSMIPPNAASRKSKERPWRGIRMRKWGKWVAEIREPNKRSRIWLGSYSTPVAAARAYDTAVFYLRGRTARLNFPEEVDDIVAESVVIDQMSTEFVRRKATEVGTRVDAMLVGRDGSVKVCKGLDLNELPREEDDDEYLDSI
>LrAP2/ERF09
MRLISVHIPTSSSVPLSHETCSMEDQFLNFLNSNGSLDPNTSSTLHMDMQMYQRLQEPNFSDWLLLWNHLQSDNFISPATTRNIVVSRKNDVQQHAKLYRGVRQRHWGKWVAEIRLPRNRTRVWLGTFDTAEDAAVAYDEAAYRLRGEFAQLNFPHLKHRFARGIQSPTISLLEAKLKAFRESSSSAKDVPKAKKQKMDETIGKMVKEDEFSGEFKGKRELGSLVEIDEVLLSRMPSLDMDTIWDSLQIAAAN
>LrAP2/ERF10
MNINKSKSKRKTNHQETPSSPSTRYLGVRRRPWGRYAAEIRDPTTKERHWLGTFDTAEEAALAYDRAARSLRGLCTRTNFAYPDLPPGSSLTPFLSPDVTDNFITHNLTHPSPCFYMSTSAYTDAAVSADVSSFVPPRQENHEVLNAETNAVGDESAWCDVGEFGGYDNTAMAMSTSMHGIYFEEGYVHSPLFGPMPSVNEDNGLSDGFRLEGSGSGSGWFY
>LrAP2/ERF11
MYIYQQIPNATADTAILESISQFLLADDPIPSTPNDCRDNINALSHNAATCTTATATVSAIIKSEVQDSGVEQQEEDRHYRGVRRRPWGKYAAEIRDPAKNGARVWLGTFETGEEAAMAYDRAAFRMRGSRAILNFPLRVGDYCDVRAEQQRPKRKSTTEMALSQKRRESSEQAAVKAEEMQSGSWLEIGNQKMFSIDFESVCVR
>LrAP2/ERF12
MVRSKNNKSNMKKQYKGVRMRSWGSWVSEIRAPNQKTRIWLGSYSTAEAAARAYDAALLCLRGSSAALNFPHSAPRIDIDTNTNIWSPKSIQRLAAAAANAVPPPLPPSPSMSTSLNDNTMIKEASTSSSTTTTTTTTISTTSVSVDEESTSLSSITDDRLIESWFDDLGALIQSPKCMDSVMFNSCNLFAPLQFEEFDHEVGDISLWSFG
>LrAP2/ERF13
MKSMNNNWLGFSLSPQINMEVSSESEHHTHHQSNLNTSSLFYEGDNTELYSQLSLMPIKSDGSLCIMEALNRSQNQGMVPSPSPKLEDFLGGPNIGAHDQYENNDKEATTMYYYQQVPFRNQTYFQPLQDEMYNNIYNEIEGTSIGGMGYGDLHSLSLSMSPGSQSSTVTAPSNIPSVGVNDCMALDVTKKRGSGKLGQKQPVHRKSIDTFGQRTSQYRGVTRHRWTGRYEAHLWDNSCKKEGQTRKGRQVYLGGYDMEDKAARAYDLAALKYWGSSTHINFPLENYQEELEEMKNMSRQEYVAHLRRKSSGFSRGASIYRGVTRHHQHGRWQARIGRVAGNKDLYLGTFSTQEDAAEAYDIAAIKFRGASAVTNFEITRYDVEKIMASTTLLSGEHAR…
>LrAP2/ERF14
MEKASSPRGKNAAQVRYRGVRCRPSGKYAAEIRDSNRGGVRVWLGTFNTAEDAAKAYDRASYAMRGPFAVLNFPEEVNSSAVLSSRRTNVSVKMDKTQMIELECLDNKLLDELLENEDRNG
>LrAP2/ERF15
MERECCSTSSQTQINNPQSSSSSSRRSNSKTQLPANPKERSIYRGVRMRKWGKWVAEIREPNKRSRIWLGSYSTPVAAARAYDTAVLLLRGRSARFNFPDEILTEEEGEGGAVNGSESLSAAFIRKKASEVGNRVDAMQTGVLMPCSAPSGSPRRKNPDLNQEPSPDSSDDEYLS
>LrAP2/ERF16
MEQHRQQFSNLLFSDPCHVSTALSSILLSGPNALDSIFSHLPPPPPPVIPSSSLSSSSIYTQLHTQLLNSTSAAAPAKKWMTKLYRGVRQRHWGKWVAEIRLPQKRVRVWLGTYDSPEWAAHAYDRAAYKLRGEYARLNFPHLKNVGAADCSEKMRTLRSAVDAKIQAICSRIGRQKKKGKKDTVEESKKEEVLDLHLDLDLDLVGPALAVGTESSCSSISEGSEMDGEYSLSRMPSFDPELIWEVLAN
>LrAP2/ERF17
MHLYIYIIIVMITTTKLKRVGSGESTVIDPPENIGLEAESKKLPPSQYKGVVPQPNGRWGAQIYEKHQRVWLGTFNLETDAAKAYDVAAQRFRGRDAVTNIKPLSESDESDLAELDFLNFHSKAEIVDMLRKHTYDDELLQKKHTINSRRGKNSSSLMQSSSSSSETASNSIREHLFEKTVTPSDVGKLNRLVIPKQHAEKHFPLQIARTDGGEKGILLNFEDEIGKVWRFRYSYWNSSQSYVLTKGWSRFVKEKSLQAGDVVSFQQYYLSEGRNEKQLCICCKPRAKPIQVVRLFGVNIFKSESLENGWDMNSHGKRRSSTDCSGDLDFFLKKQCVGAL
>LrAP2/ERF18
MYQKVDRRHGKRPLPYNSHELREEKKPQKQQQHVLPNPTSRADQDSSAMVSALVHVISTCDAGDRPAVSLPPEATQPAAATEDQLQGSNVSKKHYRGVRQRPWGKWAAEIRDPKKAARVWLGTFNTAEAAAIAYDDAALRFKGTKAKLNFPERVQDQTDLGGFLVSTNADQPTQPLYPHLIQYAKLLQSGRDEDLHNVASGLYGTSSALGPTALQFSSGSNLPSSPSEFLDFSSSYNVNVGCSSVSDSLSSWSTGGNHKEKDGESKQ
>LrAP2/ERF19
MASTITDDNVATLDLICNSILSEDLASLDALLAADVPPKPQKSNGNPVQTSDTIVTGSFTFAERPAGNMIRFGPGLPNQPAADHRRPSLTIALPPAPKIEWGPAIGTSGSKTSQPNDGRRYRGVRKRPWGKFAAEIRDPNRRGSRIWLGTYETAIEAARAYDCAAFKIRGRKAIINFPNEIGSSVANPLATETGKRKIEETEEEEERRVKKERVDETAEPLTPSSWTGFLEGNDGNEIFSLPMLSPLSPLPSLGFPRMMVT
>LrAP2/ERF20
MNMEQFDLDSICQHLLLEDSNPNEAAVTSSPPPPAKYARTISFNSIVADNWIDLPFLPNDSDDMVIFGILHDAFSHGWIPSPSHCGPVTPGPETPPSTVAAPPKEKHYRGVRRRPWGKYAAEIRDPAKNGARVWLGTFDTAEEAAEAYDRAAYRMRGSRALLNFPLRIGDDVAGSLPSKRESPENSSSSSATISSPKRRRKSAAAAVQSEPVLGCENRPEVFSGVRVEQLLVI
>LrAP2/ERF21
MAPRDISTSAAAAAAAKAAAGAVTVASSGVKEVHFRGVRKRPWGRYAAEIRDPGKKSRVWLGTFDTAEEAARAYDAAAIEFRGSKAKTNFPYPETLVVTPANGGGGGGSPSSQSSTIESSTPPPPALPPRRDLDLFACRPPPAMPARFPFHHYPAAPAEVKACNPMFYFDAIVRSEKGMVRSPLILTDFRTPMATSGAHSDSDSSSIVDVAPPSPAKKRSLELNLDLNKPPPPEIA
>LrAP2/ERF22
MAVETLRLTKHFAGGELQSPPPPLPAKELRYRGVRKRPWGRYSAEIRDPLTKTRKWLGTFDTAEEAARAYDEAARNLRGSKAKTNFVSEPEPEIRPDLQLFIGSAPAAKKMKRPLMIDLNLPPPM
>LrAP2/ERF23
MVQSKKYRGVRQRQWGSWVSEIRHPLLKRRVWLGTFETAEEAARAYDDAAVLMSGRNAKTNFPIQKAGDAQSSENHSATISSKNLSEILSAKLRKCCKTPSPSLTCLRLDTEKSHIGVWQRRAGGRADSSWAMTVPLSEMEEPVVKGDPLPSPSTSPEGTSEGIDDEERIALQMIEELLNRNCPTSPSHGETRSQDNFF
>LrAP2/ERF24
MSSNMEGSSTLDDLAASADSSRSKHLPFPPPHVQLLPLQRMGSGSSVVLDDGHEQFQHDAARQQIGFRNCAMAADVAESRKLPSSQYKGVVPQPNGRWGAQIYEKHHRVWLGTFDSEAEAARAYDVAACRFRGRDAITNFAPIDDEPELEFIGSRSKAEIIDMLRKHTYHDELTQSKRSRSGGPHKRKISSYKTEADREQLFEKIVTPSDVGKLNRLVIPKQYAEKHFPLKTGSLLLSFEDECGKVWRFRYSYWNSSQSYVLTKGWSRFVKEKGLKAGGTVIFQKAVGAEKQLYIECKLGAEIIKPVPMIRLFGVNISEVPIKRKEMEFLPLTKKQCVRDQ
>LrAP2/ERF25
MLYNIKVDPQRHGKRALPSYDADKDQKKEEETYHNFSSFYTCSRGDEDLSAMVSTLSHVIGTGPQGGGNTSSTERELQQLSTSQENASQETRKHYRGVRQRPWGKWAAEIRDPKKAARVWLGTFDTAEDAAMAYDRAALRFKGTKAKLNFPNLVQEYYNTINSDHQPNRPAHAHVAESVALQTQESTYPDLLQYSQILQSSGDDQDLHSMFGSEFWGSSSSTTSSSTTSSSSRAKGKKGND
>LrAP2/ERF26
MAASSSSGPKVESGGGEGIDPHLHHPHHQDVFLGSATTTTMHVAKKARRERACTAKERISRMPPCAAGKRSSIYRGVTRHRWTGRYEAHLWDKSTWNQNQNKKGKQVYLGAYDDEEAAARAYDLAALKYWGAGTLINFPVSDYSRDLEEMQMVSKEDYLVSLRRKSSAFSRGFPKYRGVSRQPQGTRWETSFGQMPGCTDPSVEGKYGAGGFGIERKIDLTPYIRWWIPKKSLQSESGEDIGRELRALECSSGKPTEPYQLPSLGLPQKGKAHTTRDSSACSILSKSAAFKNFVDKASQMGKTETCATKEMDHGKAPVPILFGAGSELDIDRSVGITMGMTDIPVQRTPYTLSPIFSTPLRTDWNPVDPVPDPVFWTSLVPPTSQSVTATLKKNDIGAS…
>LrAP2/ERF27
METQTNYITSRATPSANSDEETSYATISSAPPKRRAGRTKFRETRHPTFKGVRRRNADRWVCEVREPNKKSRIWLGTFPTAEMAARAHDVAAIALRGRSACLNFADSAWLLPVPESKSPRDIQRAAALAAESFRPQNNVMHADVASDYKSGAGQGEISNAVSRSDGFLFVDEMQGYFDDMAQGMLIDPPAMMTFSDEGENDEGENDGEMSLWSYSI
>LrAP2/ERF28
MCGGAIISDFIPQRRGSNNFWPDSASSNPQPKAPRKRERKNLYRGIRRRPWGKWAAEIRDPSKGVRVWLGTFNTAEDAARAYDREARRIRGRKAKVNFPNEDLFSAAVAAASPATPPPPPPPPPVKAEVESLREDLMAYENYMDLFGGVQFGVAEVAADATAVDDGGLWSFDDLMRVVF
>LrAP2/ERF29
MVSLRRRRLLGLCSGKSSSPVQISGSSGRVNTVENPNKNAKPLRVHPFPSAVLSHQKPPNISEATIASSNISASSSSKEDTGNYYPGKKLKRRKRHRRKHYEDQEPCIMRGVYFKNMKWQAAIKVDKKQIHLGTVGSQEEAARLYDRAAFMCGREPNFELSEEEKRELSRYKWEEFLALTRNTITNKKQQRRVGVRGRRPKKSGNELQSSDYELERGTGGSSISENSVS
>LrAP2/ERF30
MNRTDLVGGAPFKFSEHVTRAKKLVPKDSRKIPTMKLIKIHYTDPDATDSSSGDDDGDPTVRRRVKRHVHEIEIATSAPRRKPPPQPKMTAKETEVDVRRRFRGVRRRPWGRYAAEIRDPNQRKRLWLGTFDTAEEAATVYDNAAIRLKGEKAVTNFPVPTPLPLPSTSSSPAETAMESGESMENEKKPFLSSCDLSSPTSVLRNGGEQAPFELFNFGDVDALGFSVDPPFLLTDVSFPSTNSWKEEKFADFDVEDFGVIFGCV
>LrAP2/ERF31
MPQGVKRAGIVNVTIRPLPKHRPGAAVPFPRTLRIFCDDPDATDDESDIHCRRVKRYVQEIRFEPKPSTSTNKKKKKSPRAMATTTNGGETITKFRGVRRRPWGKYAAEIRDPWRRVRVWLGTYDTAEEAAKVYDTAAVQLRGPDATTNFAQLPSVSVSDSGDEATHINPISSPTSVLRGFTSNPSASSTVSPIKCKAEPELMNAKPLPPQDLCDFLPFEEVPLYSDFLEFGVSEPRIFENCSVRVFS
>LrAP2/ERF32
MNRTELVGGAPIKFSAHVTRAKKLVPKDSRKISMTRLIKIRYTDPDATDSSSDDGGGNPAGLRRRVKCHVHEIEIATSATRQKPPPKPKKTAKVTVVDGRRRFRGVRRRPWGRYAAEIRDPNQRKRLWLGTFDTAEEAATVYDNAALRLKGEKAITNFPLPSPLPSTMESGESTENEKKMFLSSCDLSSPTSVLRNGRNGGEHTPFELFSFGDVDALGFSVDPPFLLSDISFPNTNFCKEEKFADFNAEDFGVIFECV
>LrAP2/ERF33
MTTITKLQPVGSGESTVVDPLENFGLLEAESKKLPSSQYKGVVPQPNGRWGAQIYEKHQRVWLGTFNQESDAAKAYDVAARRFRGRDAVTNFEPLSESDEADLAELEFLEFHSKAEIVDMLRKHTYGDELLQKKYTSINSSRGGRFTQSSSSSEKAVVREHLFEKTVTPSDVGKLNRLVIPKQHAEKHLPLQNIISSNNNNGILLNFKDDIGKVWRFRYSYWNSSQSYVLTKGWRRFVKEKSLQAGDVVSFHQYYLDDEDNKNEKQFYIECKPKLAKPIQVVRLFGVNINFQPYKVESLEINNGWNNKISMNSNGKKRSPSSGDLDLFLKKQCGGAL
>LrAP2/ERF34
MATAIDMYNNSRKSSSFSSYDPLNEELMKALEPFINGASSISSSSFAPSPSSHYSSSSPPSTITFDSPNSLTPASPYTFSPFPSQQYPIFDQFSPSKSNLLSMNQADLNNLGPIGLTQLSPLQIQQIQAQIQLNHQHQLMISRTLQARNNHLGVKAQPMKLASSSSLSKPTKLYRGVRQRHWGKWVAEIRLPKNRTRLWLGTFDTAEEAALAYDRAAYKLRGDYARLNFPNLKQSGVHSVGGGPLHSSVDAKLQAICESLEQNSPSKKQKNGNGSNGNVSESKVEPVPVESDESCLSSAGSSDTNSPVLEMECLDFTAVPWDESEDFVLKKYPSWEIDWDAILS
>LrAP2/ERF35
MERSRKSSESSEKGVVGSDINRRQKKGKGMELRMLESEKHQQQQQKVPIFEEASFATNLSPLTKIRSPDGSPCYSSVSNPPTPTAPFSSRPVFPFSSSDTTASHNFNPNQHPQLQQQMISFGVQSHPSIFTQDGQAMATAAQQQIYQEQLLRHWSQALNLSPRGHRLMMDRLAAAQSSNRSSLSSTLYSALFRSPAMMPAVSTPTKLYRGVRQRHWGKWVAEIRLPRNRTRLWLGTFDTAEDAALAYDREAFKLRGENARLNFPRLFLGKSSDGSLGNVKDGASCSSSSSSAPATPSVDAETLSAIIDGRPEETIVKESDPQPIISGPTTTSQPELAWGDAEEVWFSKWGPGSSLWDDVDGANSLLLQSRLSAVSEAATQENQEMVTSASPNPHSCSPS…
>LrAP2/ERF36
MISTSAAPETPTRPKTKLVRVSFIDADATDSSDNEQEEADRRPLKRHVEEIRIAAAAKPAAAKETERSGKKYLGVRRRPSGHWAAEIRDRILRKRLWLGTFRTAEEAAAVYDAAAVRLRGSKAVTNFPRSNGGS
>LrAP2/ERF37
MATIIDMYKKSNSSSVDPLNGELMEALQPFIKSASNSPSSSSIATAQLPSFSCDRQNPNFDMISYPQTPNFYDHSLNFFDQSPNFTLPQLNPAQIHQIQAQFQYQQLQQQSQLFASSSSSDYYQTNQRRLLGPKSQPMKPSLPLSKPTKLYRGVRQRHWGKWVAEIRLLRNRTRLWLGTFDTAEEAALAYDKAAFKLRGDYARLNFPNLRRNGSHFGPPLHSSVEAKLNALCDNIESNVPKQGKEKNVEDQAIKEDNKSEASSENEVVELNGSCETKQSDFEDKSWDEMECLLLQKFPSLEIDWDSILN
>LrAP2/ERF38
MECQLPHSTSSSNEEETKMMCYAFKYATVMSSPPKRRAGRTKFRETRHPVFRGVRRRGKGERWVCELRDPNKNSRKSRIWLGTFPTAEMAARAHDVAAMALRGRNACLNFADSAWRLTLPCSASRDDIRKAASVAAEMFRPLQSSDETDADQEQSTSMLESDCSTSKPVTVGVCNDGFDAAEFSSDAYDWDAAFTEQISNYSDGYCMDDHDMEYCVADVSLWSYSI
>LrAP2/ERF39
MCGGAIISDFIPPSRSRNLTADYLWPNLNKGKNKKKSFGFEDDFEADFNEFEDESEEGESEAVDVKPFKFGAKAGFSREGSTDLKPIELDGPAERSSKRKRKNQYRGIRQRPWGKWAAEIRDPRKGVRVWLGTFNTAEEAARAYDDEARRIRGKKAKVNFPNESSKKSTKPKSIEKKKLNIKPNPSFNYLNTQNLDLYSDFDFVEEKVPIKPVGYMDSFDTIKPTGFSFDCDQGSNSFEANESEFLEVGGPAKKLKSNYEEEVGTENNNTAIELSEELSAFESYMKFFEIPYFEGSTSSSDESIESLLNNEVSQPQMGLWCFDDLLIEGSVY
>LrAP2/ERF40
MEEPNITSPSSSSSESSTSSSVDLKSSKKRSNEVVDEALIKKRSNKDTKHPTYRGVRMRNWGKWVSEIREPRKKSRIWLGTFPTAEMAARAHDVAALTIKGQSAYLNFPELASQLPRPASTSPKDIQAAAAKAAAITFSDRRVINEPDLINRPMPCSDNDEDALFDLPDLLLDIRDNFSSHSSIWVSSAAEEDYIGFRLDEPLLWGFC
>LrAP2/ERF41
MKQEEKTEQREDFRGRMEGNGEIPMREKAMDELQRTSEEKKASRRRRGNSLEEILRKWKEHNKLQEVTNSENPIRKVPAKGSRKGCMQGKGGPDNPNCKYRGVRQRTWGKWVAEIREPNRGSRLWLGTFDTALEAALVYDNAARTIYGPNARVNLPVSSTGSIMTSESRDSTTSSQYCNSTERPKEIKIPKVEEGDDKPKGEEGLFEHADQIQDLPEDMFDVEDFLRFVDGDPACGITSDMIIDTNTFLHDDGSPFLLQNMDMDQQTVSLDYRYDFIRPMSQDSNYSFVDDREMNATKLSDVGFSSEFSKKQGS
>LrAP2/ERF42
MPGPQRQLLNHNKMRGRIAAKNLPSKPSSEQIFGQKIRKIRILFDDPDLTDWSSEEDEDRIVTQKMKRVVKEVSVNPYPSHSGTSSCSKSPKTPKARKVSKPDKPKTRPGSKYRGVRQRKWGKWAAEIRDPIRGVRRWLGTYLTAEEAYEAYLAASDRLKAEKLALEATAASATSSVANAEMDGQDQPKNEMDAQVELKKNAAVMDKDNEHLQQLEPPIADLFEASTSMLPIPALDFGFETDTFLMGDLGDDLAGLNDLPLWEQQFDGGDDFSFLDQYDTPSTKFCSLVV
>LrAP2/ERF43
MKDREINGSGSKEPDPPPSDVPEVSRRSGDSLEVTVAMVSPKKVGSLLSAAMKKYAVPRSSCFHGVTKLKWSGKFEAHLWDNTSQVEGRKRKGKHVYLGSYDSEDKAARAHDLAVLKYWGPTHSAKLNFPVSDYVKELETMKSMSQDEYVAHVRRQSSSFSRGASVYRGVTRRKDGKWQARIGRIGESRDAKDIYLGTFDSEKEAAEAYDIAAIKLRGVQAVTNFDISNYCEEIDKGSCKFES
>LrAP2/ERF44
MKFQLVNLTLHFISPLKSFTPSLYSKTRIWLGTFETAESAARAYDEAARLMCGPRARTNFQYNPNSSPTSKFLSPALTAKLHKCNMISLQANNPINVKNNSGSNCTKTQKPILPVEKEEATWDFKEDVNREIQWSYLEEHHIEQMIEELLDSGLSIELCSNTL
>LrAP2/ERF45
MCGGAIISGFIPPAPRSRRVTAGHLWGSYGSDKKLRKERTVEIEDDDDVDFEADFQEFKDEQEEEDEMFDGMPLRFPSNQAPLKDTSKPKPVDFKGLAEKSAKRKRKNQYRGIRQRPWGKWAAEIRDPCKGVRVWLGTFNTAEEAARAYDAEAHRIRGKKAKLNFPDEAPQPKPSPQFKAPNPNLSKKLDFNPHPEFYSTIGFFEEKNPVKPEELLTFQSDQGSNSLDCSDFGWGNEMTKAPDVTSLTPPTIIRGNESEILEYDSCNPQKKLKNNLGEGVAANENAAMKLNEELSAFESYMKFLQIPGDQVGSEESFDGLFTSGVDAQDNLWSFDDMPIIGNF
>LrAP2/ERF46
MFSLSPHINNIEEPSSSSVPNTVQNCNFFLSPTNTNTPSLCYEGENAGLYSQLSFMPIKSDGSLCIMEALNRSQNQGMVPSPKLEDFLGGCGPSTGAHHHHYMNNDGEATTMYYQPLQEMYHQPILENEAMADEDEFPSLKNWFTMNYNEMGYGDLQSLSLSMSPGSQSNSVSAPMTLGVTKKRGCGKGGQKQPVHRKSIDTFGQRTSQYRGVTRHRWTGRYEAHLWDNSCKKEGETRKGRQG
>LrAP2/ERF47
MGRGATDQPNNSEPESSNNSTRSSPSAPNPITETSTPVYKPGANKRVRDTNNKHPLYRGVRMRAWGKWVSEIREPKKKSRIWLGTFPRPEMAARAHDVAALSIKGNSAILNFPNLIGTLPRPVSLSPRDVQAAAAKAAAMEVASDDVVDSTPSDELGEIVDLPRLGGSLFDSADLGSEFVCYDPVDPWAYPDQCGFLSDQMLDPNCFEGLLWDY
>LrAP2/ERF48
MRKARLPAPPPAPATGSAPEIRYRGVRKRPWGRFAAEIRDPFKKARVWLGTFDSAESAARAYDAAARHLRGAAAKTNFPPDPPPPPPPPPPATISLSSTVESFSGPRLIARSTVRSAPRVAIGEGDCRSDCGSSSSVVDDDGDVASVYCPSPLPLPLPFDLNELPPVEEDLQTTALRL
>LrAP2/ERF49
MCGGAIISDFIPPSRSRNLTADYLWPNLNKGKNKKKSFGFEDDFEADFNEFEGESEEGESEAVDVKPFKFGAKAGFSREGSTDLKPIELDGPAERSSKRKRKNQYRGIRQRPWGKWAAEIRDPRKGVRVWLGTFNTAEEAARAYDDEARRIRGKKAKVNFPNESSKKSTKPKSIEKKKLNIKPNPSFNYLNTQNLDLYSDFDFVEEKVPIKPVGYMDSFDTIKPTGFSFDCDQGSNSFEANESEFLEVGGPAKKLKSNYEEEVGTENNTAIELSEELSAFESYMKFFEIPYFEGSTSSSDESIESLLNNEVSPPQMGLWSFDDLLIEGSVY
>LrAP2/ERF50
METMTMMPEDTTLTVPAASSAQVLSRYHQEQELSAMVYALSRVVAGDDGVSAANPDLSPNSSSHFGYLGHSSPSSSSRLMQYYYDHPGHSDQVAFVGGGGYSGGEASSTFMSGTNTSTMPTSQTSTPQTQSPTTTTTEPQTTVRRKYRGVRQRPWGKWAAEIRDPHKATRVWLGTFETAEAAARAYDQAALRFRGNRAKLNFPENVQRRAPPPQNTTNPASSSTSRDYLEYSRQLQGAGEYQTVSSVSLLDQLLAESSVSTSSSSSSSPSFYSPDAVGNQMGYLGSDIPFSSWMDPTQFPPPPPPSG
>LrAP2/ERF51
MPKLQRYRGVRQRHWGSWVSEIRHPLLKTRIWLGTYESAEAAARAYDEAARLMCGPNAKTNFPIDPDHPIPPPQALSPSLMAKLERCCVASREEAAAQRGKVAAVKEEYYCMEDDDECIEEMIEELIYYGSVEINPCSSSSCSSSSSSSMGWYGN
>LrAP2/ERF52
MVPKREFSFNFNFNFNDQITSTKPTQNLTMPAPFLSRLTPEQEHSIIVSALIRVLSGDNSLTSSPSAAAIFADIPYKGTCRQCGINGCIGCELFAGPSAKAAATTVVAAAETNKQSRSKRKTKKKNKYRGVRQRPWGKWAAEIRDPRKAVRKWLGTFDTAENAARAYDRAAIEFRGARAKLNFPFPVQEEQRQQEVEEQVQQQQELQQSKVHVNEERGLWDDLQDLIELDDGELWSAWSSAGYLQ
>LrAP2/ERF53
MSTLDLIRQHLLADTDDLGYSNPNPTRNTDADITNPIRLDRRPSLTISLPSRSDKQQQQHPDPNDARWYRGVRQRPWGKFAAEIRDPNRRGSRIWLGTFETAVEAARAYDRAAFQMRGRKAILNFPNEIGFSVNDDLLSLSLPLPLAMRIKRGREEDEEKNINVKKERVGETAETLDCPLTPSNWMGFLDWSGNGIFELPLLSPHPPKGFSQLVVT
>LrAP2/ERF54
MWREIIINHLLKAKRSTMLDLNESPNRQIEEDEEEEQNKENENSSSSIQSDHGNDNPVITHQLFPADEPKSWDFGGKPLPQSHWVGVQFKHSLERLDATKSIKKSRRGPRSRSSQYRGVTFYRRTGRWESHIWDCGKQVYLGGFDTAHAAARAYDRAAIKFRGAEADINFSLDDYNEDLEQMGSLSKEEFVHVLRRQSTGFPRGSSRYRGVTLHKCGRWEARLGQFLGKKYVYLGLFDTEVDAARAYDKAVIKCNGKDAVTNFDPSIYSDELDLNSYDFGHNLNLSLGSSGSKSCNLDQIDEKSSVGMDQRVPMDLETDWRSSNQNALTKFPSNNDGARTEDALSLSIGGEQQKHLELGRAGIDWPPSAQMLATTSAASSGFSPQTIKSAPSWLQKNTT…
>LrAP2/ERF55
MAKQRNWRYGSTNEETRGPKLEDFLGAYSENTNGENQIQSPKALSPIQKFYYQNATGINVNVPPCFSPSEADPQDYIFNSCQPQFQVPNTNHNPNSNHTYNIGLDGATSLSGLKSWLRQTPYPPDKQMQLCEPNASNVIQSHLYPPDNQLQLCEPNESNVVQSLSLSTSHGVQSETGQIVVATPVMGAPENRKRPASKVTNRDFAPRKSIETFGQRTSQYRGVTRHRWTGRYEAHLWDNSCRKEGQTRKGRQVYLGGYDKEEKAARAYDLAALKYWGPTTHINFPISTYEKELEEMKHMTRQEFVAHLRRKSSGFSRGASAYRGVTRHHQHGRWQARIGRVAGNKDLYLGTFSTQEDAAEAYDIAAIRFRGVNAVTNFDISRYDVKQICSSTHLIGSDL…
>LrAP2/ERF56
MATAIDMYNNSRKSSSFSSYDPLNEELMKALEPFINGASSISSSSFAPSPSSHYSSSSPPSTITFDSPNSLTPASPYTFSPFPSQQYPIFDQFSPSKSNLLSMNQPDLNKVGPIGLTQLSPLQVQQIQAQIQLNHQHQLMISKALQARNNHLAVKTQPMKLAQAKPTKLYRGVRQRHWGKWVAEIRLPKNRTRLWLGTFDTAEEAALAYDEAAYRLRGDYARLNFPDMKHGLVDGPLPSNVDAKLEAICQSLGNSNKKECGGSESKPVVVVDSDESCSSSSSSSAGGTITNSPASEMGSLDLDFTLVPWDESEDFVLRKYPSWEIDWDAILS
>LrAP2/ERF57
MYSPFFDSLCYEFLPSDSYTGSSSGFFCDQSSMFADALTEFESVNSVNDAITTSPESSESSDSNQITDEKKSEEKKPYIGVRARPWGKFAAEIRDSTRNGKRVWLGTFESAEAAALAYDQAALTMRGVNAILNFSVEHVLDSLHELDCKHVGGSPVLALKMKHLMKRKQSRRMQRAAKMSTTTRENVLIFEDLGAEYLEELLRISDEAGQS
>LrAP2/ERF58
MEKSPCTSTKTLTITVDPKISNRHRRRRRSCSDSKEEVLEIQSMGELQRKRRLRRRSDGPNSLAETLAKWKEFNRQQDLSVYGVKPTRKIPAIGSRKGCMQGKGGPENSHCNYRGVRQRTWGKWVAEIREPNRGSRLWLGTFATALEAASAYDEAAKAMYPTARLNFPNHNTCSNEPSTATESCDSTTTTTSHPISVSGVVDFELKAPKLEPKEEDICGGSSQKPETEKSVGEELLFENLDHIEDLPEEMFDIDDMLRLVDADQNVPNNGDRLGADVGGANWQNWPYGSPAAYVVQQEMEPGMDDGYNFIRPMRQDMDYAPLMDPDTFDSEFAVLQNSI
>LrAP2/ERF59
MSSNLEPCANSLSPSSSSSASSSTLSSSNSATTKVKRARKTGTNGGHTYRGVRMRTWGKWVSEIREPRKKSRIWLGTFPTAEMAARAHDVAALSIKGPNAILNFPELSGSLPRPASSSPRDVQAAAAKAAAMEPMVLPNSDELGEIIELPKLNEDWDRLGLREFVYCDLVESTTGAYLPPWMDGADEFGFLSQCVLDDKVESFEERGGGLMLWDY
>LrAP2/ERF60
MRKALVPAPPPTPAAGSAPEIRYRGVRKRPWGRFAAEIRDPFKKARVWLGTFDSAEAAARAYDAAALHLRGAAAKTNFPPDPPPPPPPPELHRPATSSLSSTVESFSGPRLIARSAVRSAPRVAIGEGDCRSDCGSSSSVVDDGGDVASVYFSTPLHLPLPFDLNEMPPIEEDLQTTALRL
>LrAP2/ERF61
MCGGAIISDFIAFKGARNLARSDLLSSEVENLNESFEIKEWNLRNQQGEQRPCEKRKRSPETNKSSPNRGGKERKNIYRGIRKRPWGKWAAEIRNPRKGVRVWLGTYNTAEEAARAYDEAACEIRGSKAKLNFPNKISAMKKRWLEAEPDLSSASWSSAFDGGLKEQIMSLEAMLGLEHETAEPSNDIALWDDLY
>LrAP2/ERF62
MTQSHQPQKPFPPSKSTTPSNRTLIRNSPAMRKPRVPIPPPAGSTPVPETRYRGVRKRPWGRFAAEIRDPYKKARVWLGTFDSAEDAARAYDSAARLLRGPMAKTNFPPNPPPSPPSPPPIHRPATSSLSSTVESFSGPRAAVKSVRSVRLYPPRIVDREVDCRSDCGSSSSVVEDGGDVASAFPFDLNEMPVIDEDEDLALRL
>LrAP2/ERF63
MNVHKQKVAKSKLHVSFYLYNPPSLFTTQYGFKNKYYKKRKKPKFCCIYACNKYYKVANQGEASDEISQFFSNVDKEEELTAMVSALTHVMGGQSGGGSSSGGIKREREETAMSEPATATAKFYHGETSSIALGGAEQSQQVQVTPKTEESSPSFSAEAEQGARRRYRGVRQRPWGKWAAEIRDPHKAARVWLGTFETAEAAARAYDEAALRFRGNRAKLNFPENVRLRPPPPPPQQQQQQPVTQQMQSFSGLQSSNISREYLEYSRLLQGTGEYQRNIPSASLLDQMLYATSNVGTGTPNVLSFSLPTVSSSSSSSTSSSSSYPLLYSTQQQMSYFRQPPWTDSNYRYPPPSSG
>LrAP2/ERF64
MQEQDKGDAPLPHYFFFPFSIPNYLSTTPPQNLNAEILERERFEKKLALEREKKVGLLNSLHRVRKRYKGGILVVEFFGMGDPVTFQFFPVCEQAEDGIRGGEVTAPPKVAQWAEVRFVEKGADVAPAAKKSRRGPRSRSSQYRGVTFYRRTGRWESHIWDCGKQVYLGGFDTAHAAARAYDRAAIKFRGVEADINFNLSDYEEDLKQMSNLTKEEFVHVLRRQSTGFPRGSSKFRGVTLHKCGRWEARMGQFLGKKYVYLGLFDTEVEAARAYDKAAIKCNGKDAVTNFDASIYGNELNSVDTIAASHNDHNLELSLGSLSSKRNNLELIDEEGSVRMDQRIPMTLGSDQKRNTRPKFPGNNDVAIAIGGGLSLSMGDEQTVLSSKLLTASTAASSGF…
>LrAP2/ERF65
MQALEPFINGASSTSSFASPPHYSSSSSSTITFDSPNSHSPSSPYSFSPFPSYQKPIFDQFSLLKSIPLSMNQPDLNKVGPIGLTQLSPLQIQQIQAQIQLNHQRQLMISKTLQARINHLGVETQPMKLSQLSKPKTQPMKLAQSLKPTKLYRGVRQRHWGKWVAEIRLPRNRTRLWLGTFDTDEEAALAYDKAAYKLRGDYAKLNFPNMKHSVLNGPLPANVDAKLEAICQSLGNSNQKEASGSESKPVVIDSDESCSSSPLSTGGTNSPVSEMEGLDFLTAVPWDESEDFVLRKYPSWEIDWDAILS
>LrAP2/ERF66
MAAMVSALTRVMGGGGGTGGGVKREREEMEVAEPDMRFYRGFGELGGLVHHGDQPSSSILAAGSTEQGQQSHVTPKTEEPSSCFSTGPEQSKTPRRYRGVRQRPWGKWAAEIRDPHKAARVWLGTFETAEAAARAYDEAALRFRGNKAKLNFPENARLRPPRQIPQATHLPPISTSSSALLEPRAFSGDYLEYSRLLQGSGEYQRMLPPGNSLLGQYSNVSHSAPSSSAAASSSSSSAPLFYSTQQEQISSTFQVPPWTDSSKYRPSPSSSSSQ
>LrAP2/ERF67
MPGPQRQLLNQDKMRGKFGKKTLPKSSPSQMFVSKIHKIRILFDDPDLTDSSSEDDEKENKKKHKRALKEIPFSVNPSLSKISGSSKTPAKTPERSKPDKPKSESKSTMQTGRKYKGVRQRKWGKWAAEIRDPIRGIRRWLGTYLTAEEAHNAYSAAFDRLQAEKQAIVASATSSSFSVPSPSSILGLDGQDQPRLEMQQLMEPMVADLFVEDPLAIPESEFGFETDAFLMGDLGNDFVGLGDLPMWEQQFDCGDFSFFDRQETQQIFAA
>LrAP2/ERF68
MQHFSSSYKKQSKKQSSNNFFLYINFLFFMAPRETSAPVTAVGVGGGRDHHYRGVRKRPWGRYAAEIRDPSKKSRVWLGTFDTAEEAARAYDAAAREFRGSKAKTNFPCPENCGNGSSPSSQSSTVESSIPPPPPTMATPLALTAPLDLFRNGGVRFPFPCPPQMFYFDAIVRSEKAMMLTAADFRTAVASGSVQSDSDSSSVVDVAPPPPAKKRVFALDLDLNLPPPPEIA
>LrAP2/ERF69
MKSGTPARPAWRSGPTSPPHRCLPDLCTRKAANACSPSSSSSSSSSSTTATNNNINKSKSKRKTNHQETPSSPSTRYLGVRRRPWGRYAAEIRDPTTKERHWLGTFDTAEEAALAYDRAARSLRGLCTRTNFAYPDLPPGSSLTPFLSPDVTDNFITHNLTHPSPCFYMSTSAYTDAAVSADVSSFVPPRQENHEVLNAETNAVGDESAWCDVGEFGGYDNTAMAMSTSMHGIYFEEGYVHSPLFGPMPSVNEDNGLSDGFRLEGSGSGSGWFY
>LrAP2/ERF70
MLDLNVEKLPMEDSSTSNSSVLNEDEDACSDRPLGFQFGILKNRDDDGDDGEGFVTKEFFPPPPPPAAAAAATSSSAMVHCQQQQVKKSRRGPRSRSSQYRGVTFYRRTGRWESHIWDCGKQVYLGGFDTARAAARAYDRAAIKFRGVDADINFNLSDYDEDLKLTRNLSKEEFIQTLRRQSTGFSRGSSKYRGVTLHKCGRWEARMGQLLGKKYMYLGLFNSELEAARAYDKAAIKCSGREAVTNFEPSSYDGEMHPEADSEAIGHDLDLNLRISQPNVSSPKKSGSPMGAHFNLGSFEASEAKKAWIDNSSSILPGLPQSTAMTSEHPRVWTALYPGFYPSNEERATEKRPMIGSSVLPNWTWQMHGRTAPSSLFSSAASSGFATTTATAAITSPTT…
>LrAP2/ERF71
MAVETLNLTKDSLAADTQPPPPLRLHYRGVRKRPWGRYAAEIRDPWKKTRKWLGTFDTAEEAARAYDDAARNLRGPKAKTNFGSEIDAAEIQPVRLGSDRIDGRDLFLGPPGGRSMAAKKPLMIDLNLP
>LrAP2/ERF72
MNRPSSLFCHLQNHQLSSCRSHSKKKKKPKMLKPSPSSSSSSPFNPSPNGHQIPPVKPRLKRTRRARDANEARSSPGQTKRSSIYRGVTKHRWTGRYEAHLWDKLSWNQMQNKKGKQVYLGAYDEEEAAARTYDVAALKYWGPDTLLNFPISTYEKEYEEMQSMSREECMASLRRRSSGFSRGASKYRGVAKHHHNGRWEARIGRVYGNKYLYLGTFNTQEEAARAYDLAALEYRGTNAVTNFDIGLYINRAPQIQNQIPTQHQQQIFADQQPPQLPLIPNEFPTTTVNNTLPADGPYCNYSLPNLTQDFVDDPVPISNFDCYNVTNVTEPTTCVDMINIDCSGGFLDFLESDGFMDNIDCLFDECGLLGSCDVNVDATSGDLDGSAEATAQAEIDLDQ…
>LrAP2/ERF73
MTSSPWQPRNIHNFPNLAKESPPYKYKNPNDNYRSKFSNRDRRRSCSDSKEEVLEIQSMGEPERKRKPRRRRDGPNSLAETLAKWKEFNRQQDHSVCGVKPTRKVPAKGSRKGCMRGKGGPENSHCNYRGVRQRTWGKWVAEIREPNRGGRLWLGTFATAWEAARAYDEAAKAMFGPTARLNFPDHDASSNESSTATESCGSNATTSSQPSSISGVVDLKPKVPKVEPKEVDICGGNSQKPETEKLVGEEPLFLNLDRIEDLPEEMFDIDDMLRMVDADQNDPNNGDRVGVDVGDANWQNWLYGSPSAYAFRLEMEPSIDYGYNFIRPMRQDMDYAPPPSMDPDMFDLPDMFDSGVAEFQSSI
>LrAP2/ERF74
MATIIDMYKKSNSSSVDPLNGELMKALQPFIKSASTSPSFSSSSSSCIATTQLPRFPSNPQNRNFDIMSYPQTPNFYDQNLNFYDQSSNFALPQLNPAQIHQIQSQFQYQQLQQQSQLFSSSSSNDYYHSNQRRLLGPKSQPMKPNLPLSKPMKLYRGVRQRHWGKWVAEIRLPRNRTRLWLGTFDTAEEAALAYDKAAFKLRGDSARLNFPDLRRNGSHFGPPLHSSVEAKLSAICDNIDIHVPNQGKEKNVEEHELKEDNKSEALSENEVELNSSCETKQLDFVEKPWDETESLLLQKFPSLEIDWASILN
>LrAP2/ERF75
MSTLDLIRQHLLADTDDLINLSNPNPNPTQNIKPEITNPIRHDRRPSLAISLPSRPDKQQQQKQQSDPNDAHRYRGVRQRPWGKFAAEIRDPNRRGSRVWLGTFETAIEAARAYDRAAFQMRGRKAILNFPNEIGCSVINNDPLPSALATGIKRGREEEEEEKAVKKEKVEEAAETLDCPLTPSSWMGFLDGNGNGIFELPLLSPLSPHPSLGFSHMVV
>LrAP2/ERF76
MLDLNIASSTESSSSAAEKPILDAQMDDSGTSNSSVLNEEDSCSNNPLGFHFGILKNKDEEENDGFVTKDLFPMGESSSSLRQTHFLDLGFSQREKNHHHQQQQQHSHQHQQQVVKKSRRGPRSRSSQYRGVTFYRRTGRWESHIWDCGKQVYLGGFDTAHIAARAYDRAAIKFRGVDADINFNLSDYDEDLKQMANLSKEEFVHILRRQSTGFSRGSSKYRGVTLHKCGRWEARMGQFLGKKYIYLGLFDSEVEAARAYDKAAIKSNGREAVTNFEPSSYEGEMLLDAESEAIGHDLDLNLRISQPNVSSPKKGDNPMNAPFHLGSFETFDAKKSRLRSSAMTNEHPQAWTALDPSFFPSNVEGAVGKRPMINSHALPNWTWQVHGSSVPL
>LrAP2/ERF77
MLKPSPSSSSSSPFNPSPNGHQIPPVKPRLKRTRRARDANEARSSPGQTKRSSIYRGVTKHRWTGRYEAHLWDKLSWNQMQNKKGKQVYLGAYDEEEAAARTYDVAALKYWGPDTLLNFPISTYEKEYEEMQSMSREECMASLRRRSSGFSRGASKYRGVAKHHHNGRWEARIGRVYGNKYLYLGTFNTQEEAARAYDLAALEYRGTNAVTNFDIGLYINRAPQIQNQIPTQHQQQIFADQQPPQLPLIPNEFPTTTVNNTLPADGPYCNYSLPNLTQDFVDDPVPISNFDCYNVTNVTEPTTCVDMINIDCSGGFLDFLESDGFMDNIDCLFDECGLLGSCDVNVDATSGDLDGSAEATAQAEIDLDQITQMMNSDSSNYSLPISICS
>LrAP2/ERF78
MLISFLVFFAYAWPRGWSSPCFSSVYLGGYDSEQKAARTYDLAALKYWGVSATTNFLASSYCEEMEIMKNMTKQEFIASIRRNSSGFSRGASIYRGVTRHHQHGRWQARIGRVAGNKDLYLGTFSSEEEAAEAYNVAAIKFRGSNAVTNFAFSRYNIEAKFLDCGLLYNFACRYECR
>LrAP2/ERF79
MWREIIINHLLKAKRSTMLDLNESPNRQIEEDEEEEQNKENENSSSSIQSDHGNDNPVITHQLFPADEPKSWDFGGKPLPQSHWVGVQFKHSLERLDATKSIKKSRRGPRSRSSQYRGVTFYRRTGRWESHIWDCGKQVYLGGFDTAHAAARAYDRAAIKFRGAEADINFSLDDYNEDLKQMGSLSKEEFVHVLRRQSTGFPRGSSRYRGVTLHKCGRWEARLGQFLGKKYVYLGLFDTEVDAARAYDKAVIKCNGKDAVTNFDPSIYSDELDLNSYDFGHNLNLSLGSSGSKSCNLDQIDEKSSVGMDQRVPMDLETDWRSSNQNALTKSKFDDKLKLAQEGSTINF
>LrAP2/ERF80
MSGDHQHLPSPHVCRRGGSTQPPPLPLTVPPSLPPPKQSSSPCPGYIYNEPDPKPPPPPSATTAMLTMSARKLSVYRGIRCRSGKWVLEIREPKKTSRIWLGTFPTPEMAAVAYDVAALALRGSDAVLNFLEKIGMRLMPASADPAYIHATAAAAAAELIPRPKEESGATSWSFVDEEDIFGMPNFLVDMADGMLMSPPRLSPNGLKDSRSEPDQESL
