# Supplementary material for: Functional Characterization of AP2/ERF Transcription Factors during Flower Development and Anthocyanin Biosynthesis Related Candidate Genes in Lycoris
Source: Int J Mol Sci. 2023 Sep 23;24(19):14464. doi: 10.3390/ijms241914464 (PMC10572147; doi:10.3390/ijms241914464)
Supplement: Supplementary file 1 [file ijms-24-14464-s001.zip › Table S5.xls]

## Sheet: Table S5
Table S5. Summary information for LrAP2/ERF proteins in STRING database.
queryIndex	Gene Name	At_ID	Identity(%)	bitscore	At_Gene_Name	annotation
1	LrAP2/ERF01	3702.AT1G72570.1	52.7	380.9	AT1G72570	AP2-like ethylene-responsive transcription factor AIL1; Probably acts as a transcriptional activator. Binds to the GCC-box pathogenesis-related promoter element. May be involved in the regulation of gene expression by stress factors and by components of stress signal transduction pathways (By similarity)
2	LrAP2/ERF02	3702.AT1G50640.1	87.1	111.7	ERF3	Ethylene responsive element binding factor 3; Acts as a transcriptional repressor. Binds to the GCC- box pathogenesis-related promoter element. Involved in the regulation of gene expression by stress factors and by components of stress signal transduction pathways and could also regulate other AtERFs
3	LrAP2/ERF03	3702.AT1G28360.1	90	119	ERF12	Ethylene-responsive transcription factor 12; Involved in the regulation of gene expression by stress factors and by components of stress signal transduction pathways. Transcription factor that binds to the GCC-box pathogenesis- related promoter element. Acts as a transcriptional inhibitor and may regulate other AtERFs (By similarity)
4	LrAP2/ERF04	3702.AT1G71520.1	55.1	114	AT1G71520	Ethylene-responsive transcription factor ERF020; Probably acts as a transcriptional activator. Binds to the GCC-box pathogenesis-related promoter element. May be involved in the regulation of gene expression by stress factors and by components of stress signal transduction pathways (By similarity)
5	LrAP2/ERF05	3702.AT4G17500.1	47.6	169.9	ERF-1	Ethylene responsive element binding factor 1; Encodes a member of the ERF (ethylene response factor) subfamily B-3 of ERF/AP2 transcription factor family (ATERF-1). The protein contains one AP2 domain. There are 18 members in this subfamily including ATERF-1, ATERF-2, AND ATERF-5
6	LrAP2/ERF06	3702.AT4G27950.1	54.9	124.4	CRF4	Ethylene-responsive transcription factor CRF4; Component of the cytokinin signaling pathway involved in cotyledons, leaves, and embryos development. Probably acts as a transcriptional activator. Binds to the GCC-box pathogenesis- related promoter element. May be involved in the regulation of gene expression by stress factors and by components of stress signal transduction pathways (By similarity)
7	LrAP2/ERF07	3702.AT3G14230.1	40.1	198.7	RAP2.2	Ethylene-responsive transcription factor RAP2-2; Transcription factor involved in carotenoid biosynthesis regulation. Binds to the 5'-ATCTA-3' element present in the promoter of phytoene synthase (PSY) and phytoene desaturase (PDS). Involved in ethylene response and resistance to necrotrophic pathogens. Acts as a downstream regulator in the ethylene signaling pathway. Partially redundant with RAP…
8	LrAP2/ERF08	3702.AT3G50260.1	53.7	139.4	CEJ1	Cooperatively regulated by ethylene and jasmonate 1; Probably acts as a transcriptional activator. Binds to the GCC-box pathogenesis-related promoter element. May be involved in the regulation of gene expression by stress factors and by components of stress signal transduction pathways (By similarity)
9	LrAP2/ERF09	3702.AT4G13620.1	57.4	151.8	AT4G13620	Ethylene-responsive transcription factor ERF062; Probably acts as a transcriptional activator. Binds to the GCC-box pathogenesis-related promoter element. May be involved in the regulation of gene expression by stress factors and by components of stress signal transduction pathways (By similarity)
10	LrAP2/ERF10	3702.AT1G28160.1	73	139.4	AT1G28160	Ethylene-responsive transcription factor ERF087; Probably acts as a transcriptional activator. Binds to the GCC-box pathogenesis-related promoter element. May be involved in the regulation of gene expression by stress factors and by components of stress signal transduction pathways (By similarity)
11	LrAP2/ERF11	3702.AT5G51190.1	42.4	122.9	AT5G51190	Ethylene-responsive transcription factor ERF105; Probably acts as a transcriptional activator. Binds to the GCC-box pathogenesis-related promoter element. May be involved in the regulation of gene expression by stress factors and by components of stress signal transduction pathways (By similarity)
12	LrAP2/ERF12	3702.AT1G77640.1	68.4	120.2	AT1G77640	Ethylene-responsive transcription factor ERF013; Probably acts as a transcriptional activator. Binds to the GCC-box pathogenesis-related promoter element. May be involved in the regulation of gene expression by stress factors and by components of stress signal transduction pathways (By similarity)
13	LrAP2/ERF13	3702.AT4G37750.1	49.4	417.9	ANT	AP2-like ethylene-responsive transcription factor ANT; Transcription activator that recognizes and binds to the DNA consensus sequence 5'-CAC[AG]N[AT]TNCCNANG-3'. Required for the initiation and growth of ovules integumenta, and for the development of female gametophyte. Plays a critical role in the development of gynoecium marginal tissues (e.g. stigma, style and septa), and in the fusion of car…
14	LrAP2/ERF14	3702.AT1G04370.1	54.9	111.3	ERF14	Ethylene-responsive element binding factor 14; Encodes a member of the ERF (ethylene response factor) subfamily B-3 of ERF/AP2 transcription factor family. The protein contains one AP2 domain. There are 18 members in this subfamily including ATERF-1, ATERF-2, AND ATERF-5
15	LrAP2/ERF15	3702.AT1G46768.1	56.6	137.1	RAP2.1	Ethylene-responsive transcription factor RAP2-1; Probably acts as a transcriptional activator. Binds to the GCC-box pathogenesis-related promoter element. May be involved in the regulation of gene expression by stress factors and by components of stress signal transduction pathways (By similarity)
16	LrAP2/ERF16	3702.AT1G64380.1	50.7	158.3	AT1G64380	Ethylene-responsive transcription factor ERF061; Probably acts as a transcriptional activator. Binds to the GCC-box pathogenesis-related promoter element. May be involved in the regulation of gene expression by stress factors and by components of stress signal transduction pathways (By similarity)
17	LrAP2/ERF17	3702.AT1G25560.1	60.6	333.6	TEM1	AP2/ERF and B3 domain-containing transcription repressor TEM1; Encodes a member of the RAV transcription factor family that contains AP2 and B3 binding domains. Involved in the regulation of flowering under long days. Loss of function results in early flowering. Overexpression causes late flowering and repression of expression of FT. Novel transcriptional regulator involved in ethylene signaling.…
18	LrAP2/ERF18	3702.AT5G07310.1	53.3	141.7	AT5G07310	Ethylene-responsive transcription factor ERF115; Acts as a transcriptional activator of the phytosulfokine PSK5 peptide hormone. Binds to the GCC-box pathogenesis-related promoter element. Rate-limiting factor of quiescent center cell division active when surrounding stem cells are damaged. Is a proteolytic target of APC/C-FZR1 complex
19	LrAP2/ERF19	3702.AT5G47230.1	55.6	120.9	ERF5	Ethylene responsive element binding factor 5; Encodes a member of the ERF (ethylene response factor) subfamily B-3 of ERF/AP2 transcription factor family (ATERF-5). The protein contains one AP2 domain. There are 18 members in this subfamily including ATERF-1, ATERF-2, AND ATERF-5
20	LrAP2/ERF20	3702.AT4G17500.1	46.9	164.1	ERF-1	Ethylene responsive element binding factor 1; Encodes a member of the ERF (ethylene response factor) subfamily B-3 of ERF/AP2 transcription factor family (ATERF-1). The protein contains one AP2 domain. There are 18 members in this subfamily including ATERF-1, ATERF-2, AND ATERF-5
21	LrAP2/ERF21	3702.AT5G44210.1	93.7	125.9	ERF9	Ethylene-responsive transcription factor 9; Involved in the regulation of gene expression by stress factors and by components of stress signal transduction pathways. Transcription factor that binds to the GCC-box pathogenesis- related promoter element. Acts as a transcriptional inhibitor and may regulate other AtERFs (By similarity)
22	LrAP2/ERF22	3702.AT3G15210.1	85.2	110.5	ERF4	Ethylene responsive element binding factor 4; Encodes a member of the ERF (ethylene response factor) subfamily B-1 of ERF/AP2 transcription factor family (ATERF-4). The protein contains one AP2 domain. Acts as a negative regulator of JA-responsive defense gene expression and resistance to the necrotrophic fungal pathogen Fusarium oxysporum and antagonizes JA inhibition of root elongation
23	LrAP2/ERF23	3702.AT1G15360.1	59.8	219.9	SHN1	Integrase-type DNA-binding superfamily protein; Encodes a member of the ERF (ethylene response factor) subfamily B-6 of ERF/AP2 transcription factor family. The protein contains one AP2 domain. There are 12 members in this subfamily including RAP2.11. This gene is involved in wax biosynthesis. Over-expression of the gene results in glossy leaf phenotype and increased drought tolerance. Two closel…
24	LrAP2/ERF24	3702.AT1G13260.1	55.8	316.2	RAV1	AP2/ERF and B3 domain-containing transcription factor RAV1; Encodes an AP2/B3 domain transcription factor which is upregulated in response to low temperature. It contains a B3 DNA binding domain. It has circadian regulation and may function as a negative growth regulator; Belongs to the AP2/ERF transcription factor family. RAV subfamily
25	LrAP2/ERF25	3702.AT5G13330.1	50	134	Rap2.6L	Ethylene-responsive transcription factor ERF113; Transcriptional activator involved in the regulation of plant development and tolerance to abiotic stresses. Acts as positive regulator of tolerance to waterlogging stress. Delays waterlogging-induced premature senescence by regulating stomatal closure and antioxidant enzyme activity. May function through ABI1-mediated abscisic acid (ABA) signaling…
26	LrAP2/ERF26	3702.AT2G41710.3	46.7	332.8	AT2G41710	AP2-like ethylene-responsive transcription factor At2g41710; Probably acts as a transcriptional activator. Binds to the GCC-box pathogenesis-related promoter element. May be involved in the regulation of gene expression by stress factors and by components of stress signal transduction pathways (By similarity)
27	LrAP2/ERF27	3702.AT5G51990.1	49.8	195.3	CBF4	Dehydration-responsive element-binding protein 1D; Encodes a member of the DREB subfamily A-1 of ERF/AP2 transcription factor family (CBF4). The protein contains one AP2 domain. There are six members in this subfamily, including CBF1, CBF2, and CBF3. This gene is involved in response to drought stress and abscisic acid treatment, but not to low temperature
28	LrAP2/ERF28	3702.AT2G47520.1	52.8	159.8	ERF71	Hypoxia responsive erf (ethylene response factor) 2; Ethylene-responsive transcription factor ERF071; Probably acts as a transcriptional activator. Binds to the GCC-box pathogenesis-related promoter element. May be involved in the regulation of gene expression by stress factors and by components of stress signal transduction pathways (By similarity)
29	LrAP2/ERF29	3702.AT4G13040.3	44.2	155.6	AT4G13040	Ethylene-responsive transcription factor-like protein At4g13040; Probably acts as a transcriptional activator. Binds to the GCC-box pathogenesis-related promoter element. May be involved in the regulation of gene expression by stress factors and by components of stress signal transduction pathways (By similarity)
30	LrAP2/ERF30	3702.AT5G53290.1	46.6	137.5	CRF3	Ethylene-responsive transcription factor CRF3; Component of the cytokinin signaling pathway involved in cotyledons, leaves, and embryos development. Probably acts as a transcriptional activator. Binds to the GCC-box pathogenesis- related promoter element. May be involved in the regulation of gene expression by stress factors and by components of stress signal transduction pathways (By similarity)
31	LrAP2/ERF31	3702.AT2G46310.1	43	114.8	CRF5	Ethylene-responsive transcription factor crf5; CRF5 encodes one of the six cytokinin response factors. It is transcriptionally upregulated in response to cytokinin. CRF5 belongs to the AP2/ERF superfamily of the transcriptional factors. CRF proteins rapidly relocalize to the nucleus in response to cytokinin. Analysis of loos-of-function mutants revealed that the CRFs function redundantly to regul…
32	LrAP2/ERF32	3702.AT5G53290.1	44.8	140.2	CRF3	Ethylene-responsive transcription factor CRF3; Component of the cytokinin signaling pathway involved in cotyledons, leaves, and embryos development. Probably acts as a transcriptional activator. Binds to the GCC-box pathogenesis- related promoter element. May be involved in the regulation of gene expression by stress factors and by components of stress signal transduction pathways (By similarity)
33	LrAP2/ERF33	3702.AT1G25560.1	56.7	325.9	TEM1	AP2/ERF and B3 domain-containing transcription repressor TEM1; Encodes a member of the RAV transcription factor family that contains AP2 and B3 binding domains. Involved in the regulation of flowering under long days. Loss of function results in early flowering. Overexpression causes late flowering and repression of expression of FT. Novel transcriptional regulator involved in ethylene signaling.…
34	LrAP2/ERF34	3702.AT4G39780.1	48.4	172.9	AT4G39780	Ethylene-responsive transcription factor ERF060; Probably acts as a transcriptional activator. Binds to the GCC-box pathogenesis-related promoter element. May be involved in the regulation of gene expression by stress factors and by components of stress signal transduction pathways (By similarity)
35	LrAP2/ERF35	3702.AT2G20880.1	35.6	137.5	ERF53	Ethylene-responsive transcription factor ERF053; Transcriptional activator involved in abiotic stress tolerance. Can directly regulate stress-related gene expression by binding to the DNA sequence 5'-[AG]CCGAC-3' (DRE element) of their promoter region. Involved in the regulation of stomatal closure movement under drought stress. Acts as a positive regulator of drought stress response
36	LrAP2/ERF36	3702.AT4G27950.1	45.9	103.2	CRF4	Ethylene-responsive transcription factor CRF4; Component of the cytokinin signaling pathway involved in cotyledons, leaves, and embryos development. Probably acts as a transcriptional activator. Binds to the GCC-box pathogenesis- related promoter element. May be involved in the regulation of gene expression by stress factors and by components of stress signal transduction pathways (By similarity)
37	LrAP2/ERF37	3702.AT1G78080.1	41.8	176.4	RAP2.4	Ethylene-responsive transcription factor RAP2-4; Probably acts as a transcriptional activator. Binds to the GCC-box pathogenesis-related promoter element. May be involved in the regulation of gene expression by stress factors and by components of stress signal transduction pathways (By similarity)
38	LrAP2/ERF38	3702.AT4G25480.1	46.6	155.6	DREB1A	Dehydration-responsive element-binding protein 1A; Encodes a member of the DREB subfamily A-1 of ERF/AP2 transcription factor family (CBF3). The protein contains one AP2 domain. There are six members in this subfamily, including CBF1, CBF2, and CBF3. This gene is involved in response to low temperature and abscisic acid
39	LrAP2/ERF39	3702.AT3G14230.1	40.1	200.3	RAP2.2	Ethylene-responsive transcription factor RAP2-2; Transcription factor involved in carotenoid biosynthesis regulation. Binds to the 5'-ATCTA-3' element present in the promoter of phytoene synthase (PSY) and phytoene desaturase (PDS). Involved in ethylene response and resistance to necrotrophic pathogens. Acts as a downstream regulator in the ethylene signaling pathway. Partially redundant with RAP…
40	LrAP2/ERF40	3702.AT4G16750.1	61.2	164.9	AT4G16750	Ethylene-responsive transcription factor ERF039; Probably acts as a transcriptional activator. Binds to the GCC-box pathogenesis-related promoter element. May be involved in the regulation of gene expression by stress factors and by components of stress signal transduction pathways (By similarity)
41	LrAP2/ERF41	3702.AT5G05410.1	48.9	156.4	DREB2A	Dehydration-responsive element-binding protein 2A; Encodes a transcription factor that specifically binds to DRE/CRT cis elements (responsive to drought and low-temperature stress). Belongs to the DREB subfamily A-2 of ERF/AP2 transcription factor family (DREB2A). There are eight members in this subfamily including DREB2B. The protein contains one AP2 domain. Overexpression of transcriptional act…
42	LrAP2/ERF42	3702.AT5G53290.1	39.3	91.3	CRF3	Ethylene-responsive transcription factor CRF3; Component of the cytokinin signaling pathway involved in cotyledons, leaves, and embryos development. Probably acts as a transcriptional activator. Binds to the GCC-box pathogenesis- related promoter element. May be involved in the regulation of gene expression by stress factors and by components of stress signal transduction pathways (By similarity)
43	LrAP2/ERF43	3702.AT5G57390.1	55.9	226.1	AIL5	AP2-like ethylene-responsive transcription factor AIL5; Encodes a member of the AP2 family of transcriptional regulators.May be involved in germination and seedling growth. Mutants are resistant to ABA analogs and are resistant to high nitrogen concentrations.essential for the developmental transition between the embryonic and vegetative phases in plants.Overexpression results in the formation of…
44	LrAP2/ERF44	3702.AT5G25190.1	55.3	126.3	ESE3	Ethylene-responsive transcription factor ERF003; Probably acts as a transcriptional activator. Binds to the GCC-box pathogenesis-related promoter element. May be involved in the regulation of gene expression by stress factors and by components of stress signal transduction pathways (By similarity)
45	LrAP2/ERF45	3702.AT3G14230.1	40.1	184.5	RAP2.2	Ethylene-responsive transcription factor RAP2-2; Transcription factor involved in carotenoid biosynthesis regulation. Binds to the 5'-ATCTA-3' element present in the promoter of phytoene synthase (PSY) and phytoene desaturase (PDS). Involved in ethylene response and resistance to necrotrophic pathogens. Acts as a downstream regulator in the ethylene signaling pathway. Partially redundant with RAP…
46	LrAP2/ERF46	3702.AT4G37750.1	41.8	154.1	ANT	AP2-like ethylene-responsive transcription factor ANT; Transcription activator that recognizes and binds to the DNA consensus sequence 5'-CAC[AG]N[AT]TNCCNANG-3'. Required for the initiation and growth of ovules integumenta, and for the development of female gametophyte. Plays a critical role in the development of gynoecium marginal tissues (e.g. stigma, style and septa), and in the fusion of car…
47	LrAP2/ERF47	3702.AT5G11590.1	56.1	188	TINY2	Dehydration-responsive element-binding protein 3; Probably acts as a transcriptional activator. Binds to the GCC-box pathogenesis-related promoter element. May be involved in the regulation of gene expression by stress factors and by components of stress signal transduction pathways (By similarity)
48	LrAP2/ERF48	3702.AT1G50640.1	46.5	112.1	ERF3	Ethylene responsive element binding factor 3; Acts as a transcriptional repressor. Binds to the GCC- box pathogenesis-related promoter element. Involved in the regulation of gene expression by stress factors and by components of stress signal transduction pathways and could also regulate other AtERFs
49	LrAP2/ERF49	3702.AT3G14230.1	41.1	209.9	RAP2.2	Ethylene-responsive transcription factor RAP2-2; Transcription factor involved in carotenoid biosynthesis regulation. Binds to the 5'-ATCTA-3' element present in the promoter of phytoene synthase (PSY) and phytoene desaturase (PDS). Involved in ethylene response and resistance to necrotrophic pathogens. Acts as a downstream regulator in the ethylene signaling pathway. Partially redundant with RAP…
50	LrAP2/ERF50	3702.AT5G50080.1	63.6	129	ERF110	Ethylene-responsive transcription factor ERF110; Probably acts as a transcriptional activator. Binds to the GCC-box pathogenesis-related promoter element. May be involved in the regulation of gene expression by stress factors and by components of stress signal transduction pathways (By similarity)
51	LrAP2/ERF51	3702.AT5G25190.1	73.8	131	ESE3	Ethylene-responsive transcription factor ERF003; Probably acts as a transcriptional activator. Binds to the GCC-box pathogenesis-related promoter element. May be involved in the regulation of gene expression by stress factors and by components of stress signal transduction pathways (By similarity)
52	LrAP2/ERF52	3702.AT4G34410.1	56.3	125.2	RRTF1	Ethylene-responsive transcription factor ERF109; Probably acts as a transcriptional activator. Binds to the GCC-box pathogenesis-related promoter element. May be involved in the regulation of gene expression by stress factors and by components of stress signal transduction pathways (By similarity)
53	LrAP2/ERF53	3702.AT5G51190.1	45.5	159.8	AT5G51190	Ethylene-responsive transcription factor ERF105; Probably acts as a transcriptional activator. Binds to the GCC-box pathogenesis-related promoter element. May be involved in the regulation of gene expression by stress factors and by components of stress signal transduction pathways (By similarity)
54	LrAP2/ERF54	3702.AT4G36920.2	55.7	364.8	AP2	Integrase-type DNA-binding superfamily protein; Probable transcriptional activator that promotes early floral meristem identity. Is required subsequently for the transition of an inflorescence meristem into a floral meristem. Plays a central role in the specification of floral identity, particularly for the normal development of sepals and petals in the wild-type flower, by spatially controlling …
55	LrAP2/ERF55	3702.AT1G72570.1	62.2	375.6	AT1G72570	AP2-like ethylene-responsive transcription factor AIL1; Probably acts as a transcriptional activator. Binds to the GCC-box pathogenesis-related promoter element. May be involved in the regulation of gene expression by stress factors and by components of stress signal transduction pathways (By similarity)
56	LrAP2/ERF56	3702.AT4G39780.1	38.7	179.1	AT4G39780	Ethylene-responsive transcription factor ERF060; Probably acts as a transcriptional activator. Binds to the GCC-box pathogenesis-related promoter element. May be involved in the regulation of gene expression by stress factors and by components of stress signal transduction pathways (By similarity)
57	LrAP2/ERF57	3702.AT3G23240.1	48	150.6	ERF1	Ethylene-responsive transcription factor 1B; Acts as a transcriptional activator. Binds to the GCC- box pathogenesis-related promoter element. Involved in the regulation of gene expression during the plant development, and/or mediated by stress factors and by components of stress signal transduction pathways. Seems to be a key integrator of ethylene and jasmonate signals in the regulation of ethy…
58	LrAP2/ERF58	3702.AT5G05410.1	54.7	163.7	DREB2A	Dehydration-responsive element-binding protein 2A; Encodes a transcription factor that specifically binds to DRE/CRT cis elements (responsive to drought and low-temperature stress). Belongs to the DREB subfamily A-2 of ERF/AP2 transcription factor family (DREB2A). There are eight members in this subfamily including DREB2B. The protein contains one AP2 domain. Overexpression of transcriptional act…
59	LrAP2/ERF59	3702.AT5G11590.1	52.7	164.5	TINY2	Dehydration-responsive element-binding protein 3; Probably acts as a transcriptional activator. Binds to the GCC-box pathogenesis-related promoter element. May be involved in the regulation of gene expression by stress factors and by components of stress signal transduction pathways (By similarity)
60	LrAP2/ERF60	3702.AT1G50640.1	47.2	114	ERF3	Ethylene responsive element binding factor 3; Acts as a transcriptional repressor. Binds to the GCC- box pathogenesis-related promoter element. Involved in the regulation of gene expression by stress factors and by components of stress signal transduction pathways and could also regulate other AtERFs
61	LrAP2/ERF61	3702.AT3G16770.1	51.4	124.4	EBP	Ethylene-responsive transcription factor RAP2-3; Encodes a member of the ERF (ethylene response factor) subfamily B-2 of the plant specific ERF/AP2 transcription factor family (RAP2.3). The protein contains one AP2 domain. There are 5 members in this subfamily including RAP2.2 AND RAP2.12.It is localized to the nucleus and acts as a transcriptional activator through the GCC-box. It has been ident…
62	LrAP2/ERF62	3702.AT1G50640.1	47	117.1	ERF3	Ethylene responsive element binding factor 3; Acts as a transcriptional repressor. Binds to the GCC- box pathogenesis-related promoter element. Involved in the regulation of gene expression by stress factors and by components of stress signal transduction pathways and could also regulate other AtERFs
63	LrAP2/ERF63	3702.AT5G50080.1	53	132.1	ERF110	Ethylene-responsive transcription factor ERF110; Probably acts as a transcriptional activator. Binds to the GCC-box pathogenesis-related promoter element. May be involved in the regulation of gene expression by stress factors and by components of stress signal transduction pathways (By similarity)
64	LrAP2/ERF64	3702.AT4G36920.2	60.5	372.5	AP2	Integrase-type DNA-binding superfamily protein; Probable transcriptional activator that promotes early floral meristem identity. Is required subsequently for the transition of an inflorescence meristem into a floral meristem. Plays a central role in the specification of floral identity, particularly for the normal development of sepals and petals in the wild-type flower, by spatially controlling …
65	LrAP2/ERF65	3702.AT1G22190.1	51.3	167.9	AT1G22190	Ethylene-responsive transcription factor RAP2-13; Probably acts as a transcriptional activator. Binds to the GCC-box pathogenesis-related promoter element. May be involved in the regulation of gene expression by stress factors and by components of stress signal transduction pathways (By similarity); Belongs to the AP2/ERF transcription factor family. ERF subfamily
66	LrAP2/ERF66	3702.AT5G50080.1	59.5	139.4	ERF110	Ethylene-responsive transcription factor ERF110; Probably acts as a transcriptional activator. Binds to the GCC-box pathogenesis-related promoter element. May be involved in the regulation of gene expression by stress factors and by components of stress signal transduction pathways (By similarity)
67	LrAP2/ERF67	3702.AT1G68550.2	37.5	76.3	CRF10	Ethylene-responsive transcription factor ERF118; Probably acts as a transcriptional activator. Binds to the GCC-box pathogenesis-related promoter element. May be involved in the regulation of gene expression by stress factors and by components of stress signal transduction pathways (By similarity)
68	LrAP2/ERF68	3702.AT5G44210.1	70.3	129.4	ERF9	Ethylene-responsive transcription factor 9; Involved in the regulation of gene expression by stress factors and by components of stress signal transduction pathways. Transcription factor that binds to the GCC-box pathogenesis- related promoter element. Acts as a transcriptional inhibitor and may regulate other AtERFs (By similarity)
69	LrAP2/ERF69	3702.AT1G28160.1	73	139.4	AT1G28160	Ethylene-responsive transcription factor ERF087; Probably acts as a transcriptional activator. Binds to the GCC-box pathogenesis-related promoter element. May be involved in the regulation of gene expression by stress factors and by components of stress signal transduction pathways (By similarity)
70	LrAP2/ERF70	3702.AT2G28550.3	63	342.8	RAP2.7	Ethylene-responsive transcription factor RAP2-7; Probably acts as a transcriptional activator. Binds to the GCC-box pathogenesis-related promoter element. May be involved in the regulation of gene expression by stress factors and by components of stress signal transduction pathways (By similarity). Regulates negatively the transition to flowering time and confers flowering time delay; Belongs to …
71	LrAP2/ERF71	3702.AT1G50640.1	71.4	114.8	ERF3	Ethylene responsive element binding factor 3; Acts as a transcriptional repressor. Binds to the GCC- box pathogenesis-related promoter element. Involved in the regulation of gene expression by stress factors and by components of stress signal transduction pathways and could also regulate other AtERFs
72	LrAP2/ERF72	3702.AT3G54320.1	81.5	302.4	WRI1	Integrase-type DNA-binding superfamily protein; WRINKLED1 encodes transcription factor of the AP2/ERWEBP class. Protein has two plant-specific (AP2/EREB) DNA-binding domains and is involved in the control of storage compound biosynthesis in Arabidopsis. Mutants have wrinkled seed phenotype, due to a defect in the incorporation of sucrose and glucose into triacylglycerols. Transgenic sGsL plants (…
73	LrAP2/ERF73	3702.AT5G05410.1	58.6	168.7	DREB2A	Dehydration-responsive element-binding protein 2A; Encodes a transcription factor that specifically binds to DRE/CRT cis elements (responsive to drought and low-temperature stress). Belongs to the DREB subfamily A-2 of ERF/AP2 transcription factor family (DREB2A). There are eight members in this subfamily including DREB2B. The protein contains one AP2 domain. Overexpression of transcriptional act…
74	LrAP2/ERF74	3702.AT1G78080.1	49.6	175.3	RAP2.4	Ethylene-responsive transcription factor RAP2-4; Probably acts as a transcriptional activator. Binds to the GCC-box pathogenesis-related promoter element. May be involved in the regulation of gene expression by stress factors and by components of stress signal transduction pathways (By similarity)
75	LrAP2/ERF75	3702.AT5G51190.1	44.2	153.7	AT5G51190	Ethylene-responsive transcription factor ERF105; Probably acts as a transcriptional activator. Binds to the GCC-box pathogenesis-related promoter element. May be involved in the regulation of gene expression by stress factors and by components of stress signal transduction pathways (By similarity)
76	LrAP2/ERF76	3702.AT2G28550.3	54.3	366.7	RAP2.7	Ethylene-responsive transcription factor RAP2-7; Probably acts as a transcriptional activator. Binds to the GCC-box pathogenesis-related promoter element. May be involved in the regulation of gene expression by stress factors and by components of stress signal transduction pathways (By similarity). Regulates negatively the transition to flowering time and confers flowering time delay; Belongs to …
77	LrAP2/ERF77	3702.AT3G54320.1	81.5	302	WRI1	Integrase-type DNA-binding superfamily protein; WRINKLED1 encodes transcription factor of the AP2/ERWEBP class. Protein has two plant-specific (AP2/EREB) DNA-binding domains and is involved in the control of storage compound biosynthesis in Arabidopsis. Mutants have wrinkled seed phenotype, due to a defect in the incorporation of sucrose and glucose into triacylglycerols. Transgenic sGsL plants (…
78	LrAP2/ERF78	3702.AT1G51190.1	80	223.4	PLT2	AP2-like ethylene-responsive transcription factor PLT2; Probably acts as a transcriptional activator. Binds to the GCC-box pathogenesis-related promoter element. May be involved in the regulation of gene expression by stress factors and by components of stress signal transduction pathways (By similarity). Master regulator of basal/root fate. Essential for root quiescent center (QC) and columella …
79	LrAP2/ERF79	3702.AT4G36920.2	69.6	359.8	AP2	Integrase-type DNA-binding superfamily protein; Probable transcriptional activator that promotes early floral meristem identity. Is required subsequently for the transition of an inflorescence meristem into a floral meristem. Plays a central role in the specification of floral identity, particularly for the normal development of sepals and petals in the wild-type flower, by spatially controlling …
80	LrAP2/ERF80	3702.AT5G52020.1	47.6	130.2	AT5G52020	Ethylene-responsive transcription factor ERF025; Probably acts as a transcriptional activator. Binds to the GCC-box pathogenesis-related promoter element. May be involved in the regulation of gene expression by stress factors and by components of stress signal transduction pathways (By similarity)
