# Supplementary material for: Functional Characterization of AP2/ERF Transcription Factors during Flower Development and Anthocyanin Biosynthesis Related Candidate Genes in Lycoris
Source: Int J Mol Sci. 2023 Sep 23;24(19):14464. doi: 10.3390/ijms241914464 (PMC10572147; doi:10.3390/ijms241914464)
Supplement: Supplementary file 1 [file ijms-24-14464-s001.zip › Table S6.xlsx]

## Sheet: Table S6
Table S6. L.longituba and L. radiata used for genetic diversity analysis
Species	Individual Numbers	Karotype	Ploidy	Characters	Places of Collection
L.longituba	NAS0626770	2n = 16	diploid	fertile	Nanjing Botanical Garden Mem. Sun Yat-Sen (118° 83′ E, 32° 05′ N)
L. radiata	NAS0626728	2n = 22	diploid	fertile	Nanjing Botanical Garden Mem. Sun Yat-Sen (118° 83′ E, 32° 05′ N)
