# Supplementary material for: Functional Characterization of AP2/ERF Transcription Factors during Flower Development and Anthocyanin Biosynthesis Related Candidate Genes in Lycoris
Source: Int J Mol Sci. 2023 Sep 23;24(19):14464. doi: 10.3390/ijms241914464 (PMC10572147; doi:10.3390/ijms241914464)
Supplement: Supplementary file 1 [file ijms-24-14464-s001.zip › Table S7.xlsx]

## Sheet: Table S7
Table S7. Primers used in this study
Names	Sequences (5'-3')
Primers used for quantitative RT-PCR
LrTIP41-qrt-F	GCAACCATCCAAAGTTTAACTGCT
LrTIP41-qrt-R	AATGTGCAAGCAGGGCTAGTAA
LrAP2/ERF1-qrt-F	CAAAAGGGAGGGGCAAAAGC
LrAP2/ERF1-qrt-R	GCAGAGACGCCCCAATACTT
LrAP2/ERF2-qrt-F	TGACCCGTACAAGAAGGCAC
LrAP2/ERF2-qrt-R	TTTGGCGGGAAGTTGGTCTT
LrAP2/ERF3-qrt-F	ATGCAGCGGAGATAAGGGAC
LrAP2/ERF3-qrt-R	CGAGGAAGAAACCAAGGGGG
LrAP2/ERF4-qrt-F	ACCGCCATATTCTTCCTCCG
LrAP2/ERF4-qrt-R	TATCTCCCGCCACCTTCTGA
LrAP2/ERF5-qrt-F	TCGAGCTTCAACAGCATCGT
LrAP2/ERF5-qrt-R	TTATCTCCGCCGCGTACTTC
LrAP2/ERF6-qrt-F	AATAGTGTGCCACGACCCAG
LrAP2/ERF6-qrt-R	CCCCACGAAACTTGACCGTA
LrAP2/ERF7-qrt-F	AGCTCGATGGGCTTCCAAAT
LrAP2/ERF7-qrt-R	TGGCTTTCTTGCCTCGGATT
LrAP2/ERF8-qrt-F	CGCCAGGCTTAATTTTCCCG
LrAP2/ERF8-qrt-R	CATAGCATCCACCCGAGTCC
LrAP2/ERF9-qrt-F	CATACGTTCGCTCGTGGGAT
LrAP2/ERF9-qrt-R	ACGTGCAAATTCGTCCTCCT
LrAP2/ERF10-qrt-F	GCTGCACTCTCCATGAAAGG
LrAP2/ERF10-qrt-R	GAGGAGGTGGTGGTTGTTGTA
LrAP2/ERF11-qrt-F	ACGGAGCTAGAGTGTGGCTA
LrAP2/ERF11-qrt-R	TAAGAATAGCACGCGACCCC
LrAP2/ERF12-qrt-F	AAGGGAGTTCGAATGCGGAG
LrAP2/ERF12-qrt-R	GCCGATGAGCCCTTAAGACA
LrAP2/ERF13-qrt-F	GGATGCACTGAAGTATTGGGGA
LrAP2/ERF13-qrt-R	TGGAAGCCCCGAGAGAAAAC
LrAP2/ERF14-qrt-F	TGTTCGTGTTTGGCTCGGTA
LrAP2/ERF14-qrt-R	AATTGAGAACCGCAAACGGC
LrAP2/ERF15-qrt-F	GAAATGGGGCAAATGGGTCG
LrAP2/ERF15-qrt-R	AATGAAAGCGGCCGACAAAG
LrAP2/ERF16-qrt-F	CCATCTGTTCGAGGATCGGG
LrAP2/ERF16-qrt-R	CATCCTCGCCAGCGAATACT
LrAP2/ERF17-qrt-F	TGTTCGAGAAGACGGTGACG
LrAP2/ERF17-qrt-R	TCGGTACGAGCAATCTGCAA
LrAP2/ERF18-qrt-F	GCACGTGCTTCCTAACCCTA
LrAP2/ERF18-qrt-R	CATTTGCCCCACGGTCTTTG
LrAP2/ERF19-qrt-F	GAGAGCGGCCAGTAGGTAAC
LrAP2/ERF19-qrt-R	TGGATCCCGACATCCCGATA
LrAP2/ERF20-qrt-F	AAACCCCGCCTTCTACTGTG
LrAP2/ERF20-qrt-R	CAAACCCTAGCCCCGTTCTT
LrAP2/ERF21-qrt-F	GACCTCGATCTCTTCGCCTG
LrAP2/ERF21-qrt-R	CGGAGTCCGAAAATCCGTCA
LrAP2/ERF22-qrt-F	CGGCGAAGGAGTTACGCTAT
LrAP2/ERF22-qrt-R	CCTTGGATCCTCGCAGGTTT
LrAP2/ERF23-qrt-F	GTCTCCGAGATTCGACACCC
LrAP2/ERF23-qrt-R	CGCTCATTAACACTGCAGCC
LrAP2/ERF24-qrt-F	GATGCCATCACCAACTTCGC
LrAP2/ERF24-qrt-R	GCTCCCTGTCTGCTTCAGTT
LrAP2/ERF25-qrt-F	AGAGACCCGAAGAAAGCTGC
LrAP2/ERF25-qrt-R	TGGCCGATTTGGTTGAAGGT
LrAP2/ERF26-qrt-F	TGGTGCTGGTAGTGAGCTTG
LrAP2/ERF26-qrt-R	CAATCAGTCCTCAAGGGCGT
LrAP2/ERF27-qrt-F	ACGCGGATGTTGTGAGTGAT
LrAP2/ERF27-qrt-R	GGATCGATCAGCATCCCCTG
LrAP2/ERF28-qrt-F	CAACTTCCCCAACGAGGACT
LrAP2/ERF28-qrt-R	ACCCCACCGAAGAGATCCAT
LrAP2/ERF29-qrt-F	ACCGTGCATAATGAGGGGTG
LrAP2/ERF29-qrt-R	CTCCCGCACATAAAAGCTGC
LrAP2/ERF30-qrt-F	TCTGGCTCGGGACTTTTGAC
LrAP2/ERF30-qrt-R	ACTCTCCATCGCCGTTTCAG
LrAP2/ERF31-qrt-F	CGACCACAAACGGAGGAGAA
LrAP2/ERF31-qrt-R	GTCGTAGACTTTGGCAGCCT
LrAP2/ERF32-qrt-F	CGGAGAGTCGATGGAGAACG
LrAP2/ERF32-qrt-R	ATCCACGCTGAACCCAAGAG
LrAP2/ERF33-qrt-F	CTTCAAGCCCCTGTCCGAAT
LrAP2/ERF33-qrt-R	CTTACTGCAGCTTTCCCCGA
LrAP2/ERF34-qrt-F	AGCCAGTTCCTGTTGAGAGC
LrAP2/ERF34-qrt-R	CAGACTCATCCCATGGCACC
LrAP2/ERF35-qrt-F	CAACAGCAACAGAAGGTGCC
LrAP2/ERF35-qrt-R	TTATGCGAGGCGGTGGTATC
LrAP2/ERF36-qrt-F	CGTCCGAGTCTCCTTCATCG
LrAP2/ERF36-qrt-R	CCGCTTCCGCAGGATTCTAT
LrAP2/ERF37-qrt-F	CGTTGTCAAAGCCCACGAAG
LrAP2/ERF37-qrt-R	TAGGCCAAAGCAGCTTCCTC
LrAP2/ERF38-qrt-F	GTTCCAAGAAACGCGACACC
LrAP2/ERF38-qrt-R	TCTCAGCCGTAGGGAACGTA
LrAP2/ERF39-qrt-F	CGATGGACCTGCTGAACGAT
LrAP2/ERF39-qrt-R	AAATGTTCCCAGCCAAACGC
LrAP2/ERF40-qrt-F	GGATGCGTAACTGGGGGAAA
LrAP2/ERF40-qrt-R	AGCTGAAGCAGCTTGGATGT
LrAP2/ERF41-qrt-F	AGCGCCCAAGGAGATCAAAA
LrAP2/ERF41-qrt-R	CCCACAAGCTGGATCACCAT
LrAP2/ERF42-qrt-F	TCCCTAAAACCCCGAAAGCC
LrAP2/ERF42-qrt-R	TCAGAAGCTGCCAGGTAAGC
LrAP2/ERF43-qrt-F	GGGTCCAACCGATAGTGCAA
LrAP2/ERF43-qrt-R	CCTCCTCACATGGGCAACAT
LrAP2/ERF44-qrt-F	GCAAGGCTCATTTGTGGTCC
LrAP2/ERF44-qrt-R	GCTTTTGGGTCTTGGTGCAA
LrAP2/ERF45-qrt-F	TTTCCCTTCGAACCCAGCTC
LrAP2/ERF45-qrt-R	GCTTCAGCATCGTAAGCACG
LrAP2/ERF46-qrt-F	GAACATGAGCAGGCAGGAATA
LrAP2/ERF46-qrt-R	TTGCCATCTCCCATGCTGAT
LrAP2/ERF47-qrt-F	AATGGAGGTGGCCAGTGATG
LrAP2/ERF47-qrt-R	ACGGGTCTACCGGGTCATAA
LrAP2/ERF48-qrt-F	GAGAGGGAGATTGCCGTAGC
LrAP2/ERF48-qrt-R	TGGCGGCAACTCATTCAGAT
LrAP2/ERF49-qrt-F	ATCCTCGCAAAGGTGTTCGT
LrAP2/ERF49-qrt-R	CAAGGTCCGACGTGTTGAGA
LrAP2/ERF50-qrt-F	CCTGAAAACGTTCAGCGTCG
LrAP2/ERF50-qrt-R	TGCTCCTTGTAACAGCCTCG
LrAP2/ERF51-qrt-F	GGGAGTAAGGCAAAGGCACT
LrAP2/ERF51-qrt-R	CTTGGACCGCACATCAAACG
LrAP2/ERF52-qrt-F	GAAAGGGGGTTCGGAAGTGG
LrAP2/ERF52-qrt-R	TAAGCTTTGCACGTGCTCCT
LrAP2/ERF53-qrt-F	GTCCGTTGACTCCGTCAAGT
LrAP2/ERF53-qrt-R	GTGAAAACCCTATGGGCGGA
LrAP2/ERF54-qrt-F	TGGCCATCACCAATTTCCGA
LrAP2/ERF54-qrt-R	GCCAACTTGGTGCCGATTTT
LrAP2/ERF55-qrt-F	AGAGCTTATGACCTGGCTGC
LrAP2/ERF55-qrt-R	CCCCTCGAGAGAACCCACTA
LrAP2/ERF56-qrt-F	ATCTCAAAGGCCCTCCAAGC
LrAP2/ERF56-qrt-R	GTACCAAGCCAGAGCCTTGT
LrAP2/ERF57-qrt-F	CGTTGCACGAGCTAGATTGC
LrAP2/ERF57-qrt-R	TTCTCCGCCATCGTTGTTGA
LrAP2/ERF58-qrt-F	GGAACATTTGCCACCGCATT
LrAP2/ERF58-qrt-R	CTTTTGGCTCCAACTTCGGC
LrAP2/ERF59-qrt-F	AGGATTGGGATGGGCTAGGA
LrAP2/ERF59-qrt-R	CTTGTCATCCAACACGCACG
LrAP2/ERF60-qrt-F	CTCCACCGTCGAATCGTTCA
LrAP2/ERF60-qrt-R	AAATCCTCCTCAATCGGCGG
LrAP2/ERF61-qrt-F	TTTGAGCTCAGCTTCGTCGT
LrAP2/ERF61-qrt-R	TGCCATTGGACGATTCTGCT
LrAP2/ERF62-qrt-F	GTTCGATCGGTGAGCCTGTA
LrAP2/ERF62-qrt-R	AAGCGAGATCCTCGTCCTCA
LrAP2/ERF63-qrt-F	CGACGAAGCTGCCCTAAGAT
LrAP2/ERF63-qrt-R	CTCCTTGCAAGAGCCTCGAA
LrAP2/ERF64-qrt-F	GTCGAGGAGCTCGCAGTATC
LrAP2/ERF64-qrt-R	GGCAGTGTCAAAACCCCCTA
LrAP2/ERF65-qrt-F	TGAAGAGGCTGCTTTGGCTT
LrAP2/ERF65-qrt-R	ATTAGCAGGCAAAGGCCCAT
LrAP2/ERF66-qrt-F	CAACGTCCATGGGGCAAATG
LrAP2/ERF66-qrt-R	GGCCGATGAAGAAGCGGATA
LrAP2/ERF67-qrt-F	GAGGAAGCTCACAGCGCTTA
LrAP2/ERF67-qrt-R	ACGAAAAGATCCGCGACCAT
LrAP2/ERF68-qrt-F	GAATCGTCGATCCCTCCACC
LrAP2/ERF68-qrt-R	GCAGGGGAACGGAAACCTAA
LrAP2/ERF69-qrt-F	AATGAGTCAGCATGGTGCGA
LrAP2/ERF69-qrt-R	GGCTGTGCACGTATCCTTCT
LrAP2/ERF70-qrt-F	GAGACGACGACGGAGATGAC
LrAP2/ERF70-qrt-R	CTGCTGACAATGCACCATCG
LrAP2/ERF71-qrt-F	AAGACCCGTAAATGGCTCGG
LrAP2/ERF71-qrt-R	TCAGATCGATCATCAGCGGC
LrAP2/ERF72-qrt-F	TATGAAGCCCACCTCTGGGA
LrAP2/ERF72-qrt-R	AAGAGTATCAGGCCCCCAGT
LrAP2/ERF73-qrt-F	GAGGCAACGTACATGGGGAA
LrAP2/ERF73-qrt-R	AATTAAGACGGGCAGTGGGG
LrAP2/ERF74-qrt-F	GCCATTGGGGGAAATGGGTA
LrAP2/ERF74-qrt-R	TAAGCCTGGCAGAGTCTCCT
LrAP2/ERF75-qrt-F	CGACCCTTTACCGTTAGCGT
LrAP2/ERF75-qrt-R	GCGTCAACGGACAATCCAAC
LrAP2/ERF76-qrt-F	AAGAGCATACGATCGGGCTG
LrAP2/ERF76-qrt-R	CCTCTCGAAAACCCAGTGCT
LrAP2/ERF77-qrt-F	TCGCCATCACAACGTACCTC
LrAP2/ERF77-qrt-R	AGCTGCGGCTTCTTCATCAT
LrAP2/ERF78-qrt-F	CGATGGCAAGCAAGAATCGG
LrAP2/ERF78-qrt-R	TTGCATTGGAGCCCCTGAAT
LrAP2/ERF79-qrt-F	GAAGAACTGGCCGATGGGAA
LrAP2/ERF79-qrt-R	GCTGCTCGATCGTAAGCTCT
LrAP2/ERF80-qrt-F	CGGAAAGTGGGTTTCGGAGA
LrAP2/ERF80-qrt-R	GCACGAATATCGGCAGGAGA
